# Supplementary material
Source: publisher figshare collection journal article supplement (https://gsapubs.figshare.com/articles/dataset/_/22237012)
Supplement: Supplementary file 1 [file 39523018]

Hu, W.L., Wang, Q., Tang, G.J., Qi, Y., Wang, J., Yang, Z.Y., and Sun, P., 2023, First identification of the Early Cretaceous mafic dikes in the Baingoin area, central Tibet: Implications for crust–mantle interactions and magmatic flare-up: GSA Bulletin, <https://doi.org/10.1130/B36755.1>.

## Supplemental Material

**Figure S1.** Back-scattered electron (BSE) images and geochemical profiles of clinopyroxene phenocrysts in the Nakoulai mafic dikes.

**Figure S2.** Back-scattered electron (BSE) images and geochemical profiles of plagioclase phenocrysts in the Nakoulai mafic dikes.

**Figure S3.** Plots of selected whole-rock major and trace elements versus Zr for the Nakoulai mafic dikes.

**Figure S4.** Probability plots of zircon  $\epsilon_{\text{Hf}}(t)$  and  $\delta^{18}\text{O}$  values for the Nakoulai mafic dikes.

**Figure S5.** Plots of selected whole-rock major and trace elements versus MgO and Cr for the Nakoulai mafic dikes.

**Supplemental Text S1.** Analytical methods.

**Table S1.** SIMS zircon U–Pb dating results for the Nakoulai mafic dikes.

**Table S2.** Representative clinopyroxene major element compositions (wt%) from the Nakoulai mafic dikes.

**Table S3.** Representative orthopyroxene major element compositions (wt%) from the Nakoulai mafic dikes.

**Table S4.** Representative plagioclase phenocryst and inclusion major element compositions (wt%) and Sr isotope data from the Nakoulai mafic dikes.

**Table S5.** Representative titanomagnetite major element compositions (wt%) from the Nakoulai mafic dikes.

**Table S6.** Representative clinopyroxene trace element compositions (ppm) from the Nakoulai mafic dikes.

**Table S7.** Representative orthopyroxene trace element compositions (ppm) from the Nakoulai mafic dikes.

**Table S8.** Representative plagioclase trace element compositions (ppm) from the Nakoulai mafic dikes.

**Table S9.** Major (wt%) and trace (ppm) element data for the Nakoulai mafic dikes.

**Table S10.** Whole-rock Sr–Nd–Hf isotope data for the Nakoulai mafic dikes.

**Table S11.** Zircon Hf–O isotope data for the Nakoulai mafic dikes.

**Table S12.** LA–ICP–MS analyzed trace elements (ppm) for standard sample (TB–1G).

**Table S13.** Trace element (ppm) compositions of replicate sample and reference materials.

# Supplemental Material for

## First identification of the Early Cretaceous mafic dykes in the Baingoin area, Central Tibet: Implications for crust–mantle interactions and magmatic flare-up

Wan-Long Hu<sup>1,2</sup>, Qiang Wang<sup>1,2,3,\*</sup>, Gong-Jian Tang<sup>1,2</sup>, Yue Qi<sup>1,2</sup>, Jun Wang<sup>1,2</sup>,

Zong-Yong Yang<sup>1,4</sup>, and Peng Sun<sup>1</sup>

<sup>1</sup>*State Key Laboratory of Isotope Geochemistry, Guangzhou Institute of Geochemistry,  
Chinese Academy of Sciences, Guangzhou 510640, China*

<sup>2</sup>*CAS Center for Excellence in Deep Earth Science, Guangzhou 510640, China*

<sup>3</sup>*College of Earth and Planetary Sciences, University of Chinese Academy of Sciences, Beijing  
100049, China*

<sup>4</sup>*State Key Laboratory of Ore Deposit Geochemistry, Institute of Geochemistry, Chinese  
Academy of Sciences, Guiyang 550002, China*

*E-mail address: wqiang@gig.ac.cn (Q. Wang)*

### Contents of this file

1. Supplementary figures (*S1 to S5*)
2. Analytical methods
3. Analytical data (*Table S1 to S13*)

## **Introduction**

The supplemental material here provides:

### **1. Supplementary Figures**

- 1.1. Figure S1: Back-scattered electron (BSE) images and geochemical profiles of clinopyroxene phenocrysts in the Nakoulai mafic dykes.
- 1.2. Figure S2: Back-scattered electron (BSE) images and geochemical profiles of plagioclase phenocrysts in the Nakoulai mafic dykes.
- 1.3. Figure S3: Plots of selected whole-rock major and trace elements versus Zr for the Nakoulai mafic dykes.
- 1.4. Figure S4: Probability plots of zircon  $\varepsilon_{\text{Hf}}(t)$  and  $\delta^{18}\text{O}$  values for the Nakoulai mafic dykes.
- 1.5. Figure S5: Harker variation diagrams of selected whole-rock major and trace elements versus MgO for the Nakoulai mafic dykes.

### **2. Analytical methods**

- 2.1. Zircon U–Pb dating and Hf–O isotopic analyses
- 2.2. Mineral element and Sr isotopic analyses
- 2.3. Whole-rock element analyses
- 2.4. Whole-rock Sr–Nd–Hf isotopic analyses

### **3. Analytical data**

- 3.1. Table S1: SIMS zircon U–Pb dating results for the Nakoulai mafic dykes.
- 3.2. Table S2: Representative clinopyroxene major element compositions (wt%) from the Nakoulai mafic dykes.
- 3.3. Table S3: Representative orthopyroxene major element compositions (wt%) from the

Nakoulai mafic dykes.

- 3.4. Table S4: Representative plagioclase phenocryst and inclusion major element compositions (wt%) and Sr isotope data from the Nakoulai mafic dykes.
- 3.5. Table S5: Representative titanomagnetite major element compositions (wt%) from the Nakoulai mafic dykes.
- 3.6. Table S6: Representative clinopyroxene trace element compositions (ppm) from the Nakoulai mafic dykes.
- 3.7. Table S7: Representative orthopyroxene trace element compositions (ppm) from the Nakoulai mafic dykes.
- 3.8. Table S8: Representative plagioclase trace element compositions (ppm) from the Nakoulai mafic dykes.
- 3.9. Table S9: Major (wt%) and trace (ppm) element data for the Nakoulai mafic dykes.
- 3.10. Table S10: Whole-rock Sr–Nd–Hf isotope data for the Nakoulai mafic dykes.
- 3.11. Table S11: Zircon Hf–O isotope data for the Nakoulai mafic dykes.
- 3.12. Table S12: LA–ICP–MS analyzed trace elements (ppm) for standard sample (TB–1G).
- 3.13. Table S13: Trace element (ppm) compositions of replicate sample and reference materials.

## 1. Supplementary Figures

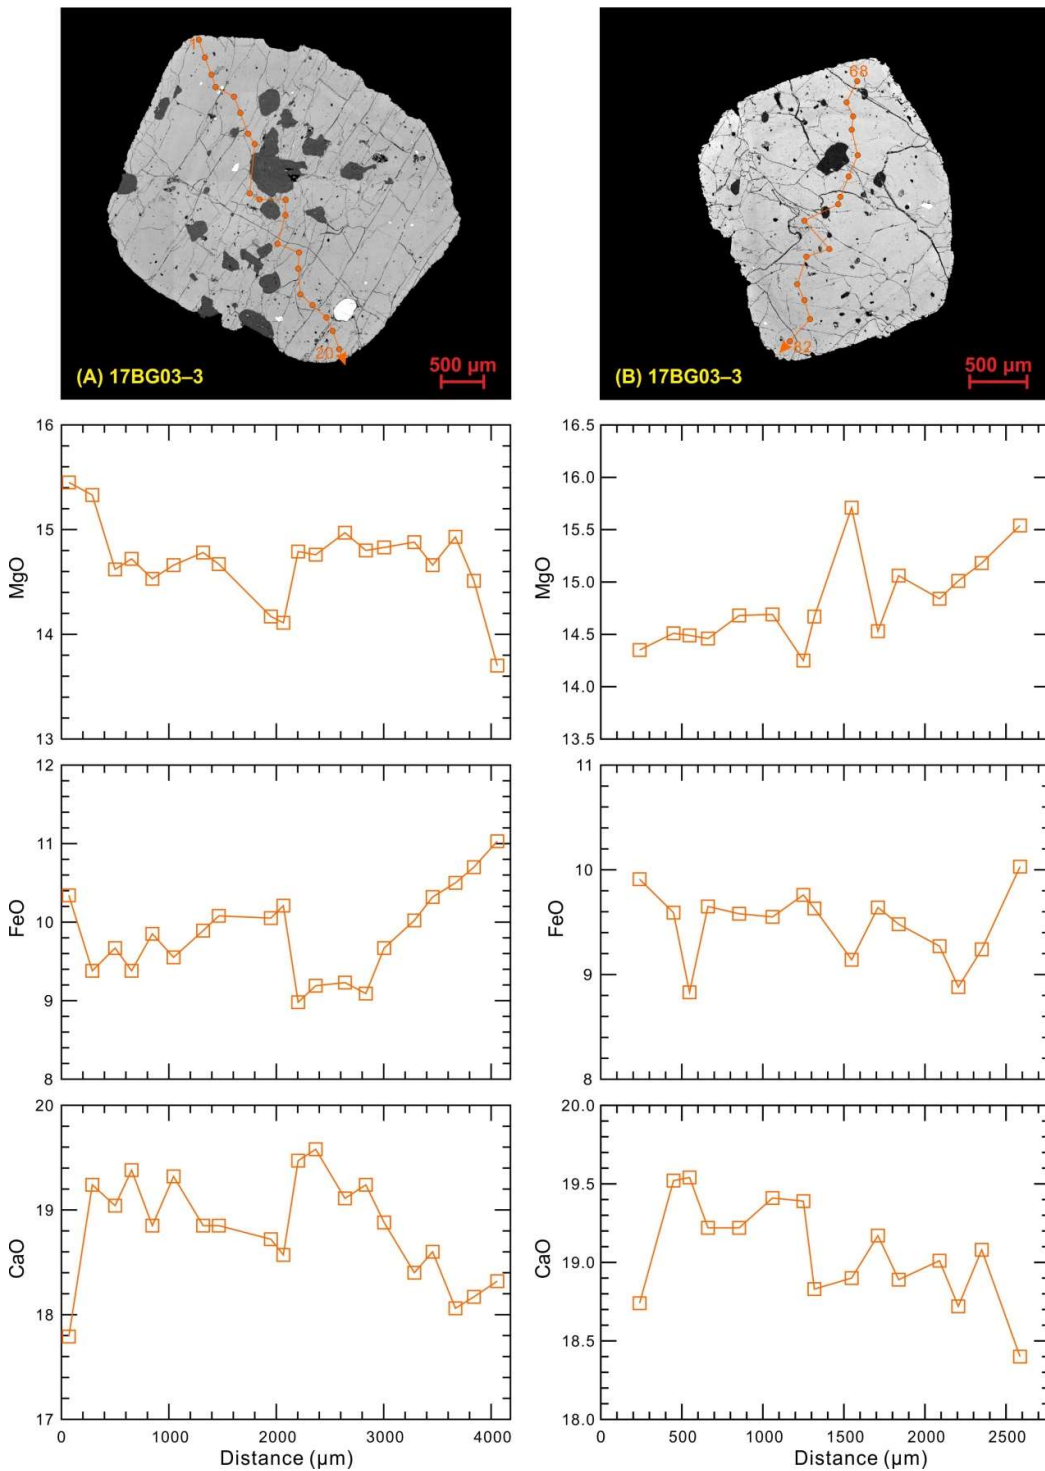

1.1. Figure S1: Back-scattered electron (BSE) images and geochemical profiles of clinopyroxene phenocrysts in the Nakoulai mafic dikes.

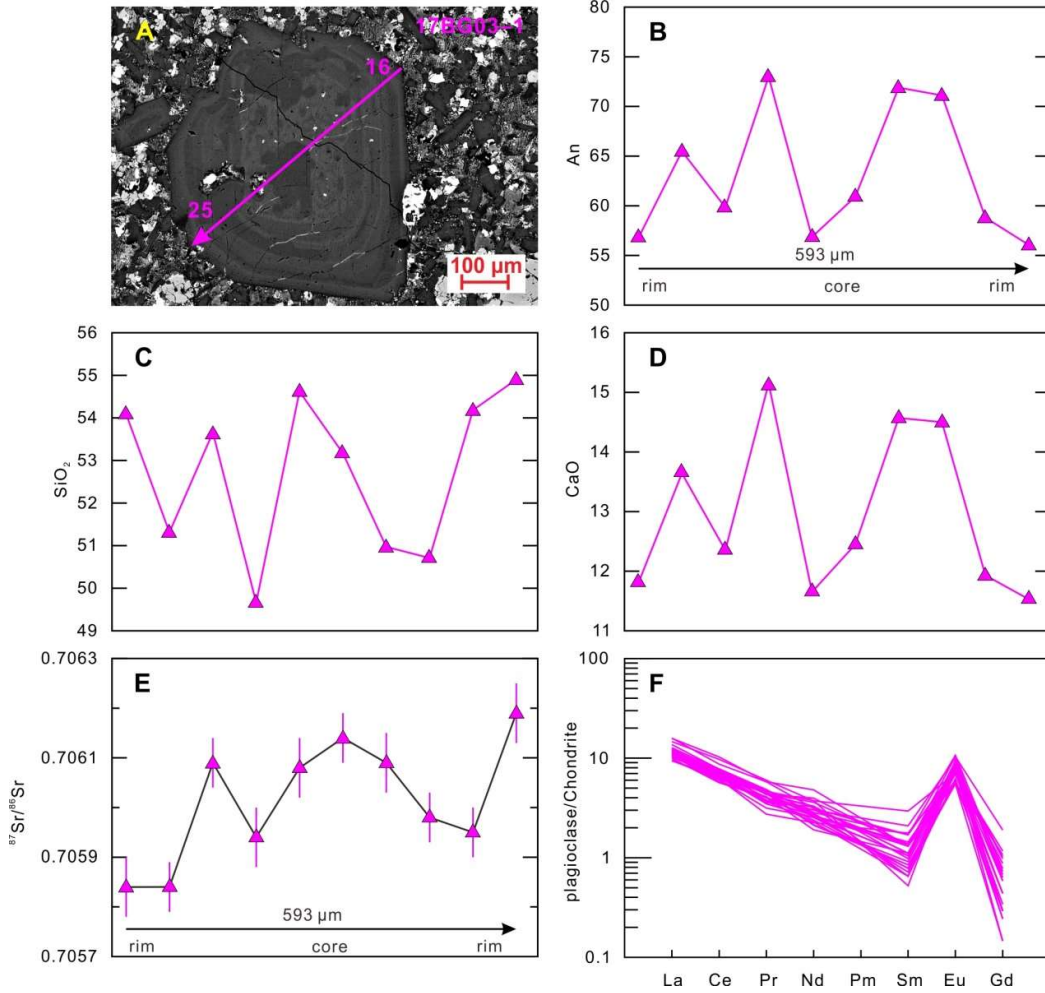

1.2. Figure S2: Back-scattered electron (BSE) images and geochemical profiles of plagioclase phenocrysts in the Nakoulai mafic dikes.

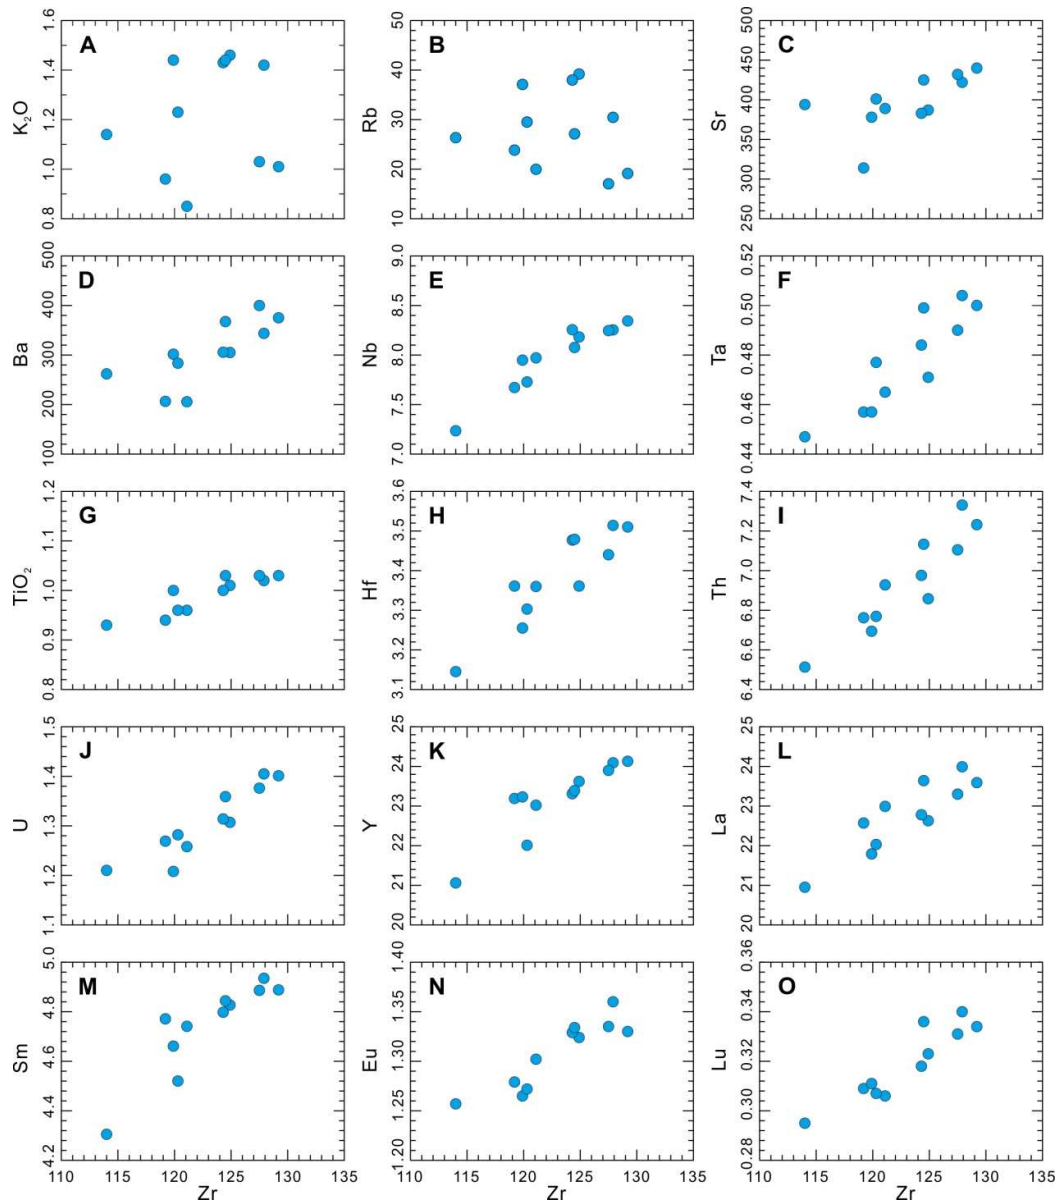

1.3. Figure S3: Plots of selected whole-rock major and trace elements versus Zr for the

Nakoulai mafic dikes.

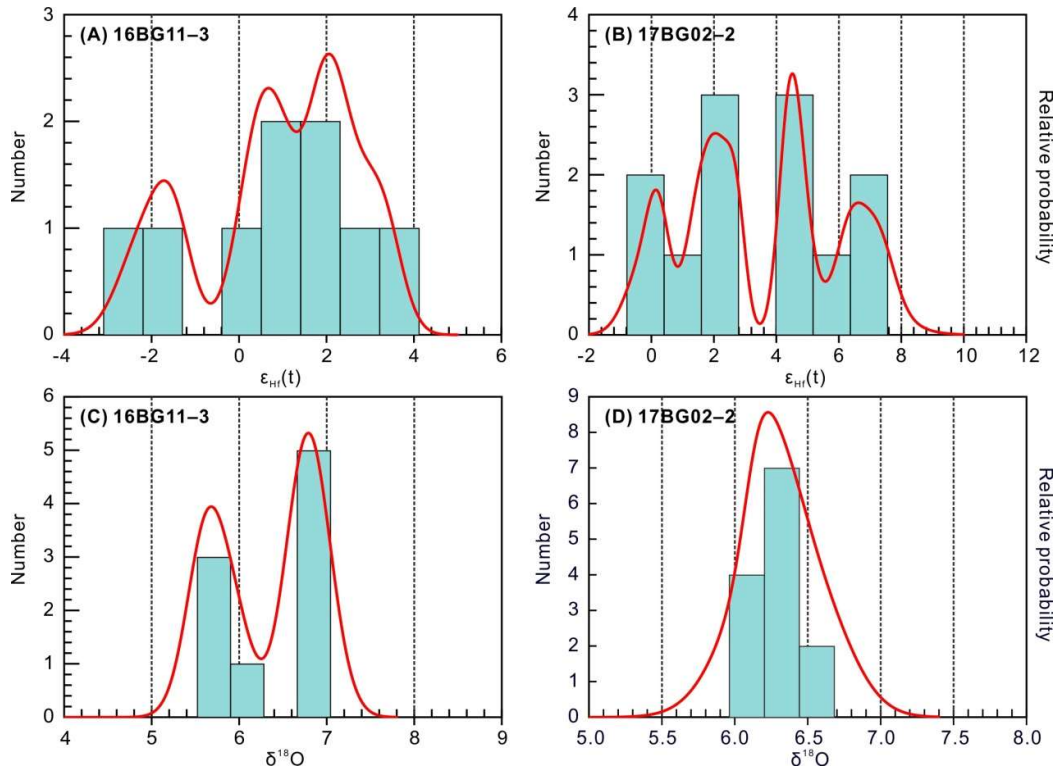

1.4. Figure S4: Probability plots of zircon  $\epsilon_{\text{Hf}}(t)$  and  $\delta^{18}\text{O}$  values for the Nakoulai mafic dikes.

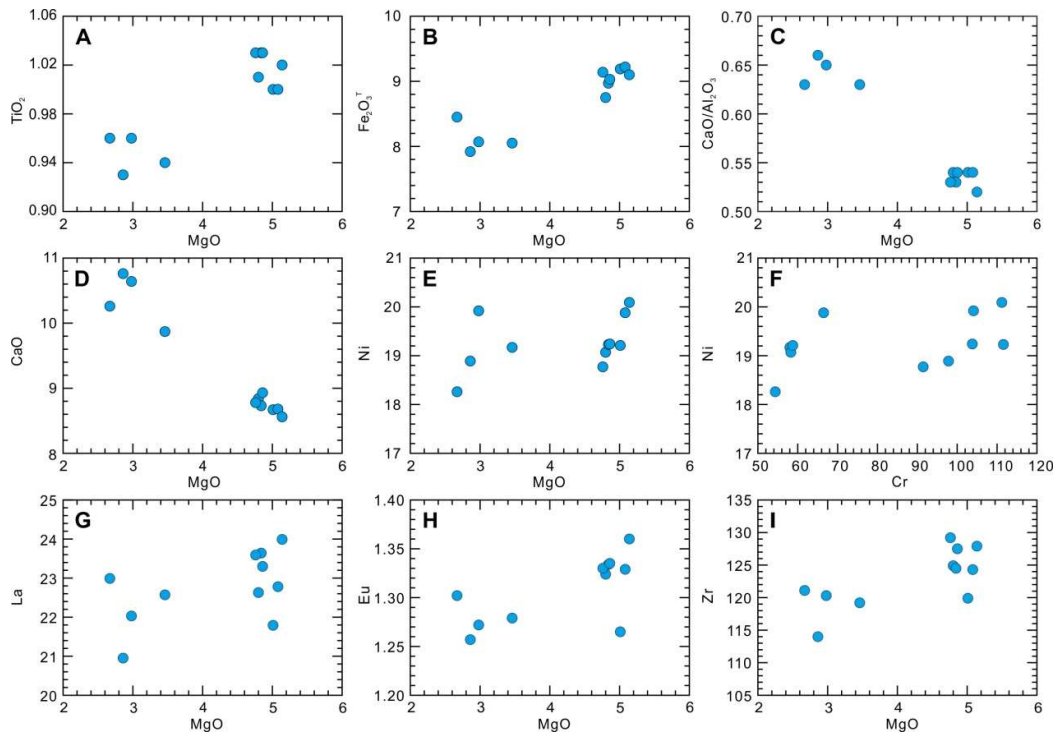

1.5. Figure S5: Harker variation diagrams of selected whole-rock major and trace elements

versus MgO for the Nakoulai mafic dikes.



## 2. Supplemental Text S1. Analytical methods

### 2.1. Zircon U–Pb dating and Hf–O isotopic analyses

Cathodoluminescence (CL) images were obtained for zircons prior to analysis, using a JEOL JXA–8100 Superprobe at the State Key Laboratory of Isotope Geochemistry, Guangzhou Institute of Geochemistry, Chinese Academy of Sciences (SKLaBIG GIG CAS), in order to characterize internal structures and choose potential target sites for U–Pb dating and Hf–O isotopic analyses.

Zircon U–Pb dating was conducted using the Cameca IMS-1280 HR SIMS (Secondary Ion Mass Spectroscopy) at the SKLaBIG, GIG CAS, and analytical procedures followed those described by [Li et al. \(2009\)](#). The  $O_2^-$  primary ion beam with an intensity of  $\sim 10$  nA was accelerated at  $-13$  kV, and the ellipsoidal spot is about  $20 \times 30$   $\mu\text{m}$  in size. U–Th–Pb ratios were determined relative to the  $\sim 337$  Ma standard zircon Plešovice ([Sláma et al., 2008](#)). In order to monitor the external uncertainties of SIMS U–Pb zircon dating calibrated against the Plešovice standard, and the secondary standard zircon Qinghu was analyzed as unknown samples to monitor the reliability of the whole procedure. Nine measurements on Qinghu zircon yielded a concordia age of  $159.8 \pm 2.1$  Ma, which is within the error of the recommended value of  $159.5 \pm 0.2$  Ma ([Li et al., 2013](#)).

Subsequently, zircon O isotopes were measured by the same Cameca IMS-1280 HR at the SKLaBIG GIG CAS. The detailed analytical procedures were similar to those described by [Li et al. \(2010\)](#). The  $Cs^+$  primary ion beam with an intensity of  $\sim 2$  nA was accelerated at 10 kV

and the analytical spots were about 20  $\mu\text{m}$  in diameter. Oxygen isotopes were measured in multi-collector mode using two off-axis Faraday cups. Total analytical time per spot was ca. 3.5 min, including 30 s of pre-sputtering, 120 s of automatic tuning of the secondary beam, and 64 s of analysis. The internal precision of a single analysis generally was better than 0.15‰ (SE) for the  $^{18}\text{O}/^{16}\text{O}$  ratio. The external precision, measured by the reproducibility of repeated analyses of the Penglai standard, is 0.18‰ (2SD,  $n = 18$ ). Ten measurements of the Qinghu zircon standard yielded a weighted mean of  $\delta^{18}\text{O} = 5.59 \pm 0.19\%$  (2SD), which is consistent with the reported value of  $5.4 \pm 0.2\%$  within analytical errors (Li et al., 2013).

*In situ* zircon Lu–Hf isotopic analyses were carried out on a Neptune Plus multi-collector ICP-MS equipped with a RESolution M-50 193 nm laser-ablation system at the SKLaBIG GIG CAS. Lu–Hf isotopic analyses were conducted on the same zircon grains that were previously analyzed for U–Pb isotopes, with ablation pits of 45  $\mu\text{m}$  in diameter, ablation time of 30 s, repetition rate of 6 Hz, and laser beam energy density of 4  $\text{J}/\text{cm}^2$ . The detailed analytical procedures were similar to those described by Zhang et al. (2015). Measured  $^{176}\text{Hf}/^{177}\text{Hf}$  ratios were normalized to  $^{179}\text{Hf}/^{177}\text{Hf} = 0.7325$ . The measurements of the Plešovice zircon standard during the course of this study yielded a weighted mean of  $^{176}\text{Hf}/^{177}\text{Hf} = 0.282480 \pm 0.000016$  ( $n = 10$ , 2SD), which is consistent within errors with the reported value in Sláma et al. (2008).

## 2.2. Mineral element and Sr isotopic analyses

Major element compositions of minerals were determined using a JXA-8100 electron

microprobe at the SKLaBIG GIG CAS. An accelerating voltage of 15 kV, a specimen current of 20 nA, and a beam size of 1–2  $\mu\text{m}$  were employed. The analytical errors are generally < 2%. The analytical procedures were described in detail by [Huang et al. \(2007\)](#).

*In situ* trace element compositions of minerals were measured with an ELEMENT XR (Thermo Fisher Scientific) ICP–MS coupled with a 193-nm (ArF) Resonetics RESolution M-50 laser ablation system at the SKLaIG GIG CAS. Laser spots on minerals were  $\sim 33 \mu\text{m}$  in diameter. The calibration line for each element was constructed by analyzing three USGS (United States Geological Survey) reference glasses (BCR–2G, BHVO–2G, and GSD–1G) with Si as an internal standard element. The secondary reference glasses TB–1G were analyzed as unknown samples to monitor the reliability of the whole procedure. Twenty-six analyses of TB–1G indicate most elements are within 8% of the reference values and the analytical precision (2RSD) was better than 10% for most elements (Table S12). Detailed experiment procedures and data reduction strategies are described by [Zhang et al. \(2018a\)](#).

The analysis of *in-situ* Sr isotope compositions of plagioclase was performed on a Neptune Plus MC–ICP–MS (Thermo Scientific), coupled with a RESolution M-50 193 nm laser ablation system (Resonetics) at the SKLaIG GIG CAS. The analyses were produced in static ablation mode using a beam diameter of 155  $\mu\text{m}$ , a pulse frequency of 6 Hz, and a beam intensity of  $\sim 4 \text{ J}/\text{cm}^2$ . Each analysis consisted of 30 s of gas blank collection with the laser off, followed by 30 s of laser ablation for signal collection. Six Faraday cups were used to detect  $^{83}\text{Kr}$ ,  $^{84}\text{Sr}$ ,  $^{85}\text{Rb}$ ,  $^{86}\text{Sr}$ ,  $^{87}\text{Sr}$ , and  $^{88}\text{Sr}$ . Interferences of  $^{84}\text{Kr}$  and  $^{86}\text{Kr}$  on  $^{84}\text{Sr}$  and  $^{86}\text{Sr}$  were

corrected by subtracting a gas blank from the raw time-resolved signal intensities. The mass bias of  $^{87}\text{Sr}/^{86}\text{Sr}$  was normalized to  $^{86}\text{Sr}/^{88}\text{Sr} = 0.1194$  with an exponential law. The detailed data reduction procedure is reported in [Zhang et al. \(2018b\)](#). Twenty-one analyses of basaltic glass standards NKT-1G during the course of this study yielded a weighted mean of  $0.70351 \pm 0.00010$  (2SD), which is consistent within error with the result reported value in [Elburg et al. \(2005\)](#). Analytical accuracy was evaluated with repeated analysis of a plagioclase in-house standard from the Panzhihua large layered mafic intrusion ([Zhou et al., 2008](#)). The average  $^{87}\text{Sr}/^{86}\text{Sr}$  ratio of plagioclase in-house standard was  $0.70436 \pm 0.00006$  ( $n = 21$ , 2SD), which agrees within the results measured in solution mode by MC-ICP-MS ( $0.704367 \pm 0.000015$ ; [Zhang et al., 2019](#)).

### 2.3. Whole-rock element analyses

Rock samples were crushed by a jaw crusher and then powdered to ~200-mesh size in an agate mill, and the resulting powder was used for analyses of major and trace elements, and Sr-Nd-Hf isotopes at the SKLaBIG GIG CAS. Major element oxides were analyzed on fused glass beads using a Rigaku RIX 2000 X-ray fluorescence spectrometer. The analytical procedures were the same as those described by [Li et al. \(2000\)](#). Glass discs were made by melting dehydrated sample powders. Calibration lines used in quantification were produced by bivariate regression of data from 36 reference materials encompassing a wide range of silicate compositions ([Li et al., 2005](#)), and analytical uncertainties are between 1% and 5% (2SE). Trace elements were analyzed by inductively coupled plasma mass spectrometry (ICP-MS), using a Perkin-Elmer Sciex ELAN 6000 instrument. Analytical procedures were

the same as those described by Li et al. (2000). Trace element data of reference materials (AGV-2, BHVO-2, GSR-1, GSR-2, GSR-3, and W-2a) and replicate sample 17BG03-3R are given in Table S13. The relative standard deviations are < 3% for most element abundances in the reference materials.

#### 2.4. Whole-rock Sr–Nd–Hf isotopic analyses

Sr–Nd–Hf isotopic compositions were measured on a Neptune multi-collector ICP–MS at the SKLaBIG GIG CAS. Analytical procedures are similar to those described in Li et al. (2006). All measured Sr, Nd, and Hf isotope ratios were normalized to  $^{86}\text{Sr}/^{88}\text{Sr} = 0.1194$ ,  $^{146}\text{Nd}/^{144}\text{Nd} = 0.7219$  and  $^{179}\text{Hf}/^{177}\text{Hf} = 0.7325$ , respectively. The measured  $^{87}\text{Sr}/^{86}\text{Sr}$  ratio of the NBS987 standard,  $^{143}\text{Nd}/^{144}\text{Nd}$  ratio of the Shin Etsu JNdi-1 standard and  $^{176}\text{Hf}/^{177}\text{Hf}$  ratio of the JMC 14374 standard were  $0.710259 \pm 0.000028$  ( $n = 15$ , 2SD),  $0.512099 \pm 0.000018$  ( $n = 16$ , 2SD) and  $0.282188 \pm 0.000014$  ( $n = 6$ , 2SD), respectively. The measured Sr, Nd, and Hf isotopic compositions of the USGS (United States Geological Survey) reference material BHVO-2 gave  $0.703494 \pm 0.000009$  (SE),  $0.512987 \pm 0.000006$  (SE) and  $0.283096 \pm 0.000005$  (SE), respectively, which are within the analytical uncertainty of the recommended values (GeoREM, <http://georem.mpch-mainz.gwdg.de/>).

#### References

Elburg, M., Vroon, P., van der Wagt, B., and Tchalikian, A., 2005. Sr and Pb isotopic composition of five USGS glasses (BHVO-2G, BIR-1G, BCR-2G, TB-1G, NKT-1G): *Chemical Geology*, v. 223(4), p. 196–207.

- Huang, X.L., Xu, Y.G., Lo, C.H., Wang, R.C., and Lin, C.Y., 2007. Exsolution Lamellae in a Clinopyroxene Megacryst Aggregate from Cenozoic Basalt, Leizhou Peninsula, South China: Petrography and Chemical Evolution: Contribution Mineralogy and Petrology, v. 154, p. 691–705.
- Li, X.H., Li, W.X., Li, Q.L., Wang, X.C., Liu, Y., and Yang, Y.H., 2010. Petrogenesis and tectonic significance of the ~850 Ma Gangbian alkaline complex in South China: evidence from in situ zircon U–Pb dating, Hf–O isotopes and whole-rock geochemistry: Lithos, v. 114, p. 1–15.
- Li, X.H., Liu, Y., Li, Q.L., Guo, C.H., and Chamberlain, K.R., 2009. Precise determination of Phanerozoic zircon Pb/Pb age by multicollector SIMS without external standardization: Geochemistry, Geophysics, Geosystems, v. 10, Q04010.
- Li, X.H., Tang, G.Q., Gong, B., Yang, Y.H., Hou, K.J., Hu, Z.C., Li, Q.L., Liu, Y., and Li, W.X., 2013. Qinghu zircon: A working reference for microbeam analysis of U-Pb age and Hf and O isotopes: Chinese Science Bulletin, v. 58, p. 4647–4654.
- Li, X.H., Sun, M., Wei, G.J., Liu, Y., Lee, C.Y., and Malpas, J., 2000. Geochemical and Sm-Nd isotopic study of amphibolites in the Cathaysia Block, southeastern China: evidence for an extremely depleted mantle in the Paleoproterozoic: Precambrian Research, v. 102, p. 251–262.
- Li, X.H., Qi, C.S., Liu, Y., Liang, X.R., Tu, X.L., Xie, L.W., and Yang, Y.H., 2005. Petrogenesis of the Neoproterozoic bimodal volcanic rocks along the western margin of the Yangtze Block: new constraints from Hf isotopes and Fe/Mn ratios: Chinese Science Bulletin, v. 50, p. 2481–2486.

- Li, X.H., Li, Z.X., Wingate, M.T.D., Chung, S.L., Liu, Y., Lin, G.C., and Li, W.X., 2006. Geochemistry of the 755 Ma Mundine Well dyke swarm, northwestern Australia: part of a Neoproterozoic mantle superplume beneath Rodinia?: *Precambrian Research*, v. 146, p. 1–15.
- Sláma, J., Košler, J., Condon, D.J., Crowley, J.L., Gerdes, A., Hanchar, J.M., Horstwood, M.S.A., Morris, G.A., Nasdala, L., Norberg, N., Schaltegger, U., Schoene, B., Tubrett, M.N., and Whitehouse, M.J., 2008. Plešovice zircon — A new natural reference material for U–Pb and Hf isotopic microanalysis: *Chemical Geology*, v. 249, p. 1–35.
- Zhang, L., Ren, Z.Y., Handler, M.R., Wu, Y.D., Zhang, L., Qian, S.P., Xia, X.P., Yang, Q. and Xu, Y.G., 2019. The origins of high-Ti and low-Ti magmas in large igneous provinces, insights from melt inclusion trace elements and Sr-Pb isotopes in the Emeishan large Igneous Province: *Lithos*, v. 344–345, p. 122–133.
- Zhang, L., Ren, Z.Y., Xia, X.P., Yang, Q., Hong, L.B. And Wu, D., 2018a. In situ determination of trace elements in melt inclusions using laser ablation-inductively coupled plasma-sector field-mass spectrometry: *Rapid Communications in Mass Spectrometry*, v. 33, p. 361–370.
- Zhang, L., Ren, Z.Y., Wu, Y.D., and Li, N., 2018b. Strontium isotope measurement of basaltic glasses by laser ablation multiple collector inductively coupled plasma mass spectrometry based on a linear relationship between analytical bias and Rb/Sr ratios: *Rapid Communications in Mass Spectrometry*, v. 32, p. 105–112.

Zhang, L., Ren, Z.Y., Xia, X.P., Li, J., and Zhang, Z.F., 2015. Isotope Maker: A Matlab program for isotopic data reduction: *International Journal of Mass Spectrometry*, v. 392, p. 118–124.

Zhou, M.F., Arndt, N.T., Malpas, J., Wang, C.Y., and Kennedy, A.K., 2008. Two magma series and associated ore deposit types in the Permian Emeishan large igneous province, SW China: *Lithos*, v. 103, p. 352–368.



### 3. Analytical data

3.1. Table S1: SIMS zircon U–Pb dating results for the Nakoulai mafic dikes.

| Spot      | Concentrations (ppm) |      |       | Th/U  | f <sub>206</sub> % | Isotopic ratios                      |      |                                     |      |                                     |      | ρ       | Isotopic ages (Ma)                   |       |                                     |      |                                     |     |
|-----------|----------------------|------|-------|-------|--------------------|--------------------------------------|------|-------------------------------------|------|-------------------------------------|------|---------|--------------------------------------|-------|-------------------------------------|------|-------------------------------------|-----|
|           | Pb*                  | Th   | U     |       |                    | <sup>207</sup> Pb/ <sup>206</sup> Pb | ±1σ  | <sup>207</sup> Pb/ <sup>235</sup> U | ±1σ  | <sup>206</sup> Pb/ <sup>238</sup> U | ±1σ  |         | <sup>207</sup> Pb/ <sup>206</sup> Pb | ±1σ   | <sup>207</sup> Pb/ <sup>235</sup> U | ±1σ  | <sup>206</sup> Pb/ <sup>238</sup> U | ±1σ |
| 16BG11-3@ |                      |      |       |       |                    |                                      |      |                                     |      |                                     |      |         |                                      |       |                                     |      |                                     |     |
| 1         | 163                  | 4535 | 12195 | 2.689 | 0.160              | 0.04905                              | 0.69 | 0.12837                             | 1.65 | 0.0190                              | 1.50 | 0.90781 | 150.2                                | 16.2  | 122.6                               | 1.9  | 121.2                               | 1.8 |
| 2         | 141                  | 3083 | 13275 | 4.306 | 0.460              | 0.05028                              | 0.87 | 0.13302                             | 1.73 | 0.0192                              | 1.50 | 0.86609 | 207.8                                | 20.0  | 126.8                               | 2.1  | 122.5                               | 1.8 |
| 3         | 93                   | 2609 | 7340  | 2.813 | 0.520              | 0.04952                              | 0.74 | 0.12724                             | 1.67 | 0.0186                              | 1.50 | 0.89702 | 172.4                                | 17.2  | 121.6                               | 1.9  | 119.0                               | 1.8 |
| 4         | 160                  | 4164 | 14760 | 3.545 | 1.420              | 0.04652                              | 9.70 | 0.11900                             | 9.81 | 0.0186                              | 1.50 | 0.15297 | 24.8                                 | 217.6 | 114.2                               | 10.7 | 118.5                               | 1.8 |
| 5         | 74                   | 2127 | 5490  | 2.582 | 0.710              | 0.05119                              | 1.26 | 0.13116                             | 1.97 | 0.0186                              | 1.51 | 0.76602 | 249.4                                | 28.8  | 125.1                               | 2.3  | 118.7                               | 1.8 |
| 6         | 101                  | 2709 | 8355  | 3.085 | 2.490              | 0.04770                              | 6.38 | 0.12453                             | 6.55 | 0.0189                              | 1.50 | 0.22926 | 84.2                                 | 144.8 | 119.2                               | 7.4  | 120.9                               | 1.8 |
| 7         | 67                   | 1997 | 4912  | 2.460 | 0.570              | 0.04729                              | 2.11 | 0.12004                             | 2.59 | 0.0184                              | 1.50 | 0.57948 | 63.8                                 | 49.6  | 115.1                               | 2.8  | 117.6                               | 1.8 |
| 8         | 165                  | 4097 | 16377 | 3.997 | 0.310              | 0.04865                              | 1.29 | 0.12528                             | 1.98 | 0.0187                              | 1.50 | 0.75875 | 131.2                                | 30.0  | 119.8                               | 2.2  | 119.3                               | 1.8 |
| 9         | 57                   | 1574 | 4536  | 2.882 | 0.660              | 0.04966                              | 1.00 | 0.12728                             | 1.84 | 0.0186                              | 1.54 | 0.83893 | 179.1                                | 23.1  | 121.6                               | 2.1  | 118.7                               | 1.8 |

| Spot | Concentrations (ppm) |    |   | Th/U | Isotopic ratios                     |     |                                      |     | Isotopic ages (Ma)          |     |
|------|----------------------|----|---|------|-------------------------------------|-----|--------------------------------------|-----|-----------------------------|-----|
|      | Pb*                  | Th | U |      | <sup>206</sup> Pb/ <sup>238</sup> U | ±1σ | <sup>207</sup> Pb/ <sup>206</sup> Pb | ±1σ | <sup>207</sup> Pb-corrected | ±1σ |

17BG02-2@

|   |    |      |      |       |        |      |         |      |       |     |
|---|----|------|------|-------|--------|------|---------|------|-------|-----|
| 1 | 8  | 305  | 313  | 0.972 | 54.385 | 1.58 | 0.05564 | 1.64 | 116.3 | 1.8 |
| 2 | 22 | 799  | 902  | 0.885 | 53.885 | 1.78 | 0.04829 | 1.02 | 118.6 | 2.1 |
| 3 | 13 | 419  | 578  | 0.725 | 55.706 | 1.60 | 0.05001 | 1.55 | 114.4 | 1.8 |
| 4 | 15 | 827  | 574  | 1.440 | 54.179 | 1.58 | 0.04978 | 1.31 | 117.7 | 1.8 |
| 5 | 43 | 1914 | 1636 | 1.170 | 45.515 | 1.70 | 0.18590 | 1.64 | 114.2 | 3.5 |
| 6 | 7  | 323  | 271  | 1.188 | 50.583 | 1.61 | 0.12179 | 5.42 | 113.7 | 2.5 |

|    |    |      |     |       |        |      |         |      |       |     |
|----|----|------|-----|-------|--------|------|---------|------|-------|-----|
| 7  | 5  | 234  | 208 | 1.122 | 44.512 | 1.79 | 0.19109 | 3.50 | 115.7 | 3.9 |
| 8  | 8  | 431  | 332 | 1.299 | 57.132 | 1.54 | 0.05548 | 2.07 | 110.8 | 1.7 |
| 9  | 11 | 529  | 401 | 1.318 | 54.046 | 1.63 | 0.06597 | 1.37 | 115.4 | 1.9 |
| 10 | 12 | 477  | 452 | 1.055 | 45.370 | 1.60 | 0.16199 | 7.58 | 119.1 | 3.7 |
| 11 | 10 | 383  | 300 | 1.277 | 49.421 | 1.66 | 0.13549 | 3.37 | 114.0 | 2.6 |
| 12 | 7  | 239  | 225 | 1.060 | 51.522 | 1.54 | 0.09952 | 5.26 | 115.4 | 2.2 |
| 13 | 30 | 2600 | 766 | 3.394 | 54.988 | 1.55 | 0.08151 | 3.41 | 111.0 | 1.9 |

3.2. Table S2: Representative clinopyroxene major element compositions (wt%) from the Nakoulai mafic dikes.

| Spot      | SiO <sub>2</sub> | TiO <sub>2</sub> | Al <sub>2</sub> O <sub>3</sub> | FeO   | MnO   | MgO   | CaO   | Na <sub>2</sub> O | K <sub>2</sub> O | P <sub>2</sub> O <sub>5</sub> | Cr <sub>2</sub> O <sub>3</sub> | NiO   | Cl    | F | Total | Mg/(Mg+Fe <sup>2+</sup> ) | En   | Fs   | Wo   | P   | T    |
|-----------|------------------|------------------|--------------------------------|-------|-------|-------|-------|-------------------|------------------|-------------------------------|--------------------------------|-------|-------|---|-------|---------------------------|------|------|------|-----|------|
| 16BG11-2@ |                  |                  |                                |       |       |       |       |                   |                  |                               |                                |       |       |   |       |                           |      |      |      |     |      |
| 1         | 51.22            | 0.74             | 4.00                           | 9.90  | 0.265 | 14.32 | 19.57 | 0.442             | -                | -                             | 0.054                          | 0.001 | 0.002 | - | 100.5 | 0.74                      | 0.43 | 0.15 | 0.42 |     |      |
| 2         | 49.84            | 0.689            | 4.61                           | 10.62 | 0.247 | 14.67 | 18.67 | 0.561             | -                | -                             | 0.034                          | -     | -     | - | 99.9  | 0.78                      | 0.46 | 0.13 | 0.42 |     |      |
| 3         | 50.86            | 0.713            | 3.62                           | 9.44  | 0.289 | 14.82 | 19.30 | 0.416             | 0.015            | 0.048                         | 0.06                           | -     | 0.002 | - | 99.6  | 0.77                      | 0.45 | 0.14 | 0.42 | 5.6 | 1185 |
| 4         | 50.87            | 0.653            | 3.16                           | 9.99  | 0.241 | 15.00 | 19.07 | 0.381             | 0.009            | 0.028                         | 0.025                          | 0.017 | -     | - | 99.4  | 0.77                      | 0.45 | 0.14 | 0.41 | 5.0 | 1178 |
| 5         | 50.95            | 0.747            | 3.34                           | 9.05  | 0.24  | 14.82 | 19.83 | 0.344             | 0.004            | 0.062                         | 0.089                          | -     | 0.016 | - | 99.5  | 0.77                      | 0.44 | 0.13 | 0.43 | 4.4 | 1173 |
| 6         | 51.42            | 0.669            | 3.00                           | 9.54  | 0.218 | 15.41 | 19.06 | 0.393             | -                | 0.048                         | -                              | 0.016 | 0.016 | - | 99.8  | 0.77                      | 0.46 | 0.14 | 0.41 | 5.2 | 1184 |
| 7         | 51.36            | 0.519            | 2.97                           | 9.78  | 0.281 | 15.32 | 18.95 | 0.381             | -                | 0.031                         | 0.063                          | 0.017 | 0.004 | - | 99.7  | 0.77                      | 0.46 | 0.14 | 0.41 | 5.2 | 1184 |
| 8         | 51.54            | 0.572            | 2.81                           | 9.62  | 0.242 | 15.14 | 18.87 | 0.418             | -                | 0.027                         | 0.033                          | 0.031 | 0.006 | - | 99.3  | 0.75                      | 0.45 | 0.15 | 0.40 |     |      |
| 9         | 52.21            | 0.494            | 2.29                           | 9.55  | 0.291 | 15.91 | 18.38 | 0.314             | -                | 0.013                         | 0.033                          | -     | 0.006 | - | 99.5  | 0.75                      | 0.46 | 0.15 | 0.39 |     |      |
| 10        | 51.86            | 0.536            | 2.78                           | 9.12  | 0.275 | 15.32 | 19.29 | 0.341             | -                | 0.016                         | 0.044                          | -     | -     | - | 99.6  | 0.76                      | 0.45 | 0.14 | 0.41 | 4.8 | 1181 |
| 11        | 50.45            | 0.722            | 3.89                           | 9.89  | 0.278 | 14.43 | 19.33 | 0.369             | -                | -                             | 0.057                          | 0.011 | -     | - | 99.4  | 0.75                      | 0.44 | 0.14 | 0.42 |     |      |
| 12        | 50.23            | 0.814            | 4.18                           | 9.50  | 0.235 | 14.47 | 19.59 | 0.427             | -                | 0.017                         | 0.065                          | -     | -     | - | 99.5  | 0.77                      | 0.44 | 0.13 | 0.43 | 5.9 | 1182 |
| 13        | 50.46            | 0.747            | 3.45                           | 9.80  | 0.315 | 14.78 | 19.62 | 0.38              | 0.003            | 0.035                         | 0.078                          | -     | -     | - | 99.7  | 0.78                      | 0.45 | 0.13 | 0.43 | 4.5 | 1174 |
| 14        | 51.31            | 0.633            | 3.38                           | 9.89  | 0.293 | 14.92 | 19.09 | 0.33              | 0.005            | 0.025                         | 0.02                           | 0.013 | 0.005 | - | 99.9  | 0.75                      | 0.44 | 0.15 | 0.41 |     |      |

|    |       |       |      |       |       |       |       |       |       |       |       |       |       |   |      |      |      |      |      |     |      |
|----|-------|-------|------|-------|-------|-------|-------|-------|-------|-------|-------|-------|-------|---|------|------|------|------|------|-----|------|
| 15 | 51.29 | 0.615 | 3.03 | 9.50  | 0.297 | 15.23 | 19.02 | 0.338 | -     | 0.02  | 0.084 | 0.032 | 0.015 | - | 99.5 | 0.76 | 0.45 | 0.14 | 0.41 | 4.7 | 1177 |
| 16 | 51.71 | 0.514 | 2.80 | 9.37  | 0.266 | 15.26 | 18.94 | 0.397 | -     | 0.027 | 0.093 | 0.013 | 0.002 | - | 99.4 | 0.76 | 0.45 | 0.14 | 0.40 | 5.7 | 1190 |
| 17 | 51.33 | 0.438 | 2.89 | 9.51  | 0.194 | 15.07 | 19.12 | 0.382 | -     | -     | 0.078 | 0.006 | -     | - | 99.0 | 0.76 | 0.45 | 0.14 | 0.41 | 5.5 | 1186 |
| 18 | 51.70 | 0.526 | 2.79 | 9.33  | 0.241 | 15.34 | 19.05 | 0.32  | -     | 0.047 | 0.085 | 0.042 | -     | - | 99.5 | 0.76 | 0.45 | 0.15 | 0.40 | 4.6 | 1177 |
| 19 | 51.61 | 0.529 | 2.47 | 9.81  | 0.296 | 15.75 | 18.13 | 0.326 | -     | 0.03  | 0.041 | -     | -     | - | 99.0 | 0.76 | 0.47 | 0.15 | 0.38 | 4.7 | 1179 |
| 20 | 49.89 | 0.793 | 4.59 | 10.60 | 0.234 | 13.85 | 18.54 | 0.565 | -     | -     | 0.013 | -     | -     | - | 99.1 | 0.73 | 0.43 | 0.16 | 0.41 |     |      |
| 50 | 50.09 | 0.61  | 3.80 | 10.59 | 0.268 | 14.33 | 18.72 | 0.485 | -     | 0.041 | 0.033 | 0.045 | -     | - | 99.0 | 0.75 | 0.44 | 0.14 | 0.41 |     |      |
| 51 | 50.62 | 0.561 | 3.60 | 9.32  | 0.235 | 14.71 | 19.41 | 0.417 | -     | 0.049 | 0.091 | 0.016 | -     | - | 99.0 | 0.77 | 0.45 | 0.13 | 0.42 | 5.9 | 1188 |
| 52 | 51.34 | 0.532 | 2.81 | 8.86  | 0.198 | 15.21 | 19.68 | 0.276 | -     | 0.035 | 0.094 | -     | 0.006 | - | 99.0 | 0.77 | 0.45 | 0.13 | 0.42 | 3.5 | 1167 |
| 53 | 50.32 | 0.565 | 4.61 | 7.74  | 0.201 | 14.86 | 19.98 | 0.428 | -     | 0.038 | 0.539 | 0.028 | -     | - | 99.3 | 0.81 | 0.45 | 0.11 | 0.44 | 5.9 | 1199 |
| 54 | 49.25 | 0.795 | 5.06 | 8.96  | 0.248 | 14.05 | 19.96 | 0.394 | -     | 0.02  | 0.041 | -     | 0.01  | - | 98.8 | 0.78 | 0.44 | 0.12 | 0.44 | 5.8 | 1178 |
| 55 | 50.10 | 0.734 | 4.18 | 9.39  | 0.235 | 14.73 | 19.51 | 0.428 | -     | 0.036 | 0.009 | 0.029 | -     | - | 99.4 | 0.79 | 0.45 | 0.12 | 0.43 | 5.8 | 1185 |
| 56 | 49.77 | 0.659 | 3.92 | 8.76  | 0.233 | 14.53 | 19.31 | 0.393 | 0.013 | 0.023 | 0.254 | -     | 0.007 | - | 97.9 | 0.78 | 0.45 | 0.13 | 0.43 | 5.4 | 1186 |
| 57 | 50.79 | 0.595 | 4.06 | 9.02  | 0.177 | 14.75 | 19.51 | 0.467 | -     | 0.038 | 0.166 | 0.057 | 0.003 | - | 99.6 | 0.78 | 0.45 | 0.13 | 0.42 | 6.7 | 1197 |
| 58 | 50.51 | 0.645 | 3.84 | 9.37  | 0.221 | 14.32 | 19.79 | 0.451 | 0.003 | 0.036 | 0.196 | 0.027 | -     | - | 99.4 | 0.77 | 0.44 | 0.13 | 0.43 | 6.1 | 1188 |
| 59 | 50.10 | 0.75  | 4.03 | 10.14 | 0.207 | 14.03 | 18.92 | 0.545 | -     | 0.044 | 0.022 | -     | 0.005 | - | 98.8 | 0.74 | 0.43 | 0.15 | 0.42 |     |      |
| 60 | 50.63 | 0.753 | 3.44 | 9.35  | 0.236 | 14.77 | 19.34 | 0.318 | 0.002 | 0.058 | 0.057 | -     | -     | - | 98.9 | 0.76 | 0.44 | 0.14 | 0.42 | 4.5 | 1169 |
| 61 | 50.18 | 0.777 | 4.04 | 10.68 | 0.208 | 14.12 | 18.76 | 0.504 | -     | 0.051 | 0.02  | 0.011 | 0.012 | - | 99.4 | 0.74 | 0.43 | 0.15 | 0.41 |     |      |
| 84 | 51.54 | 0.506 | 2.50 | 10.16 | 0.312 | 15.33 | 18.75 | 0.387 | 0.009 | 0.007 | 0.015 | -     | -     | - | 99.5 | 0.76 | 0.46 | 0.14 | 0.40 | 5.0 | 1183 |

16BG11-4@

|   |       |       |      |       |       |       |       |       |       |       |       |       |       |   |       |      |      |      |      |     |      |
|---|-------|-------|------|-------|-------|-------|-------|-------|-------|-------|-------|-------|-------|---|-------|------|------|------|------|-----|------|
| 1 | 50.95 | 0.752 | 3.88 | 9.89  | 0.283 | 14.53 | 18.96 | 0.436 | -     | 0.013 | 0.044 | -     | 0.005 | - | 99.7  | 0.74 | 0.44 | 0.15 | 0.41 |     |      |
| 2 | 51.31 | 0.622 | 3.05 | 10.08 | 0.256 | 14.97 | 18.94 | 0.386 | -     | 0.034 | 0.043 | 0.004 | 0.003 | - | 99.7  | 0.75 | 0.45 | 0.15 | 0.41 |     |      |
| 3 | 52.29 | 0.659 | 2.50 | 9.39  | 0.277 | 15.29 | 19.23 | 0.319 | 0.005 | -     | -     | 0.001 | -     | - | 100.0 | 0.74 | 0.44 | 0.15 | 0.40 |     |      |
| 4 | 51.74 | 0.617 | 2.86 | 10.26 | 0.31  | 15.08 | 18.70 | 0.344 | -     | 0.034 | -     | 0.01  | -     | - | 100.0 | 0.74 | 0.44 | 0.16 | 0.40 | 5.4 | 1177 |
| 5 | 51.43 | 0.735 | 3.20 | 10.19 | 0.288 | 14.82 | 18.78 | 0.457 | -     | 0.006 | 0.011 | 0.002 | 0.004 | - | 99.9  | 0.74 | 0.44 | 0.16 | 0.40 |     |      |
| 6 | 52.11 | 0.655 | 2.63 | 9.57  | 0.282 | 15.33 | 18.77 | 0.388 | -     | 0.004 | 0.017 | -     | -     | - | 99.8  | 0.74 | 0.45 | 0.16 | 0.40 |     |      |

|    |       |       |      |       |       |       |       |       |       |       |       |       |       |   |       |      |      |      |      |     |      |
|----|-------|-------|------|-------|-------|-------|-------|-------|-------|-------|-------|-------|-------|---|-------|------|------|------|------|-----|------|
| 7  | 51.68 | 0.551 | 2.75 | 9.46  | 0.305 | 15.44 | 18.80 | 0.338 | 0.007 | 0.038 | 0.026 | 0.001 | -     | - | 99.4  | 0.76 | 0.46 | 0.15 | 0.40 | 5.0 | 1182 |
| 8  | 51.68 | 0.707 | 3.10 | 9.52  | 0.204 | 14.95 | 19.31 | 0.365 | 0.003 | 0.035 | 0.106 | 0.001 | 0.017 | - | 100.0 | 0.74 | 0.44 | 0.15 | 0.41 |     |      |
| 9  | 52.17 | 0.574 | 3.03 | 10.17 | 0.353 | 14.80 | 18.37 | 0.436 | -     | 0.026 | -     | 0.01  | -     | - | 99.9  | 0.71 | 0.44 | 0.18 | 0.39 |     |      |
| 10 | 51.86 | 0.65  | 2.73 | 9.65  | 0.275 | 15.31 | 18.58 | 0.276 | -     | 0.009 | 0.026 | -     | -     | - | 99.4  | 0.73 | 0.45 | 0.16 | 0.39 |     |      |
| 22 | 51.20 | 0.626 | 3.74 | 10.37 | 0.266 | 14.45 | 18.75 | 0.499 | -     | 0.003 | -     | 0.001 | -     | - | 99.9  | 0.73 | 0.43 | 0.16 | 0.41 |     |      |
| 23 | 51.69 | 0.63  | 3.19 | 9.72  | 0.282 | 14.74 | 18.95 | 0.474 | -     | 0.036 | 0.026 | 0.013 | 0.027 | - | 99.8  | 0.74 | 0.44 | 0.16 | 0.41 |     |      |
| 24 | 51.69 | 0.514 | 2.69 | 9.17  | 0.263 | 15.28 | 19.34 | 0.32  | -     | 0.026 | 0.02  | -     | -     | - | 99.3  | 0.76 | 0.45 | 0.14 | 0.41 | 4.6 | 1179 |
| 25 | 51.91 | 0.588 | 2.94 | 9.30  | 0.295 | 15.32 | 18.91 | 0.343 | 0.001 | 0.021 | 0.083 | 0.046 | 0.015 | - | 99.8  | 0.75 | 0.45 | 0.15 | 0.40 |     |      |
| 26 | 51.93 | 0.584 | 3.16 | 9.54  | 0.271 | 14.74 | 19.22 | 0.324 | 0.005 | 0.021 | 0.002 | -     | -     | - | 99.8  | 0.73 | 0.43 | 0.16 | 0.40 |     |      |
| 27 | 50.97 | 0.568 | 3.48 | 9.74  | 0.26  | 14.12 | 19.60 | 0.434 | 0.003 | 0.001 | 0.015 | 0.007 | -     | - | 99.2  | 0.74 | 0.43 | 0.15 | 0.42 |     |      |
| 28 | 50.87 | 0.768 | 3.44 | 9.47  | 0.284 | 14.81 | 19.16 | 0.402 | -     | 0.024 | 0.013 | 0.004 | -     | - | 99.2  | 0.76 | 0.44 | 0.14 | 0.41 | 5.9 | 1185 |
| 29 | 51.56 | 0.66  | 3.20 | 9.62  | 0.227 | 14.72 | 19.33 | 0.413 | 0.006 | 0.038 | 0.072 | 0.016 | -     | - | 99.9  | 0.74 | 0.44 | 0.15 | 0.41 |     |      |
| 30 | 51.75 | 0.765 | 3.11 | 9.59  | 0.338 | 14.62 | 19.22 | 0.356 | 0.015 | 0.028 | 0.063 | -     | -     | - | 99.9  | 0.73 | 0.43 | 0.16 | 0.41 |     |      |
| 31 | 51.94 | 0.607 | 3.07 | 9.77  | 0.277 | 15.10 | 18.81 | 0.411 | -     | 0.011 | 0.031 | -     | -     | - | 100.0 | 0.74 | 0.45 | 0.16 | 0.40 |     |      |

---

17BG03-1@

|    |       |       |      |      |       |       |       |       |       |       |       |       |   |       |       |      |      |      |      |     |      |
|----|-------|-------|------|------|-------|-------|-------|-------|-------|-------|-------|-------|---|-------|-------|------|------|------|------|-----|------|
| 1  | 52.54 | 0.579 | 2.58 | 8.69 | 0.249 | 15.26 | 19.47 | 0.452 | 0.015 | 0.045 | 0.013 | 0.022 | - | 0.005 | 99.9  | 0.76 | 0.45 | 0.14 | 0.41 | 6.2 | 1201 |
| 2  | 52.29 | 0.617 | 2.94 | 8.49 | 0.249 | 15.44 | 19.43 | 0.457 | -     | 0.026 | 0.05  | 0.026 | - | -     | 100.0 | 0.77 | 0.45 | 0.14 | 0.41 | 6.4 | 1203 |
| 3  | 52.57 | 0.289 | 3.20 | 5.96 | 0.149 | 15.75 | 21.20 | 0.339 | -     | 0.002 | 0.331 | 0.045 | - | -     | 99.8  | 0.82 | 0.46 | 0.10 | 0.44 | 4.5 | 1199 |
| 4  | 50.68 | 0.644 | 4.42 | 9.56 | 0.325 | 13.91 | 19.50 | 0.599 | -     | 0.014 | 0.15  | 0.01  | - | 0.005 | 99.8  | 0.75 | 0.43 | 0.14 | 0.43 | 8.6 | 1208 |
| 5  | 50.90 | 0.621 | 4.42 | 9.88 | 0.235 | 14.07 | 19.20 | 0.49  | -     | 0.024 | 0.126 | 0.021 | - | 0.002 | 100.0 | 0.73 | 0.43 | 0.16 | 0.42 | 8.0 | 1198 |
| 6  | 51.02 | 0.608 | 3.45 | 9.77 | 0.231 | 14.41 | 19.32 | 0.437 | -     | 0.041 | 0.058 | 0.009 | - | -     | 99.4  | 0.74 | 0.43 | 0.15 | 0.42 |     |      |
| 7  | 51.28 | 0.7   | 3.73 | 9.35 | 0.235 | 14.49 | 19.50 | 0.49  | -     | 0.021 | 0.009 | 0.046 | - | 0.007 | 99.9  | 0.75 | 0.43 | 0.14 | 0.42 | 7.3 | 1197 |
| 8  | 53.10 | 0.267 | 2.56 | 6.82 | 0.218 | 16.32 | 20.04 | 0.305 | 0.023 | 0.044 | 0.167 | 0.037 | - | 0.004 | 99.9  | 0.80 | 0.47 | 0.12 | 0.41 | 4.0 | 1197 |
| 9  | 53.53 | 0.268 | 2.61 | 6.55 | 0.183 | 16.55 | 20.15 | 0.387 | 0.001 | 0.024 | 0.239 | 0.007 | - | -     | 100.5 | 0.81 | 0.47 | 0.11 | 0.41 | 5.2 | 1213 |
| 10 | 53.04 | 0.328 | 2.77 | 6.14 | 0.193 | 16.12 | 20.66 | 0.296 | 0.011 | 0.035 | 0.221 | 0.002 | - | -     | 99.8  | 0.81 | 0.46 | 0.11 | 0.43 | 3.9 | 1194 |
| 11 | 52.29 | 0.66  | 3.15 | 7.31 | 0.208 | 15.74 | 20.16 | 0.397 | -     | 0.054 | 0.128 | 0.001 | - | -     | 100.1 | 0.80 | 0.46 | 0.12 | 0.42 | 5.2 | 1198 |

|    |       |       |      |       |       |       |       |       |       |       |       |       |   |       |       |      |      |      |      |     |      |
|----|-------|-------|------|-------|-------|-------|-------|-------|-------|-------|-------|-------|---|-------|-------|------|------|------|------|-----|------|
| 12 | 53.16 | 0.291 | 2.98 | 6.04  | 0.128 | 15.81 | 21.38 | 0.337 | 0.006 | -     | 0.235 | -     | - | -     | 100.4 | 0.81 | 0.45 | 0.11 | 0.44 | 4.4 | 1197 |
| 13 | 51.08 | 0.717 | 4.59 | 8.35  | 0.197 | 14.51 | 19.74 | 0.51  | 0.008 | 0.022 | 0.123 | 0.004 | - | 0.003 | 99.9  | 0.76 | 0.44 | 0.14 | 0.43 | 7.8 | 1206 |
| 14 | 50.79 | 0.718 | 4.04 | 10.03 | 0.256 | 14.43 | 19.31 | 0.439 | -     | 0.001 | 0.009 | -     | - | 0.012 | 100.0 | 0.75 | 0.44 | 0.15 | 0.42 | 6.7 | 1187 |
| 15 | 51.53 | 0.65  | 3.56 | 10.00 | 0.264 | 14.39 | 19.37 | 0.411 | -     | 0.012 | 0.072 | 0.02  | - | -     | 100.3 | 0.73 | 0.43 | 0.16 | 0.41 |     |      |
| 26 | 51.47 | 0.728 | 3.32 | 9.54  | 0.225 | 14.71 | 19.17 | 0.416 | 0.015 | 0.035 | 0.059 | -     | - | 0.013 | 99.7  | 0.74 | 0.44 | 0.15 | 0.41 |     |      |
| 27 | 51.56 | 0.72  | 3.14 | 9.90  | 0.249 | 15.00 | 19.02 | 0.338 | -     | 0.021 | 0.028 | -     | - | -     | 100.0 | 0.74 | 0.44 | 0.16 | 0.40 |     |      |
| 28 | 51.37 | 0.669 | 2.97 | 10.24 | 0.273 | 14.83 | 18.82 | 0.382 | -     | 0.062 | -     | -     | - | -     | 99.6  | 0.74 | 0.44 | 0.16 | 0.40 |     |      |
| 29 | 52.15 | 0.566 | 2.63 | 9.57  | 0.3   | 15.27 | 18.94 | 0.328 | -     | 0.005 | 0.041 | 0.035 | - | -     | 99.8  | 0.74 | 0.45 | 0.16 | 0.40 |     |      |
| 30 | 51.30 | 0.787 | 2.87 | 9.72  | 0.355 | 15.10 | 18.66 | 0.367 | -     | 0.049 | 0.067 | -     | - | -     | 99.3  | 0.75 | 0.45 | 0.15 | 0.40 | 5.3 | 1180 |
| 31 | 52.01 | 0.654 | 2.87 | 10.18 | 0.271 | 15.06 | 18.62 | 0.366 | -     | 0.002 | 0.084 | -     | - | 0.01  | 100.1 | 0.73 | 0.44 | 0.17 | 0.39 |     |      |
| 32 | 52.42 | 0.679 | 2.51 | 10.42 | 0.306 | 15.05 | 18.38 | 0.355 | 0.01  | -     | 0.028 | 0.007 | - | 0.009 | 100.2 | 0.71 | 0.44 | 0.18 | 0.38 |     |      |
| 33 | 50.58 | 0.682 | 4.02 | 10.93 | 0.261 | 14.13 | 18.70 | 0.605 | -     | 0.012 | 0.03  | -     | - | -     | 99.9  | 0.74 | 0.43 | 0.15 | 0.41 |     |      |
| 34 | 51.96 | 0.583 | 2.68 | 10.47 | 0.304 | 15.06 | 18.30 | 0.379 | -     | 0.022 | 0.015 | 0.031 | - | 0.001 | 99.8  | 0.72 | 0.44 | 0.17 | 0.39 |     |      |
| 35 | 52.34 | 0.58  | 2.46 | 10.15 | 0.271 | 15.38 | 18.37 | 0.339 | 0.002 | 0.019 | 0.004 | -     | - | 0.007 | 99.9  | 0.73 | 0.45 | 0.17 | 0.38 |     |      |
| 36 | 52.33 | 0.634 | 2.33 | 9.98  | 0.3   | 15.58 | 18.52 | 0.333 | 0.005 | 0.004 | 0.041 | 0.048 | - | -     | 100.1 | 0.74 | 0.45 | 0.16 | 0.39 |     |      |
| 37 | 52.37 | 0.465 | 2.33 | 10.35 | 0.324 | 15.51 | 18.44 | 0.375 | 0.011 | 0.031 | 0.039 | -     | - | 0.011 | 100.3 | 0.74 | 0.45 | 0.16 | 0.39 |     |      |
| 38 | 50.54 | 0.637 | 4.11 | 10.13 | 0.278 | 14.14 | 18.69 | 0.492 | -     | 0.025 | 0.009 | -     | - | -     | 99.0  | 0.73 | 0.43 | 0.16 | 0.41 |     |      |
| 39 | 51.62 | 0.502 | 3.15 | 10.04 | 0.198 | 14.59 | 18.69 | 0.35  | 0.02  | 0.035 | 0.034 | 0.003 | - | -     | 99.2  | 0.72 | 0.43 | 0.17 | 0.40 |     |      |
| 40 | 50.72 | 0.832 | 4.12 | 11.49 | 0.251 | 13.77 | 18.27 | 0.613 | 0.016 | -     | 0.013 | 0.002 | - | 0.004 | 100.1 | 0.70 | 0.42 | 0.18 | 0.40 |     |      |
| 71 | 52.58 | 0.398 | 3.23 | 6.11  | 0.134 | 15.77 | 21.00 | 0.344 | -     | -     | 0.343 | 0.026 | - | -     | 99.9  | 0.81 | 0.46 | 0.11 | 0.44 | 4.6 | 1198 |
| 75 | 50.82 | 0.694 | 3.52 | 9.85  | 0.259 | 14.41 | 19.46 | 0.344 | -     | 0.039 | 0.061 | 0.028 | - | -     | 99.5  | 0.74 | 0.43 | 0.15 | 0.42 |     |      |
| 76 | 50.03 | 0.692 | 4.67 | 10.81 | 0.274 | 13.75 | 18.67 | 0.48  | -     | 0.028 | 0.059 | 0.024 | - | -     | 99.5  | 0.72 | 0.42 | 0.16 | 0.41 |     |      |
| 77 | 49.70 | 0.754 | 5.32 | 8.86  | 0.169 | 13.85 | 20.32 | 0.337 | 0.002 | 0.016 | 0.116 | -     | - | -     | 99.4  | 0.76 | 0.42 | 0.13 | 0.45 | 5.7 | 1172 |
| 78 | 50.02 | 0.704 | 4.85 | 8.93  | 0.215 | 14.08 | 20.02 | 0.443 | -     | 0.029 | 0.055 | 0.025 | - | 0.004 | 99.4  | 0.77 | 0.43 | 0.13 | 0.44 | 6.8 | 1190 |
| 79 | 50.32 | 0.86  | 4.34 | 10.18 | 0.251 | 14.04 | 19.11 | 0.426 | -     | 0.022 | 0.067 | 0.022 | - | 0.001 | 99.6  | 0.73 | 0.43 | 0.16 | 0.42 |     |      |
| 80 | 49.48 | 0.765 | 5.17 | 10.14 | 0.223 | 13.40 | 19.39 | 0.47  | 0.002 | 0.037 | 0.12  | -     | - | -     | 99.2  | 0.73 | 0.42 | 0.15 | 0.43 |     |      |

|           |       |       |      |       |       |       |       |       |       |       |       |       |   |       |       |      |      |      |      |     |      |
|-----------|-------|-------|------|-------|-------|-------|-------|-------|-------|-------|-------|-------|---|-------|-------|------|------|------|------|-----|------|
| 81        | 52.38 | 0.437 | 2.38 | 9.75  | 0.275 | 15.40 | 19.02 | 0.346 | 0.006 | 0.023 | 0.078 | -     | - | -     | 100.1 | 0.75 | 0.45 | 0.15 | 0.40 | 5.0 | 1183 |
| 17BG03-2@ |       |       |      |       |       |       |       |       |       |       |       |       |   |       |       |      |      |      |      |     |      |
| 1         | 52.54 | 0.496 | 2.13 | 8.61  | 0.278 | 15.44 | 20.02 | 0.295 | -     | 0.031 | -     | -     | - | 0.004 | 99.8  | 0.77 | 0.45 | 0.14 | 0.42 | 3.9 | 1178 |
| 2         | 51.34 | 0.642 | 3.04 | 10.47 | 0.334 | 14.85 | 18.66 | 0.392 | -     | 0.012 | 0.065 | 0.03  | - | -     | 99.8  | 0.74 | 0.44 | 0.16 | 0.40 |     |      |
| 3         | 51.63 | 0.626 | 2.70 | 9.69  | 0.297 | 15.32 | 18.51 | 0.359 | 0.008 | 0.039 | 0.046 | -     | - | 0.003 | 99.2  | 0.75 | 0.45 | 0.15 | 0.39 |     |      |
| 4         | 51.76 | 0.602 | 2.82 | 9.51  | 0.313 | 15.22 | 18.95 | 0.379 | -     | 0.022 | 0.048 | -     | - | -     | 99.6  | 0.75 | 0.45 | 0.15 | 0.40 | 5.9 | 1190 |
| 5         | 52.01 | 0.536 | 2.72 | 9.09  | 0.248 | 15.00 | 19.54 | 0.308 | -     | 0.005 | 0.02  | 0.013 | - | -     | 99.5  | 0.74 | 0.44 | 0.15 | 0.41 |     |      |
| 6         | 51.75 | 0.646 | 2.73 | 9.76  | 0.314 | 14.69 | 18.88 | 0.412 | -     | 0.02  | 0.002 | -     | - | -     | 99.2  | 0.73 | 0.43 | 0.16 | 0.40 |     |      |
| 7         | 50.87 | 0.719 | 3.60 | 9.95  | 0.303 | 14.37 | 19.16 | 0.394 | -     | 0.017 | -     | -     | - | -     | 99.4  | 0.74 | 0.43 | 0.15 | 0.41 |     |      |
| 8         | 51.63 | 0.749 | 3.08 | 10.10 | 0.274 | 14.79 | 18.90 | 0.339 | 0.002 | 0.019 | 0.011 | -     | - | -     | 99.9  | 0.73 | 0.44 | 0.16 | 0.40 |     |      |
| 9         | 51.20 | 0.592 | 3.08 | 9.94  | 0.243 | 14.70 | 19.27 | 0.361 | 0.003 | 0.031 | 0.022 | -     | - | -     | 99.4  | 0.75 | 0.44 | 0.15 | 0.41 |     |      |
| 10        | 51.08 | 0.691 | 3.39 | 9.40  | 0.22  | 14.32 | 20.10 | 0.409 | -     | 0.026 | 0.048 | 0.006 | - | 0.014 | 99.7  | 0.75 | 0.43 | 0.14 | 0.43 |     |      |
| 14        | 50.98 | 0.696 | 4.17 | 10.38 | 0.229 | 13.89 | 18.72 | 0.477 | 0.001 | 0.01  | 0.047 | 0.027 | - | -     | 99.6  | 0.70 | 0.42 | 0.18 | 0.41 |     |      |
| 15        | 52.54 | 0.634 | 2.32 | 9.70  | 0.259 | 15.37 | 19.10 | 0.406 | 0.014 | 0.005 | 0.034 | -     | - | -     | 100.4 | 0.75 | 0.45 | 0.15 | 0.40 |     |      |
| 16        | 52.67 | 0.653 | 2.43 | 9.57  | 0.286 | 15.58 | 18.68 | 0.42  | 0.022 | 0.039 | 0.047 | -     | - | 0.011 | 100.4 | 0.74 | 0.45 | 0.16 | 0.39 |     |      |
| 17        | 52.50 | 0.468 | 2.35 | 9.39  | 0.363 | 15.71 | 18.49 | 0.392 | -     | 0.037 | 0.019 | -     | - | -     | 99.7  | 0.75 | 0.46 | 0.15 | 0.39 |     |      |
| 18        | 51.33 | 0.813 | 3.79 | 9.63  | 0.271 | 14.46 | 19.21 | 0.355 | 0.009 | 0.049 | 0.08  | -     | - | -     | 100.0 | 0.72 | 0.43 | 0.16 | 0.41 |     |      |
| 19        | 50.47 | 0.79  | 4.73 | 10.33 | 0.25  | 13.96 | 18.66 | 0.526 | 0.004 | 0.048 | 0.122 | 0.01  | - | -     | 99.9  | 0.72 | 0.43 | 0.16 | 0.41 |     |      |
| 39        | 51.68 | 0.705 | 2.91 | 10.02 | 0.299 | 15.05 | 18.61 | 0.37  | -     | 0.018 | 0.007 | 0.032 | - | 0.01  | 99.7  | 0.73 | 0.44 | 0.16 | 0.39 |     |      |
| 40        | 51.56 | 0.652 | 3.17 | 9.31  | 0.25  | 14.89 | 19.56 | 0.308 | -     | 0.042 | 0.037 | 0.009 | - | -     | 99.8  | 0.75 | 0.44 | 0.15 | 0.41 |     |      |
| 41        | 51.86 | 0.576 | 3.06 | 9.96  | 0.266 | 15.21 | 18.56 | 0.32  | 0.008 | 0.006 | 0.065 | 0.003 | - | 0.002 | 99.9  | 0.73 | 0.45 | 0.16 | 0.39 |     |      |
| 42        | 51.25 | 0.727 | 3.61 | 9.03  | 0.232 | 14.68 | 19.59 | 0.422 | 0.002 | 0.019 | 0.035 | -     | - | 0.008 | 99.6  | 0.76 | 0.44 | 0.14 | 0.42 | 6.6 | 1193 |
| 43        | 51.50 | 0.536 | 3.75 | 9.81  | 0.208 | 14.58 | 18.68 | 0.411 | 0.015 | 0.024 | 0.039 | -     | - | -     | 99.5  | 0.72 | 0.43 | 0.17 | 0.40 |     |      |
| 44        | 51.12 | 0.674 | 3.93 | 9.97  | 0.27  | 14.56 | 19.07 | 0.336 | -     | 0.021 | 0.087 | 0.007 | - | -     | 100.0 | 0.73 | 0.43 | 0.16 | 0.41 | 6.2 | 1179 |
| 45        | 50.79 | 0.709 | 3.87 | 10.98 | 0.302 | 14.49 | 18.30 | 0.529 | -     | 0.008 | 0.026 | 0.042 | - | 0.001 | 100.0 | 0.73 | 0.44 | 0.16 | 0.40 |     |      |
| 46        | 51.69 | 0.578 | 3.39 | 9.70  | 0.25  | 14.98 | 18.66 | 0.414 | -     | 0.034 | 0.028 | 0.033 | - | -     | 99.7  | 0.74 | 0.44 | 0.16 | 0.40 |     |      |

|    |       |       |      |      |       |       |       |       |       |       |       |       |   |   |       |      |      |      |      |
|----|-------|-------|------|------|-------|-------|-------|-------|-------|-------|-------|-------|---|---|-------|------|------|------|------|
| 47 | 51.27 | 0.712 | 3.60 | 9.39 | 0.288 | 14.54 | 19.77 | 0.376 | 0.004 | 0.012 | 0.035 | -     | - | - | 100.0 | 0.75 | 0.43 | 0.14 | 0.42 |
| 48 | 51.25 | 0.74  | 3.19 | 9.90 | 0.241 | 14.72 | 19.19 | 0.383 | -     | 0.003 | 0.004 | 0.018 | - | - | 99.6  | 0.74 | 0.44 | 0.15 | 0.41 |

17BG03-3@

|    |       |       |      |       |       |       |       |       |       |       |       |       |   |       |       |      |      |      |      |     |      |
|----|-------|-------|------|-------|-------|-------|-------|-------|-------|-------|-------|-------|---|-------|-------|------|------|------|------|-----|------|
| 1  | 52.53 | 0.659 | 2.49 | 10.34 | 0.338 | 15.45 | 17.79 | 0.33  | -     | 0.03  | 0.043 | 0.004 | - | 0.006 | 100.0 | 0.71 | 0.45 | 0.18 | 0.37 |     |      |
| 2  | 52.62 | 0.603 | 2.30 | 9.38  | 0.285 | 15.33 | 19.24 | 0.372 | -     | 0.031 | 0.009 | -     | - | -     | 100.2 | 0.74 | 0.44 | 0.15 | 0.40 |     |      |
| 3  | 50.90 | 0.928 | 3.76 | 9.67  | 0.28  | 14.62 | 19.04 | 0.471 | 0.008 | -     | 0.087 | -     | - | 0.006 | 99.8  | 0.75 | 0.44 | 0.15 | 0.41 | 6.5 | 1190 |
| 4  | 51.73 | 0.65  | 3.26 | 9.38  | 0.269 | 14.72 | 19.38 | 0.383 | -     | 0.008 | 0.052 | -     | - | 0.002 | 99.8  | 0.74 | 0.43 | 0.15 | 0.41 | 6.0 | 1184 |
| 5  | 51.11 | 0.736 | 4.04 | 9.85  | 0.224 | 14.53 | 18.85 | 0.494 | -     | -     | 0.033 | 0.003 | - | 0.001 | 99.9  | 0.74 | 0.44 | 0.16 | 0.41 |     |      |
| 6  | 51.30 | 0.724 | 3.42 | 9.55  | 0.256 | 14.66 | 19.32 | 0.403 | -     | 0.006 | 0.028 | -     | - | 0.007 | 99.7  | 0.74 | 0.44 | 0.15 | 0.41 |     |      |
| 7  | 51.42 | 0.632 | 3.27 | 9.89  | 0.25  | 14.78 | 18.85 | 0.383 | -     | 0.005 | 0.048 | 0.023 | - | -     | 99.5  | 0.73 | 0.44 | 0.16 | 0.40 |     |      |
| 8  | 51.11 | 0.768 | 3.46 | 10.08 | 0.296 | 14.67 | 18.85 | 0.334 | -     | 0.027 | 0.004 | -     | - | 0.01  | 99.6  | 0.73 | 0.44 | 0.16 | 0.40 |     |      |
| 9  | 50.62 | 0.857 | 4.27 | 10.05 | 0.222 | 14.17 | 18.72 | 0.47  | -     | 0.019 | 0.054 | 0.001 | - | 0.002 | 99.5  | 0.72 | 0.43 | 0.16 | 0.41 |     |      |
| 10 | 50.68 | 0.696 | 4.25 | 10.21 | 0.266 | 14.11 | 18.57 | 0.5   | 0.009 | 0.016 | 0.05  | -     | - | 0.011 | 99.4  | 0.72 | 0.43 | 0.16 | 0.41 |     |      |
| 11 | 52.15 | 0.493 | 2.91 | 8.98  | 0.258 | 14.79 | 19.47 | 0.351 | 0.003 | -     | 0.026 | -     | - | 0.007 | 99.4  | 0.73 | 0.43 | 0.16 | 0.41 |     |      |
| 12 | 51.69 | 0.751 | 3.40 | 9.19  | 0.326 | 14.76 | 19.58 | 0.306 | 0.011 | 0.034 | 0.09  | 0.019 | - | -     | 100.2 | 0.74 | 0.43 | 0.15 | 0.41 |     |      |
| 13 | 51.70 | 0.7   | 3.61 | 9.23  | 0.241 | 14.97 | 19.11 | 0.424 | -     | -     | 0.051 | 0.023 | - | -     | 100.1 | 0.75 | 0.44 | 0.15 | 0.41 | 6.6 | 1193 |
| 14 | 51.81 | 0.741 | 3.34 | 9.09  | 0.259 | 14.80 | 19.24 | 0.398 | -     | 0.031 | 0.105 | 0.019 | - | -     | 99.8  | 0.74 | 0.44 | 0.16 | 0.41 | 6.2 | 1188 |
| 15 | 51.07 | 0.801 | 3.61 | 9.67  | 0.31  | 14.83 | 18.88 | 0.377 | 0.002 | 0.008 | 0.041 | 0.042 | - | -     | 99.6  | 0.74 | 0.44 | 0.15 | 0.40 |     |      |
| 16 | 51.45 | 0.718 | 3.39 | 10.02 | 0.266 | 14.88 | 18.40 | 0.364 | -     | 0.021 | 0.046 | 0.023 | - | -     | 99.6  | 0.72 | 0.44 | 0.17 | 0.39 |     |      |
| 17 | 51.16 | 0.75  | 3.24 | 10.32 | 0.282 | 14.66 | 18.60 | 0.358 | -     | -     | -     | -     | - | -     | 99.4  | 0.72 | 0.44 | 0.17 | 0.40 |     |      |
| 18 | 51.43 | 0.744 | 3.19 | 10.50 | 0.306 | 14.93 | 18.06 | 0.418 | 0.011 | -     | 0.006 | 0.016 | - | 0.007 | 99.6  | 0.72 | 0.44 | 0.17 | 0.39 |     |      |
| 19 | 51.43 | 0.546 | 3.26 | 10.70 | 0.295 | 14.51 | 18.17 | 0.514 | -     | 0.054 | -     | -     | - | -     | 99.5  | 0.72 | 0.44 | 0.17 | 0.39 |     |      |
| 20 | 50.70 | 0.716 | 4.22 | 11.03 | 0.282 | 13.70 | 18.32 | 0.654 | -     | -     | 0.039 | 0.024 | - | -     | 99.7  | 0.71 | 0.42 | 0.17 | 0.40 |     |      |
| 34 | 52.04 | 0.44  | 2.38 | 9.30  | 0.313 | 15.27 | 19.17 | 0.38  | 0.002 | 0.022 | 0.065 | 0.026 | - | -     | 99.4  | 0.76 | 0.45 | 0.14 | 0.41 | 5.2 | 1189 |
| 35 | 50.45 | 0.807 | 4.38 | 9.92  | 0.254 | 14.03 | 18.89 | 0.62  | 0.002 | 0.029 | 0.046 | -     | - | -     | 99.4  | 0.74 | 0.43 | 0.15 | 0.42 |     |      |
| 36 | 51.64 | 0.647 | 3.35 | 8.80  | 0.193 | 14.72 | 19.75 | 0.332 | 0.019 | 0.012 | 0.072 | 0.027 | - | -     | 99.6  | 0.74 | 0.43 | 0.15 | 0.42 |     |      |

|     |       |       |      |       |       |       |       |       |       |       |       |       |   |       |       |      |      |      |      |     |      |
|-----|-------|-------|------|-------|-------|-------|-------|-------|-------|-------|-------|-------|---|-------|-------|------|------|------|------|-----|------|
| 68  | 51.16 | 0.752 | 3.77 | 9.91  | 0.275 | 14.35 | 18.74 | 0.49  | 0.001 | -     | 0.101 | 0.021 | - | -     | 99.6  | 0.72 | 0.43 | 0.16 | 0.40 |     |      |
| 69  | 51.34 | 0.798 | 3.62 | 9.59  | 0.282 | 14.51 | 19.52 | 0.329 | 0.01  | 0.026 | 0.054 | 0.035 | - | 0.002 | 100.1 | 0.73 | 0.43 | 0.16 | 0.41 |     |      |
| 70  | 50.32 | 0.755 | 4.71 | 8.83  | 0.215 | 14.49 | 19.54 | 0.416 | 0.024 | 0.023 | 0.308 | 0.027 | - | 0.002 | 99.7  | 0.77 | 0.44 | 0.13 | 0.43 | 6.0 | 1190 |
| 71  | 50.71 | 0.721 | 3.74 | 9.65  | 0.266 | 14.46 | 19.22 | 0.396 | 0.003 | -     | 0.054 | 0.014 | - | -     | 99.2  | 0.75 | 0.44 | 0.15 | 0.42 | 6.0 | 1183 |
| 72  | 51.37 | 0.739 | 3.43 | 9.58  | 0.265 | 14.68 | 19.22 | 0.441 | 0.008 | 0.037 | 0.032 | -     | - | -     | 99.8  | 0.74 | 0.44 | 0.15 | 0.41 |     |      |
| 73  | 51.38 | 0.853 | 3.48 | 9.55  | 0.242 | 14.69 | 19.41 | 0.361 | -     | 0.03  | 0.06  | -     | - | 0.015 | 100.1 | 0.74 | 0.43 | 0.15 | 0.41 |     |      |
| 74  | 50.36 | 0.725 | 3.15 | 9.76  | 0.277 | 14.25 | 19.39 | 0.351 | -     | 0.031 | 0.039 | 0.008 | - | -     | 98.3  | 0.74 | 0.43 | 0.15 | 0.42 |     |      |
| 75  | 51.42 | 0.738 | 3.39 | 9.63  | 0.239 | 14.67 | 18.83 | 0.522 | 0.003 | 0.019 | 0.028 | 0.008 | - | 0.002 | 99.5  | 0.74 | 0.44 | 0.15 | 0.41 |     |      |
| 76  | 52.40 | 0.583 | 1.95 | 9.14  | 0.315 | 15.71 | 18.90 | 0.308 | -     | -     | 0.009 | -     | - | -     | 99.3  | 0.75 | 0.46 | 0.15 | 0.39 | 4.0 | 1177 |
| 77  | 51.46 | 0.844 | 3.14 | 9.64  | 0.244 | 14.53 | 19.17 | 0.4   | -     | 0.024 | 0.011 | -     | - | -     | 99.5  | 0.73 | 0.43 | 0.16 | 0.41 |     |      |
| 78  | 51.76 | 0.523 | 2.73 | 9.48  | 0.278 | 15.06 | 18.89 | 0.315 | -     | 0.009 | 0.03  | 0.004 | - | 0.011 | 99.1  | 0.74 | 0.44 | 0.16 | 0.40 |     |      |
| 79  | 51.74 | 0.589 | 3.06 | 9.27  | 0.29  | 14.84 | 19.01 | 0.436 | -     | 0.016 | 0.047 | 0.026 | - | 0.009 | 99.3  | 0.74 | 0.44 | 0.15 | 0.41 |     |      |
| 80  | 51.75 | 0.668 | 2.98 | 8.88  | 0.263 | 15.01 | 18.72 | 0.366 | -     | 0.018 | 0.017 | 0.004 | - | -     | 98.7  | 0.73 | 0.44 | 0.16 | 0.40 |     |      |
| 81  | 51.80 | 0.709 | 2.87 | 9.24  | 0.253 | 15.18 | 19.08 | 0.337 | -     | 0.006 | 0.058 | -     | - | -     | 99.5  | 0.75 | 0.45 | 0.15 | 0.40 | 5.0 | 1178 |
| 82  | 52.11 | 0.674 | 2.62 | 10.03 | 0.304 | 15.54 | 18.40 | 0.321 | -     | -     | 0.043 | 0.002 | - | 0.008 | 100.1 | 0.74 | 0.45 | 0.16 | 0.39 |     |      |
| 109 | 51.02 | 0.709 | 3.56 | 9.51  | 0.299 | 14.67 | 19.07 | 0.4   | -     | 0.003 | 0.054 | -     | - | -     | 99.3  | 0.75 | 0.44 | 0.15 | 0.41 | 6.1 | 1186 |
| 110 | 50.72 | 0.879 | 3.82 | 9.82  | 0.245 | 14.37 | 18.84 | 0.468 | 0.005 | 0.002 | 0.035 | 0.007 | - | 0.005 | 99.2  | 0.73 | 0.43 | 0.16 | 0.41 |     |      |
| 111 | 51.70 | 0.576 | 3.17 | 10.41 | 0.312 | 14.73 | 18.51 | 0.565 | 0.015 | 0.034 | 0.067 | 0.04  | - | -     | 100.1 | 0.74 | 0.44 | 0.16 | 0.40 |     |      |
| 112 | 50.65 | 0.722 | 3.89 | 10.48 | 0.278 | 13.96 | 18.93 | 0.548 | -     | 0.023 | 0.013 | 0.014 | - | -     | 99.5  | 0.73 | 0.43 | 0.16 | 0.42 |     |      |
| 113 | 50.73 | 0.868 | 3.86 | 10.05 | 0.237 | 14.33 | 18.81 | 0.539 | -     | 0.019 | 0.044 | 0.007 | - | -     | 99.5  | 0.74 | 0.44 | 0.15 | 0.41 |     |      |



3.3. Table S3: Representative orthopyroxene major element compositions (wt%) from the Nakoulai mafic dikes.

| Spot      | SiO <sub>2</sub> | TiO <sub>2</sub> | Al <sub>2</sub> O <sub>3</sub> | FeO   | MnO   | MgO   | CaO  | Na <sub>2</sub> O | K <sub>2</sub> O | P <sub>2</sub> O <sub>5</sub> | Cr <sub>2</sub> O <sub>3</sub> | NiO   | Cl    | F | Total   | Mg/(Mg+Fe <sup>2+</sup> ) | En   | Fs   | Wo   |
|-----------|------------------|------------------|--------------------------------|-------|-------|-------|------|-------------------|------------------|-------------------------------|--------------------------------|-------|-------|---|---------|---------------------------|------|------|------|
| 16BG11-2@ |                  |                  |                                |       |       |       |      |                   |                  |                               |                                |       |       |   |         |                           |      |      |      |
| 47        | 53.31            | 0.342            | 0.71                           | 19.50 | 0.541 | 22.71 | 2.04 | 0.077             | 0.015            | 0.018                         | -                              | 0.01  | -     | - | 99.278  | 0.67                      | 0.64 | 0.32 | 0.04 |
| 48        | 53.38            | 0.362            | 0.84                           | 18.60 | 0.519 | 23.65 | 2.15 | 0.022             | -                | -                             | 0.029                          | -     | 0.002 | - | 99.559  | 0.69                      | 0.66 | 0.29 | 0.04 |
| 62        | 53.88            | 0.263            | 1.33                           | 17.21 | 0.435 | 24.72 | 1.80 | 0.03              | 0.007            | 0.004                         | 0.036                          | 0.001 | 0.011 | - | 99.723  | 0.71                      | 0.69 | 0.28 | 0.04 |
| 63        | 52.98            | 0.25             | 2.29                           | 17.82 | 0.377 | 24.34 | 1.75 | 0.037             | -                | 0.008                         | 0.017                          | -     | 0.003 | - | 99.864  | 0.71                      | 0.69 | 0.28 | 0.04 |
| 64        | 52.90            | 0.375            | 2.66                           | 17.50 | 0.37  | 24.12 | 1.73 | 0.061             | -                | 0.012                         | 0.027                          | -     | 0.001 | - | 99.752  | 0.71                      | 0.68 | 0.28 | 0.04 |
| 65        | 52.13            | 0.351            | 2.71                           | 17.58 | 0.407 | 23.90 | 1.76 | 0.052             | 0.004            | 0.023                         | -                              | 0.016 | -     | - | 98.929  | 0.71                      | 0.69 | 0.28 | 0.04 |
| 66        | 52.12            | 0.291            | 3.03                           | 17.63 | 0.377 | 24.16 | 1.64 | 0.023             | -                | 0.024                         | 0.008                          | -     | -     | - | 99.29   | 0.72                      | 0.69 | 0.27 | 0.03 |
| 67        | 52.31            | 0.327            | 2.78                           | 18.25 | 0.438 | 23.96 | 1.69 | 0.042             | -                | -                             | 0.01                           | 0.028 | -     | - | 99.84   | 0.71                      | 0.69 | 0.28 | 0.03 |
| 68        | 52.22            | 0.399            | 2.94                           | 18.09 | 0.409 | 23.99 | 1.68 | 0.021             | -                | 0.003                         | 0.004                          | 0.042 | 0.007 | - | 99.795  | 0.71                      | 0.69 | 0.28 | 0.03 |
| 69        | 52.23            | 0.339            | 2.93                           | 18.68 | 0.393 | 23.64 | 1.70 | 0.056             | 0.019            | 0.008                         | 0.044                          | 0.006 | 0.001 | - | 100.048 | 0.70                      | 0.68 | 0.29 | 0.04 |
| 70        | 53.52            | 0.257            | 1.72                           | 17.90 | 0.432 | 24.35 | 1.74 | 0.068             | 0.018            | 0.012                         | 0.027                          | -     | 0.003 | - | 100.037 | 0.71                      | 0.68 | 0.28 | 0.04 |
| 71        | 52.79            | 0.339            | 3.31                           | 17.30 | 0.421 | 22.44 | 1.98 | 0.241             | 0.108            | 0.057                         | 0.023                          | 0.054 | -     | - | 99.06   | 0.68                      | 0.65 | 0.31 | 0.04 |
| 72        | 52.94            | 0.391            | 2.24                           | 17.75 | 0.511 | 24.05 | 1.98 | 0.062             | -                | 0.003                         | 0.017                          | 0.019 | 0.017 | - | 99.969  | 0.71                      | 0.68 | 0.28 | 0.04 |
| 73        | 53.32            | 0.363            | 1.58                           | 18.07 | 0.385 | 24.20 | 2.01 | 0.048             | 0.009            | 0.056                         | -                              | 0.003 | 0.004 | - | 100.041 | 0.71                      | 0.68 | 0.28 | 0.04 |
| 16BG11-4@ |                  |                  |                                |       |       |       |      |                   |                  |                               |                                |       |       |   |         |                           |      |      |      |
| 38        | 53.14            | 0.405            | 2.37                           | 17.76 | 0.359 | 24.41 | 1.87 | 0.039             | -                | 0.033                         | -                              | 0.029 | -     | - | 100.421 | 0.71                      | 0.69 | 0.28 | 0.04 |
| 17BG03-1@ |                  |                  |                                |       |       |       |      |                   |                  |                               |                                |       |       |   |         |                           |      |      |      |
| 51        | 52.60            | 0.306            | 2.83                           | 18.28 | 0.398 | 23.72 | 1.67 | 0.025             | 0.003            | 0.02                          | 0.025                          | 0.007 | -     | - | 99.864  | 0.70                      | 0.67 | 0.29 | 0.03 |
| 52        | 54.29            | 0.247            | 1.75                           | 16.54 | 0.427 | 25.05 | 1.73 | 0.04              | -                | 0.033                         | 0.048                          | 0.018 | -     | - | 100.169 | 0.72                      | 0.69 | 0.27 | 0.03 |
| 53        | 53.25            | 0.31             | 2.69                           | 17.24 | 0.398 | 23.92 | 1.69 | 0.094             | -                | 0.013                         | 0.033                          | -     | -     | - | 99.622  | 0.70                      | 0.68 | 0.29 | 0.03 |
| 72        | 54.59            | 0.267            | 1.10                           | 16.74 | 0.434 | 25.05 | 1.73 | 0.038             | -                | -                             | 0.032                          | 0.01  | -     | - | 99.999  | 0.71                      | 0.69 | 0.28 | 0.03 |
| 73        | 53.45            | 0.198            | 2.21                           | 17.17 | 0.385 | 24.59 | 1.62 | 0.026             | 0.004            | 0.03                          | 0.059                          | -     | -     | - | 99.737  | 0.71                      | 0.69 | 0.28 | 0.03 |

|     |       |       |      |       |       |       |      |       |       |       |       |       |   |       |         |      |      |      |      |
|-----|-------|-------|------|-------|-------|-------|------|-------|-------|-------|-------|-------|---|-------|---------|------|------|------|------|
| 74  | 53.99 | 0.222 | 1.64 | 16.04 | 0.351 | 25.00 | 1.45 | 0.054 | 0.002 | -     | 0.048 | 0.004 | - | -     | 98.791  | 0.72 | 0.69 | 0.28 | 0.03 |
| 82  | 53.76 | 0.137 | 1.99 | 17.96 | 0.415 | 24.19 | 1.45 | 0.041 | -     | 0.007 | 0.04  | 0.006 | - | 0.012 | 100.003 | 0.70 | 0.68 | 0.29 | 0.03 |
| 89  | 53.93 | 0.372 | 1.74 | 17.17 | 0.404 | 24.24 | 1.79 | 0.039 | -     | -     | 0.006 | 0.021 | - | 0.003 | 99.706  | 0.70 | 0.67 | 0.29 | 0.04 |
| 90  | 53.47 | 0.299 | 2.23 | 17.39 | 0.362 | 24.25 | 1.80 | 0.072 | -     | 0.003 | 0.002 | 0.007 | - | 0.009 | 99.888  | 0.71 | 0.68 | 0.28 | 0.04 |
| 91  | 53.43 | 0.262 | 2.57 | 17.10 | 0.452 | 24.23 | 1.68 | 0.08  | -     | 0.015 | 0.023 | 0.02  | - | -     | 99.858  | 0.71 | 0.68 | 0.28 | 0.03 |
| 92  | 53.87 | 0.355 | 2.05 | 16.93 | 0.378 | 24.62 | 1.85 | 0.041 | 0.002 | -     | 0.029 | 0.002 | - | -     | 100.132 | 0.71 | 0.68 | 0.28 | 0.04 |
| 93  | 52.82 | 0.321 | 2.61 | 18.04 | 0.378 | 23.82 | 1.65 | 0.07  | 0.022 | 0.022 | 0.085 | 0.043 | - | 0.015 | 99.89   | 0.70 | 0.68 | 0.29 | 0.03 |
| 94  | 54.23 | 0.253 | 1.60 | 17.42 | 0.378 | 24.53 | 1.72 | 0.032 | 0.005 | -     | 0.029 | 0.005 | - | -     | 100.211 | 0.70 | 0.68 | 0.29 | 0.03 |
| 95  | 53.06 | 0.313 | 2.65 | 17.59 | 0.414 | 24.02 | 1.71 | 0.069 | -     | -     | 0.002 | -     | - | -     | 99.83   | 0.70 | 0.68 | 0.29 | 0.03 |
| 96  | 54.33 | 0.236 | 1.42 | 16.98 | 0.406 | 24.41 | 1.74 | 0.027 | -     | -     | 0.048 | 0.002 | - | 0.003 | 99.589  | 0.70 | 0.67 | 0.29 | 0.03 |
| 97  | 53.71 | 0.206 | 2.09 | 16.75 | 0.423 | 24.50 | 1.88 | 0.033 | -     | 0.013 | 0.006 | 0.025 | - | 0.007 | 99.642  | 0.71 | 0.68 | 0.28 | 0.04 |
| 98  | 53.00 | 0.388 | 2.64 | 17.45 | 0.415 | 24.05 | 1.74 | 0.054 | 0.002 | -     | 0.042 | 0.007 | - | 0.009 | 99.805  | 0.71 | 0.68 | 0.28 | 0.04 |
| 99  | 53.48 | 0.413 | 2.20 | 16.83 | 0.412 | 24.30 | 1.81 | 0.062 | 0.001 | -     | 0.023 | 0.01  | - | 0.006 | 99.542  | 0.71 | 0.68 | 0.28 | 0.04 |
| 100 | 53.74 | 0.165 | 1.78 | 17.55 | 0.383 | 24.37 | 1.76 | 0.024 | -     | -     | -     | 0.028 | - | -     | 99.802  | 0.70 | 0.68 | 0.28 | 0.04 |
| 101 | 52.76 | 0.274 | 2.89 | 18.04 | 0.404 | 23.92 | 1.72 | 0.032 | 0.007 | -     | 0.006 | 0.03  | - | -     | 100.09  | 0.70 | 0.68 | 0.29 | 0.04 |
| 102 | 53.40 | 0.355 | 2.18 | 16.90 | 0.42  | 24.47 | 1.73 | 0.034 | -     | 0.012 | 0.078 | 0.018 | - | -     | 99.588  | 0.71 | 0.69 | 0.28 | 0.03 |
| 103 | 52.91 | 0.375 | 2.66 | 17.02 | 0.381 | 24.28 | 1.79 | 0.046 | 0.007 | 0.006 | 0.046 | 0.003 | - | -     | 99.532  | 0.71 | 0.69 | 0.28 | 0.04 |

---

17BG03-2@

|    |       |       |      |       |       |       |      |       |       |       |       |       |   |       |         |      |      |      |      |
|----|-------|-------|------|-------|-------|-------|------|-------|-------|-------|-------|-------|---|-------|---------|------|------|------|------|
| 27 | 54.40 | 0.19  | 1.49 | 17.19 | 0.396 | 24.39 | 1.72 | 0.073 | -     | 0.022 | -     | 0.004 | - | 0.003 | 99.879  | 0.70 | 0.67 | 0.29 | 0.03 |
| 28 | 53.61 | 0.325 | 2.26 | 16.61 | 0.402 | 24.34 | 1.66 | 0.049 | 0.001 | -     | 0.035 | 0.024 | - | 0.004 | 99.317  | 0.70 | 0.68 | 0.29 | 0.03 |
| 29 | 53.57 | 0.317 | 2.32 | 16.96 | 0.375 | 24.65 | 1.67 | 0.061 | 0.009 | -     | 0.023 | 0.018 | - | -     | 99.959  | 0.71 | 0.69 | 0.28 | 0.03 |
| 30 | 54.52 | 0.163 | 1.41 | 17.00 | 0.402 | 24.98 | 1.76 | 0.057 | 0.014 | 0.037 | 0.017 | 0.029 | - | 0.001 | 100.391 | 0.71 | 0.69 | 0.28 | 0.03 |
| 31 | 54.72 | 0.254 | 1.73 | 16.74 | 0.364 | 25.06 | 1.74 | 0.083 | 0.006 | -     | -     | 0.059 | - | 0.002 | 100.755 | 0.71 | 0.69 | 0.28 | 0.03 |
| 32 | 53.92 | 0.218 | 1.94 | 16.86 | 0.422 | 24.12 | 1.71 | 0.038 | -     | 0.002 | 0.045 | 0.014 | - | -     | 99.281  | 0.69 | 0.67 | 0.29 | 0.03 |
| 33 | 54.48 | 0.412 | 1.45 | 17.78 | 0.409 | 24.24 | 1.91 | 0.075 | 0.004 | 0.025 | 0.015 | 0.005 | - | 0.003 | 100.808 | 0.69 | 0.67 | 0.29 | 0.04 |
| 34 | 54.77 | 0.294 | 0.97 | 16.84 | 0.479 | 24.43 | 1.98 | 0.061 | 0.007 | -     | -     | -     | - | -     | 99.822  | 0.70 | 0.67 | 0.29 | 0.04 |

|    |       |       |      |       |       |       |      |       |       |       |       |       |   |       |         |      |      |      |      |
|----|-------|-------|------|-------|-------|-------|------|-------|-------|-------|-------|-------|---|-------|---------|------|------|------|------|
| 35 | 54.15 | 0.323 | 2.16 | 15.99 | 0.425 | 24.99 | 1.84 | 0.055 | -     | 0.004 | 0.034 | 0.009 | - | 0.013 | 99.981  | 0.72 | 0.69 | 0.27 | 0.04 |
| 36 | 54.51 | 0.343 | 1.46 | 17.21 | 0.416 | 24.63 | 1.92 | 0.09  | -     | -     | -     | 0.036 | - | 0.009 | 100.617 | 0.71 | 0.68 | 0.28 | 0.04 |
| 37 | 53.95 | 0.327 | 1.91 | 17.21 | 0.38  | 24.19 | 1.75 | 0.05  | -     | 0.027 | 0.052 | -     | - | -     | 99.842  | 0.70 | 0.67 | 0.29 | 0.04 |
| 55 | 54.13 | 0.302 | 1.90 | 17.06 | 0.389 | 24.59 | 1.76 | 0.042 | 0.006 | -     | 0.021 | -     | - | 0.009 | 100.204 | 0.71 | 0.68 | 0.28 | 0.04 |
| 56 | 54.42 | 0.19  | 1.50 | 16.95 | 0.407 | 24.69 | 1.74 | 0.046 | 0.007 | -     | 0.038 | 0.001 | - | -     | 99.979  | 0.71 | 0.68 | 0.28 | 0.03 |
| 57 | 53.48 | 0.282 | 2.32 | 17.20 | 0.42  | 24.11 | 1.78 | 0.057 | -     | -     | 0.021 | 0.04  | - | -     | 99.701  | 0.70 | 0.68 | 0.29 | 0.04 |
| 58 | 55.26 | 0.097 | 0.89 | 17.44 | 0.497 | 25.15 | 1.17 | 0.055 | -     | 0.004 | 0.017 | 0.038 | - | -     | 100.613 | 0.70 | 0.69 | 0.29 | 0.02 |
| 59 | 53.98 | 0.347 | 1.74 | 17.04 | 0.371 | 24.33 | 1.81 | 0.05  | -     | 0.017 | 0.096 | 0.013 | - | -     | 99.793  | 0.70 | 0.68 | 0.29 | 0.04 |
| 60 | 54.69 | 0.145 | 0.78 | 18.04 | 0.593 | 24.88 | 0.81 | 0.054 | -     | -     | 0.031 | 0.02  | - | 0.005 | 100.048 | 0.70 | 0.69 | 0.30 | 0.02 |
| 61 | 53.34 | 0.423 | 2.66 | 17.82 | 0.413 | 24.23 | 1.74 | 0.114 | 0.012 | 0.024 | -     | 0.025 | - | 0.011 | 100.808 | 0.71 | 0.68 | 0.28 | 0.04 |

17BG03-3@

|     |       |       |      |       |       |       |      |       |       |       |       |       |   |       |         |      |      |      |      |
|-----|-------|-------|------|-------|-------|-------|------|-------|-------|-------|-------|-------|---|-------|---------|------|------|------|------|
| 91  | 53.76 | 0.395 | 2.29 | 17.22 | 0.412 | 24.75 | 1.79 | 0.04  | -     | -     | 0.069 | 0.02  | - | 0.002 | 100.752 | 0.71 | 0.69 | 0.28 | 0.04 |
| 92  | 54.04 | 0.282 | 1.98 | 17.14 | 0.352 | 25.00 | 1.64 | 0.006 | -     | 0.015 | 0.031 | 0.012 | - | -     | 100.498 | 0.71 | 0.69 | 0.28 | 0.03 |
| 93  | 53.40 | 0.341 | 2.17 | 17.38 | 0.427 | 24.32 | 1.76 | 0.026 | -     | -     | 0.008 | -     | - | 0.005 | 99.832  | 0.71 | 0.68 | 0.28 | 0.04 |
| 94  | 54.15 | 0.313 | 1.68 | 17.08 | 0.373 | 24.74 | 1.75 | 0.062 | -     | -     | 0.044 | 0.004 | - | -     | 100.201 | 0.71 | 0.69 | 0.28 | 0.03 |
| 95  | 53.42 | 0.394 | 2.33 | 17.59 | 0.385 | 24.20 | 1.86 | 0.029 | -     | 0.013 | 0.023 | 0.019 | - | 0.007 | 100.259 | 0.70 | 0.68 | 0.29 | 0.04 |
| 96  | 54.08 | 0.265 | 1.65 | 17.27 | 0.428 | 24.52 | 1.74 | 0.035 | -     | 0.011 | 0.029 | -     | - | 0.003 | 100.033 | 0.70 | 0.68 | 0.29 | 0.03 |
| 97  | 53.87 | 0.298 | 2.28 | 16.45 | 0.389 | 24.11 | 1.84 | 0.065 | 0.013 | -     | -     | 0.01  | - | 0.013 | 99.332  | 0.70 | 0.67 | 0.29 | 0.04 |
| 98  | 53.50 | 0.233 | 1.95 | 18.62 | 0.461 | 23.21 | 1.85 | 0.039 | -     | 0.015 | 0.044 | 0.018 | - | 0.011 | 99.955  | 0.68 | 0.65 | 0.31 | 0.04 |
| 99  | 53.68 | 0.329 | 1.63 | 17.54 | 0.398 | 24.26 | 2.00 | 0.052 | 0.024 | -     | 0.006 | -     | - | -     | 99.925  | 0.71 | 0.68 | 0.28 | 0.04 |
| 100 | 53.86 | 0.322 | 1.93 | 17.28 | 0.423 | 24.31 | 1.68 | 0.085 | -     | 0.019 | -     | 0.048 | - | 0.013 | 99.967  | 0.70 | 0.68 | 0.29 | 0.03 |
| 101 | 53.75 | 0.395 | 1.89 | 17.24 | 0.429 | 24.28 | 1.76 | 0.065 | 0.011 | 0.001 | -     | 0.013 | - | 0.006 | 99.837  | 0.70 | 0.68 | 0.29 | 0.04 |
| 102 | 53.89 | 0.298 | 1.79 | 17.32 | 0.399 | 24.27 | 1.78 | 0.043 | -     | -     | 0.031 | 0.029 | - | -     | 99.847  | 0.70 | 0.67 | 0.29 | 0.04 |
| 103 | 53.63 | 0.238 | 1.91 | 17.12 | 0.396 | 24.10 | 1.78 | 0.074 | 0.002 | 0.011 | 0.025 | 0.018 | - | 0.009 | 99.308  | 0.70 | 0.68 | 0.29 | 0.04 |
| 104 | 53.78 | 0.238 | 2.24 | 16.07 | 0.351 | 25.03 | 1.65 | 0.069 | -     | 0.032 | -     | 0.027 | - | -     | 99.489  | 0.72 | 0.70 | 0.27 | 0.03 |
| 105 | 53.22 | 0.29  | 3.13 | 16.91 | 0.376 | 24.62 | 1.59 | 0.056 | 0.005 | -     | 0.023 | 0.009 | - | -     | 100.22  | 0.72 | 0.69 | 0.27 | 0.03 |

|     |       |       |      |       |      |       |      |       |       |       |       |      |   |   |         |      |      |      |      |
|-----|-------|-------|------|-------|------|-------|------|-------|-------|-------|-------|------|---|---|---------|------|------|------|------|
| 106 | 53.24 | 0.282 | 3.33 | 16.71 | 0.36 | 24.60 | 1.60 | 0.053 | -     | -     | 0.031 | -    | - | - | 100.199 | 0.72 | 0.69 | 0.27 | 0.03 |
| 107 | 52.72 | 0.402 | 3.10 | 17.30 | 0.36 | 24.15 | 1.78 | 0.042 | 0.006 | -     | -     | 0.01 | - | - | 99.874  | 0.71 | 0.69 | 0.28 | 0.04 |
| 108 | 54.73 | 0.262 | 1.81 | 15.85 | 0.38 | 25.19 | 1.64 | 0.071 | -     | 0.004 | -     | -    | - | - | 99.938  | 0.71 | 0.69 | 0.28 | 0.03 |

3.4. Table S4: Representative plagioclase phenocryst and inclusion major element compositions (wt%) and Sr isotope data from the Nakoulai mafic dikes.

| Spot      | Type       | SiO <sub>2</sub> | TiO <sub>2</sub> | Al <sub>2</sub> O <sub>3</sub> | FeO   | MnO   | MgO   | CaO   | Na <sub>2</sub> O | K <sub>2</sub> O | P <sub>2</sub> O <sub>5</sub> | Cr <sub>2</sub> O <sub>3</sub> | NiO   | Cl    | F | Total |
|-----------|------------|------------------|------------------|--------------------------------|-------|-------|-------|-------|-------------------|------------------|-------------------------------|--------------------------------|-------|-------|---|-------|
| 16BG11-2@ |            |                  |                  |                                |       |       |       |       |                   |                  |                               |                                |       |       |   |       |
| 21        | Inclusion  | 50.88            | 0.029            | 30.43                          | 0.708 | -     | 0.084 | 14.11 | 3.41              | 0.216            | 0.027                         | 0.033                          | -     | 0.004 | - | 99.9  |
| 22        | Inclusion  | 50.16            | -                | 30.91                          | 0.67  | -     | 0.074 | 14.52 | 3.04              | 0.187            | -                             | -                              | 0.004 | 0.003 | - | 99.6  |
| 23        | Inclusion  | 52.63            | 0.059            | 28.86                          | 0.676 | 0.015 | 0.091 | 12.72 | 4.09              | 0.288            | -                             | -                              | 0.002 | 0.005 | - | 99.4  |
| 24        | Inclusion  | 49.92            | -                | 30.61                          | 0.654 | -     | 0.078 | 14.79 | 3.16              | 0.206            | 0.04                          | 0.051                          | 0.019 | -     | - | 99.5  |
| 25        | Inclusion  | 53.72            | 0.054            | 28.52                          | 0.661 | -     | 0.065 | 11.78 | 4.53              | 0.396            | 0.015                         | 0.013                          | 0.038 | 0.002 | - | 99.8  |
| 26        | Inclusion  | 52.43            | -                | 28.87                          | 0.543 | 0.008 | 0.072 | 12.49 | 4.24              | 0.32             | -                             | -                              | -     | -     | - | 99.0  |
| 27        | Inclusion  | 53.42            | 0.004            | 28.36                          | 0.548 | -     | 0.089 | 11.82 | 4.38              | 0.383            | -                             | 0.009                          | -     | 0.009 | - | 99.0  |
| 28        | Inclusion  | 51.15            | 0.029            | 29.97                          | 0.691 | 0.026 | 0.072 | 13.59 | 3.48              | 0.225            | -                             | 0.011                          | 0.007 | -     | - | 99.3  |
| 29        | Inclusion  | 51.70            | 0.025            | 29.80                          | 0.641 | 0.03  | 0.076 | 13.04 | 3.81              | 0.269            | 0.022                         | 0.02                           | -     | 0.001 | - | 99.4  |
| 30        | Inclusion  | 52.43            | 0.017            | 29.17                          | 0.685 | -     | 0.096 | 12.91 | 4.06              | 0.275            | -                             | 0.016                          | 0.019 | 0.004 | - | 99.7  |
| 31        | Inclusion  | 51.15            | 0.109            | 30.06                          | 0.658 | -     | 0.085 | 13.79 | 3.53              | 0.233            | 0.009                         | -                              | 0.005 | 0.003 | - | 99.6  |
| 32        | Inclusion  | 50.13            | 0.109            | 30.65                          | 0.667 | -     | 0.038 | 14.47 | 3.15              | 0.215            | -                             | -                              | -     | 0.151 | - | 99.5  |
| 41        | Phenocryst | 54.25            | 0.063            | 28.50                          | 0.572 | 0.007 | 0.05  | 11.38 | 4.81              | 0.38             | 0.043                         | 0.007                          | -     | -     | - | 100.1 |
| 42        | Phenocryst | 54.47            | -                | 28.31                          | 0.588 | -     | 0.08  | 11.43 | 4.79              | 0.378            | 0.058                         | -                              | -     | 0.002 | - | 100.1 |
| 43        | Phenocryst | 54.66            | 0.071            | 27.67                          | 0.518 | 0.013 | 0.075 | 11.01 | 5.10              | 0.439            | 0.04                          | -                              | 0.019 | -     | - | 99.6  |
| 44        | Phenocryst | 54.19            | 0.075            | 27.91                          | 0.574 | -     | 0.067 | 11.22 | 4.96              | 0.412            | 0.008                         | 0.029                          | -     | 0.003 | - | 99.4  |

|    |            |       |       |       |       |       |       |       |      |       |       |       |       |       |   |       |
|----|------------|-------|-------|-------|-------|-------|-------|-------|------|-------|-------|-------|-------|-------|---|-------|
| 45 | Phenocryst | 53.77 | 0.092 | 28.20 | 0.571 | 0.015 | 0.066 | 11.60 | 4.52 | 0.396 | 0.006 | -     | 0.031 | -     | - | 99.3  |
| 46 | Phenocryst | 53.89 | 0.088 | 28.11 | 0.649 | 0.018 | 0.054 | 11.40 | 4.76 | 0.428 | -     | 0.024 | -     | 0.014 | - | 99.4  |
| 77 | Phenocryst | 54.03 | 0.117 | 27.86 | 0.95  | 0.023 | 0.07  | 11.42 | 4.73 | 0.399 | 0.002 | -     | -     | 0.003 | - | 99.6  |
| 78 | Phenocryst | 51.74 | 0.063 | 30.07 | 0.565 | -     | 0.062 | 13.36 | 3.89 | 0.263 | 0.005 | -     | -     | -     | - | 100.0 |
| 79 | Phenocryst | 52.22 | -     | 29.65 | 0.602 | -     | 0.079 | 13.05 | 3.99 | 0.282 | 0.036 | -     | 0.012 | -     | - | 99.9  |
| 80 | Phenocryst | 52.15 | 0.121 | 29.46 | 0.709 | -     | 0.073 | 12.96 | 3.85 | 0.323 | 0.001 | 0.011 | 0.007 | -     | - | 99.7  |
| 81 | Phenocryst | 53.16 | 0.13  | 29.24 | 0.58  | 0.025 | 0.055 | 12.22 | 4.21 | 0.334 | -     | 0.027 | 0.006 | 0.008 | - | 100.0 |
| 82 | Phenocryst | 52.76 | 0.122 | 28.89 | 0.635 | -     | 0.064 | 12.92 | 4.02 | 0.291 | 0.04  | 0.018 | -     | 0.008 | - | 99.8  |

16BG11-4@

|    |            |       |       |       |       |       |       |       |      |       |       |       |       |       |   |       |
|----|------------|-------|-------|-------|-------|-------|-------|-------|------|-------|-------|-------|-------|-------|---|-------|
| 11 | Phenocryst | 54.21 | -     | 28.11 | 0.604 | -     | 0.073 | 11.24 | 4.81 | 0.396 | 0.002 | -     | -     | -     | - | 99.4  |
| 12 | Phenocryst | 52.73 | 0.096 | 29.54 | 0.575 | 0.015 | 0.049 | 12.71 | 4.20 | 0.353 | -     | -     | 0.023 | -     | - | 100.3 |
| 13 | Phenocryst | 54.45 | 0.038 | 28.04 | 0.58  | -     | 0.064 | 11.28 | 4.81 | 0.399 | -     | 0.002 | 0.006 | -     | - | 99.7  |
| 14 | Phenocryst | 52.80 | 0.046 | 29.15 | 0.592 | 0.002 | 0.067 | 12.48 | 4.41 | 0.309 | -     | -     | -     | -     | - | 99.9  |
| 15 | Phenocryst | 51.14 | 0.034 | 30.45 | 0.616 | 0.028 | 0.067 | 13.79 | 3.47 | 0.247 | -     | -     | 0.025 | 0.001 | - | 99.9  |
| 16 | Phenocryst | 53.26 | -     | 28.84 | 0.585 | -     | 0.081 | 12.05 | 4.54 | 0.343 | -     | 0.007 | -     | -     | - | 99.7  |
| 17 | Phenocryst | 49.88 | 0.067 | 31.30 | 0.626 | 0.033 | 0.063 | 14.73 | 3.04 | 0.171 | 0.009 | 0.018 | -     | -     | - | 99.9  |
| 18 | Phenocryst | 54.51 | -     | 28.02 | 0.605 | 0.025 | 0.076 | 11.19 | 4.82 | 0.396 | 0.027 | 0.04  | 0.01  | 0.001 | - | 99.7  |
| 32 | Phenocryst | 53.42 | 0.042 | 28.96 | 0.588 | 0.021 | 0.06  | 12.20 | 4.42 | 0.347 | 0.034 | 0.009 | -     | -     | - | 100.1 |
| 33 | Phenocryst | 52.43 | 0.08  | 29.81 | 0.612 | -     | 0.055 | 13.09 | 3.94 | 0.298 | 0.026 | -     | -     | -     | - | 100.3 |
| 34 | Phenocryst | 52.78 | 0.017 | 29.48 | 0.6   | -     | 0.063 | 12.72 | 4.37 | 0.298 | 0.016 | 0.029 | -     | 0.003 | - | 100.4 |
| 35 | Phenocryst | 51.26 | 0.042 | 30.57 | 0.574 | -     | 0.069 | 13.81 | 3.70 | 0.221 | 0.038 | 0.018 | 0.011 | 0.015 | - | 100.3 |
| 36 | Phenocryst | 52.76 | -     | 29.13 | 0.555 | 0.008 | 0.057 | 13.21 | 3.89 | 0.269 | 0.014 | 0.016 | -     | -     | - | 99.9  |
| 37 | Phenocryst | 54.15 | -     | 28.36 | 0.591 | 0.01  | 0.071 | 11.86 | 4.75 | 0.383 | 0.022 | -     | -     | -     | - | 100.2 |

17BG02-2@

|   |            |       |       |       |       |       |       |       |      |       |       |      |       |   |       |      |
|---|------------|-------|-------|-------|-------|-------|-------|-------|------|-------|-------|------|-------|---|-------|------|
| 4 | Phenocryst | 53.47 | 0.084 | 28.39 | 0.851 | -     | 0.078 | 12.12 | 4.42 | 0.342 | 0.017 | -    | 0.007 | - | -     | 99.8 |
| 5 | Phenocryst | 54.63 | 0.054 | 27.52 | 0.519 | 0.008 | 0.073 | 11.50 | 4.96 | 0.388 | 0.064 | 0.04 | 0.023 | - | 0.006 | 99.8 |

|    |            |       |       |       |       |       |       |       |      |       |       |       |       |   |       |       |
|----|------------|-------|-------|-------|-------|-------|-------|-------|------|-------|-------|-------|-------|---|-------|-------|
| 6  | Phenocryst | 53.96 | 0.063 | 27.81 | 0.53  | 0.02  | 0.053 | 11.69 | 4.79 | 0.437 | 0.044 | 0.004 | -     | - | 0.005 | 99.4  |
| 7  | Phenocryst | 53.69 | 0.025 | 28.61 | 0.503 | -     | 0.064 | 11.95 | 4.59 | 0.394 | 0.021 | 0.007 | -     | - | -     | 99.9  |
| 8  | Phenocryst | 53.98 | 0.033 | 28.43 | 0.537 | 0.031 | 0.074 | 12.06 | 4.39 | 0.377 | 0.015 | 0.011 | 0.001 | - | -     | 99.9  |
| 9  | Phenocryst | 53.69 | 0.042 | 28.14 | 0.45  | 0.033 | 0.078 | 12.18 | 4.41 | 0.413 | 0.007 | 0.004 | 0.02  | - | 0.001 | 99.5  |
| 10 | Phenocryst | 53.31 | 0.1   | 28.94 | 0.535 | 0.018 | 0.07  | 12.35 | 4.27 | 0.367 | 0.02  | -     | -     | - | 0.005 | 100.0 |
| 11 | Phenocryst | 54.47 | 0.058 | 27.60 | 0.493 | -     | 0.062 | 11.58 | 4.78 | 0.483 | 0.021 | 0.002 | 0.016 | - | 0.001 | 99.6  |
| 12 | Phenocryst | 53.88 | 0.1   | 28.32 | 0.501 | -     | 0.05  | 11.62 | 4.58 | 0.441 | 0.015 | 0.009 | 0.015 | - | 0.004 | 99.5  |
| 13 | Phenocryst | 52.94 | 0.083 | 28.46 | 0.767 | 0.002 | 0.086 | 12.58 | 4.28 | 0.325 | 0.016 | -     | 0.011 | - | 0.02  | 99.6  |
| 14 | Phenocryst | 52.75 | -     | 28.59 | 0.644 | -     | 0.071 | 12.99 | 4.00 | 0.287 | 0.065 | 0.029 | 0.008 | - | 0.002 | 99.4  |
| 15 | Phenocryst | 56.09 | 0.075 | 26.53 | 0.554 | 0.031 | 0.086 | 10.53 | 5.21 | 0.527 | 0.018 | 0.027 | -     | - | 0.001 | 99.7  |
| 16 | Phenocryst | 53.96 | 0.075 | 28.21 | 0.584 | -     | 0.076 | 11.95 | 4.58 | 0.399 | 0.031 | 0.02  | 0.027 | - | 0.007 | 99.9  |
| 17 | Phenocryst | 52.82 | 0.112 | 29.14 | 0.513 | 0.008 | 0.062 | 12.75 | 4.15 | 0.347 | 0.031 | 0.004 | 0.006 | - | 0.012 | 100.0 |
| 18 | Phenocryst | 54.33 | 0.05  | 28.02 | 0.564 | -     | 0.07  | 11.63 | 4.69 | 0.524 | 0.051 | 0.013 | -     | - | -     | 99.9  |
| 19 | Phenocryst | 53.63 | 0.066 | 28.47 | 0.581 | 0.01  | 0.068 | 12.08 | 4.40 | 0.383 | 0.058 | -     | -     | - | 0.009 | 99.8  |
| 20 | Phenocryst | 53.89 | -     | 28.45 | 0.548 | 0.013 | 0.065 | 11.83 | 4.47 | 0.411 | 0.033 | -     | 0.024 | - | -     | 99.7  |
| 21 | Phenocryst | 56.07 | 0.075 | 26.87 | 0.549 | -     | 0.073 | 10.38 | 5.21 | 0.531 | 0.047 | 0.02  | -     | - | -     | 99.8  |
| 22 | Phenocryst | 55.79 | 0.083 | 26.67 | 0.583 | -     | 0.067 | 10.56 | 5.27 | 0.482 | -     | 0.015 | 0.006 | - | -     | 99.5  |
| 23 | Phenocryst | 53.99 | 0.017 | 28.23 | 0.809 | 0.003 | 0.083 | 11.94 | 4.44 | 0.364 | 0.022 | 0.002 | 0.006 | - | -     | 99.9  |
| 24 | Phenocryst | 51.52 | 0.063 | 29.41 | 0.884 | 0.003 | 0.096 | 13.15 | 3.73 | 0.262 | 0.025 | -     | 0.01  | - | 0.005 | 99.2  |
| 25 | Phenocryst | 55.97 | 0.088 | 26.84 | 0.543 | 0.015 | 0.083 | 10.57 | 5.19 | 0.498 | 0.006 | 0.002 | 0.013 | - | 0.001 | 99.8  |
| 26 | Phenocryst | 54.56 | 0.054 | 27.41 | 0.685 | -     | 0.085 | 11.54 | 4.87 | 0.427 | 0.007 | -     | -     | - | 0.002 | 99.6  |
| 27 | Phenocryst | 53.12 | 0.017 | 28.48 | 0.457 | 0.008 | 0.071 | 12.67 | 4.28 | 0.32  | 0.017 | 0.009 | 0.003 | - | -     | 99.5  |
| 28 | Phenocryst | 54.35 | 0.025 | 28.23 | 0.573 | 0.02  | 0.049 | 11.58 | 4.72 | 0.389 | 0.03  | -     | -     | - | -     | 100.0 |
| 29 | Phenocryst | 55.55 | 0.075 | 26.85 | 0.547 | 0.007 | 0.08  | 10.90 | 5.04 | 0.496 | 0.029 | 0.009 | 0.035 | - | 0.004 | 99.6  |
| 30 | Phenocryst | 54.97 | 0.054 | 27.55 | 0.638 | 0.041 | 0.061 | 11.17 | 4.92 | 0.512 | 0.003 | 0.035 | 0.002 | - | 0.005 | 100.0 |
| 31 | Phenocryst | 53.46 | 0.058 | 28.43 | 0.591 | -     | 0.073 | 11.72 | 4.37 | 0.43  | 0.025 | -     | -     | - | 0.015 | 99.2  |

|    |            |       |       |       |       |       |       |       |      |       |       |       |   |   |   |      |
|----|------------|-------|-------|-------|-------|-------|-------|-------|------|-------|-------|-------|---|---|---|------|
| 32 | Phenocryst | 53.85 | 0.075 | 27.92 | 0.538 | 0.016 | 0.046 | 12.10 | 4.43 | 0.393 | 0.012 | -     | - | - | - | 99.4 |
| 33 | Phenocryst | 55.52 | -     | 26.93 | 0.542 | 0.023 | 0.066 | 10.81 | 5.16 | 0.463 | 0.018 | 0.031 | - | - | - | 99.6 |

17BG03-1@

|    |            |       |       |       |       |       |       |       |      |       |       |       |       |   |       |       |
|----|------------|-------|-------|-------|-------|-------|-------|-------|------|-------|-------|-------|-------|---|-------|-------|
| 16 | Phenocryst | 54.09 | 0.109 | 27.84 | 1.003 | -     | 0.13  | 11.81 | 4.72 | 0.372 | 0.036 | 0.038 | -     | - | -     | 100.1 |
| 17 | Phenocryst | 51.31 | 0.08  | 29.50 | 0.735 | 0.01  | 0.147 | 13.64 | 3.67 | 0.469 | 0.039 | 0.016 | 0.002 | - | 0.008 | 99.6  |
| 18 | Phenocryst | 53.66 | 0.046 | 28.49 | 0.71  | 0.008 | 0.082 | 12.35 | 4.33 | 0.381 | 0.019 | -     | 0.04  | - | -     | 100.1 |
| 19 | Phenocryst | 49.66 | -     | 31.20 | 0.593 | 0.01  | 0.065 | 15.15 | 2.98 | 0.183 | 0.059 | 0.016 | -     | - | 0.006 | 99.9  |
| 20 | Phenocryst | 54.62 | 0.046 | 27.64 | 0.553 | 0.002 | 0.069 | 11.65 | 4.63 | 0.383 | 0.031 | -     | 0.033 | - | -     | 99.7  |
| 21 | Phenocryst | 53.17 | 0.004 | 28.60 | 0.647 | 0.003 | 0.077 | 12.45 | 4.22 | 0.301 | 0.009 | 0.046 | 0.01  | - | -     | 99.5  |
| 22 | Phenocryst | 50.97 | 0.029 | 30.36 | 0.593 | 0.011 | 0.077 | 14.57 | 3.03 | 0.176 | 0.016 | -     | 0.013 | - | 0.006 | 99.9  |
| 23 | Phenocryst | 50.71 | 0.062 | 30.59 | 0.681 | 0.002 | 0.068 | 14.50 | 3.15 | 0.17  | 0.023 | 0.018 | 0.012 | - | -     | 100.0 |
| 24 | Phenocryst | 54.18 | 0.046 | 28.05 | 0.546 | -     | 0.063 | 11.93 | 4.39 | 0.353 | -     | 0.022 | -     | - | -     | 99.6  |
| 25 | Phenocryst | 54.90 | 0.108 | 27.40 | 0.981 | -     | 0.104 | 11.53 | 4.74 | 0.382 | 0.028 | -     | -     | - | 0.003 | 100.2 |
| 41 | Phenocryst | 52.00 | -     | 29.91 | 0.616 | -     | 0.096 | 13.51 | 3.55 | 0.243 | 0.022 | 0.011 | 0.009 | - | -     | 100.0 |
| 42 | Phenocryst | 54.61 | 0.078 | 27.90 | 0.554 | -     | 0.061 | 11.51 | 4.86 | 0.391 | 0.004 | -     | -     | - | -     | 100.0 |
| 43 | Phenocryst | 52.66 | 0.045 | 28.68 | 0.667 | 0.021 | 0.095 | 12.91 | 4.04 | 0.255 | 0.004 | 0.026 | 0.007 | - | 0.006 | 99.4  |
| 44 | Phenocryst | 50.28 | 0.004 | 30.48 | 0.569 | 0.032 | 0.057 | 14.91 | 2.87 | 0.179 | 0.043 | -     | -     | - | 0.01  | 99.4  |
| 45 | Phenocryst | 54.36 | 0.079 | 27.62 | 0.59  | -     | 0.089 | 11.61 | 4.69 | 0.376 | 0.031 | 0.015 | 0.013 | - | 0.006 | 99.5  |
| 46 | Phenocryst | 51.57 | 0.041 | 29.65 | 0.679 | -     | 0.073 | 13.77 | 3.42 | 0.234 | 0.001 | 0.024 | 0.013 | - | -     | 99.5  |
| 47 | Phenocryst | 55.05 | 0.087 | 27.59 | 0.615 | 0.002 | 0.08  | 11.24 | 5.00 | 0.366 | -     | -     | -     | - | -     | 100.0 |
| 48 | Phenocryst | 52.36 | 0.012 | 29.12 | 0.558 | 0.01  | 0.062 | 13.19 | 3.79 | 0.289 | 0.026 | 0.004 | 0.013 | - | 0.001 | 99.4  |
| 49 | Phenocryst | 53.41 | 0.054 | 28.07 | 1.244 | 0.015 | 0.606 | 11.86 | 4.06 | 0.478 | 0.033 | -     | 0.044 | - | 0.013 | 99.9  |
| 50 | Phenocryst | 51.42 | 0.095 | 29.69 | 0.605 | -     | 0.064 | 13.91 | 3.54 | 0.216 | 0.014 | 0.029 | -     | - | 0.009 | 99.6  |
| 54 | Phenocryst | 53.72 | 0.049 | 28.23 | 0.539 | 0.016 | 0.087 | 12.29 | 4.27 | 0.329 | 0.026 | -     | -     | - | 0.003 | 99.6  |
| 55 | Phenocryst | 53.74 | 0.099 | 28.15 | 0.638 | 0.023 | 0.096 | 12.04 | 4.22 | 0.326 | 0.012 | 0.007 | 0.005 | - | 0.009 | 99.4  |
| 56 | Phenocryst | 54.44 | 0.066 | 28.30 | 0.601 | 0.008 | 0.074 | 11.46 | 4.64 | 0.367 | 0.023 | 0.002 | -     | - | 0.004 | 100.0 |

|     |            |       |       |       |       |       |       |       |      |       |       |       |       |   |       |       |
|-----|------------|-------|-------|-------|-------|-------|-------|-------|------|-------|-------|-------|-------|---|-------|-------|
| 57  | Phenocryst | 53.29 | 0.079 | 28.60 | 0.564 | 0.04  | 0.073 | 12.42 | 3.96 | 0.316 | 0.029 | -     | -     | - | -     | 99.4  |
| 58  | Phenocryst | 53.56 | -     | 28.47 | 0.552 | 0.016 | 0.085 | 12.26 | 4.21 | 0.306 | -     | 0.002 | 0.027 | - | -     | 99.5  |
| 59  | Phenocryst | 53.15 | 0.058 | 28.47 | 0.6   | 0.002 | 0.067 | 12.39 | 4.32 | 0.319 | -     | -     | -     | - | 0.006 | 99.4  |
| 60  | Phenocryst | 52.85 | 0.025 | 29.28 | 0.671 | 0.021 | 0.079 | 12.50 | 3.98 | 0.303 | 0.012 | -     | 0.001 | - | -     | 99.7  |
| 61  | Phenocryst | 53.06 | 0.062 | 29.18 | 0.602 | -     | 0.093 | 12.57 | 4.04 | 0.282 | 0.001 | -     | -     | - | -     | 99.9  |
| 62  | Phenocryst | 52.99 | 0.083 | 29.18 | 0.572 | 0.008 | 0.087 | 12.53 | 4.09 | 0.296 | 0.013 | -     | 0.026 | - | -     | 99.9  |
| 63  | Phenocryst | 52.86 | -     | 28.97 | 0.62  | 0.039 | 0.07  | 12.80 | 4.10 | 0.291 | 0.027 | -     | -     | - | 0.01  | 99.8  |
| 64  | Phenocryst | 53.34 | -     | 28.49 | 0.58  | 0.016 | 0.09  | 12.66 | 4.10 | 0.454 | -     | -     | -     | - | 0.003 | 99.7  |
| 65  | Phenocryst | 54.03 | 0.025 | 28.45 | 0.589 | 0.044 | 0.073 | 11.86 | 4.47 | 0.34  | 0.033 | 0.011 | -     | - | 0.004 | 99.9  |
| 66  | Phenocryst | 53.65 | 0.008 | 28.15 | 0.517 | -     | 0.069 | 12.07 | 4.52 | 0.308 | 0.025 | 0.039 | 0.005 | - | -     | 99.4  |
| 67  | Phenocryst | 53.75 | 0.041 | 28.42 | 0.636 | 0.042 | 0.099 | 12.10 | 4.47 | 0.364 | 0.011 | 0.002 | -     | - | -     | 99.9  |
| 68  | Phenocryst | 53.79 | 0.033 | 28.60 | 0.624 | 0.011 | 0.057 | 11.90 | 4.62 | 0.327 | -     | -     | -     | - | -     | 100.0 |
| 85  | Inclusion  | 53.72 | 0.071 | 28.34 | 0.726 | -     | 0.077 | 11.86 | 4.59 | 0.252 | 0.018 | -     | -     | - | 0.005 | 99.7  |
| 86  | Inclusion  | 53.18 | 0.008 | 28.40 | 0.701 | 0.054 | 0.057 | 11.79 | 4.63 | 0.328 | 0.04  | 0.009 | -     | - | 0.018 | 99.2  |
| 105 | Inclusion  | 52.99 | 0.071 | 28.84 | 0.861 | 0.031 | 0.071 | 12.24 | 4.42 | 0.292 | 0.019 | -     | -     | - | -     | 99.8  |

17BG03-2@

|    |            |       |       |       |       |       |       |       |      |       |       |       |       |   |       |       |
|----|------------|-------|-------|-------|-------|-------|-------|-------|------|-------|-------|-------|-------|---|-------|-------|
| 23 | Phenocryst | 51.76 | -     | 29.83 | 0.743 | -     | 0.061 | 13.34 | 3.86 | 0.251 | 0.034 | -     | -     | - | 0.009 | 99.9  |
| 24 | Phenocryst | 52.46 | 0.033 | 29.51 | 0.621 | -     | 0.077 | 12.95 | 3.94 | 0.31  | 0.035 | -     | -     | - | -     | 99.9  |
| 25 | Phenocryst | 52.84 | -     | 29.36 | 0.616 | -     | 0.055 | 12.65 | 4.07 | 0.283 | 0.039 | 0.007 | 0.001 | - | -     | 99.9  |
| 26 | Phenocryst | 53.79 | 0.033 | 28.64 | 0.637 | 0.027 | 0.068 | 12.19 | 4.21 | 0.333 | -     | -     | 0.005 | - | -     | 99.9  |
| 49 | Phenocryst | 54.28 | 0.025 | 28.53 | 0.594 | -     | 0.066 | 11.96 | 4.43 | 0.347 | 0.041 | 0.018 | -     | - | 0.004 | 100.3 |
| 50 | Phenocryst | 53.96 | 0.058 | 28.55 | 0.624 | 0.044 | 0.047 | 12.02 | 4.58 | 0.328 | 0.012 | 0.035 | -     | - | 0.003 | 100.3 |
| 51 | Phenocryst | 53.33 | 0.025 | 29.15 | 0.521 | -     | 0.077 | 12.41 | 4.24 | 0.274 | 0.029 | 0.011 | 0.032 | - | 0.006 | 100.1 |
| 52 | Phenocryst | 54.07 | -     | 28.33 | 0.553 | -     | 0.065 | 11.80 | 4.33 | 0.324 | 0.043 | -     | 0.027 | - | -     | 99.5  |
| 53 | Phenocryst | 54.44 | 0.033 | 28.46 | 0.58  | 0.02  | 0.087 | 11.87 | 4.67 | 0.329 | 0.009 | -     | 0.019 | - | 0.021 | 100.5 |
| 54 | Phenocryst | 53.74 | 0.1   | 28.76 | 0.554 | 0.021 | 0.072 | 12.19 | 4.28 | 0.301 | 0.015 | 0.02  | 0.031 | - | -     | 100.1 |



## 17BG03-3@

|    |            |       |       |       |       |       |       |       |      |       |       |       |       |   |       |       |
|----|------------|-------|-------|-------|-------|-------|-------|-------|------|-------|-------|-------|-------|---|-------|-------|
| 24 | Inclusion  | 53.68 | 0.054 | 28.52 | 0.728 | -     | 0.079 | 12.39 | 4.29 | 0.323 | -     | 0.016 | -     | - | 0.007 | 100.1 |
| 25 | Inclusion  | 53.28 | 0.059 | 28.63 | 0.678 | 0.008 | 0.087 | 12.78 | 3.91 | 0.269 | 0.035 | -     | 0.007 | - | -     | 99.7  |
| 26 | Inclusion  | 52.73 | 0.038 | 28.90 | 0.682 | 0.011 | 0.078 | 12.92 | 4.10 | 0.266 | 0.006 | 0.049 | -     | - | -     | 99.8  |
| 27 | Inclusion  | 53.32 | 0.104 | 28.38 | 0.609 | 0.002 | 0.06  | 12.53 | 4.48 | 0.307 | -     | -     | -     | - | -     | 99.8  |
| 28 | Inclusion  | 52.92 | 0.033 | 28.32 | 0.712 | 0.015 | 0.063 | 12.86 | 4.05 | 0.315 | -     | 0.02  | -     | - | 0.003 | 99.3  |
| 29 | Inclusion  | 52.22 | 0.088 | 29.16 | 0.622 | 0.002 | 0.06  | 13.50 | 3.58 | 0.225 | -     | -     | -     | - | 0.015 | 99.5  |
| 30 | Inclusion  | 50.78 | 0.013 | 30.16 | 0.696 | 0.016 | 0.064 | 14.51 | 3.13 | 0.186 | 0.008 | 0.009 | 0.001 | - | 0.011 | 99.6  |
| 31 | Inclusion  | 52.67 | -     | 28.83 | 0.639 | 0.021 | 0.052 | 12.87 | 4.04 | 0.314 | 0.047 | 0.002 | -     | - | -     | 99.5  |
| 32 | Inclusion  | 52.79 | 0.058 | 28.84 | 0.576 | -     | 0.076 | 12.73 | 4.14 | 0.303 | 0.038 | 0.018 | -     | - | -     | 99.6  |
| 33 | Inclusion  | 53.33 | 0.067 | 28.61 | 0.801 | -     | 0.174 | 12.55 | 3.93 | 0.318 | -     | 0.024 | -     | - | 0.007 | 99.8  |
| 37 | Phenocryst | 54.18 | 0.108 | 27.66 | 0.627 | -     | 0.09  | 11.74 | 4.46 | 0.353 | -     | -     | 0.028 | - | 0.006 | 99.3  |
| 38 | Phenocryst | 53.09 | 0.079 | 28.67 | 0.647 | 0.01  | 0.062 | 12.83 | 4.11 | 0.254 | 0.021 | -     | -     | - | 0.008 | 99.8  |
| 39 | Phenocryst | 53.13 | -     | 28.34 | 0.601 | -     | 0.077 | 12.56 | 4.19 | 0.295 | 0.028 | 0.011 | -     | - | -     | 99.2  |
| 40 | Phenocryst | 54.11 | 0.05  | 28.10 | 0.64  | 0.019 | 0.082 | 12.11 | 4.49 | 0.327 | 0.039 | -     | -     | - | 0.003 | 100.0 |
| 41 | Phenocryst | 53.27 | 0.025 | 28.55 | 0.665 | -     | 0.095 | 12.55 | 4.25 | 0.308 | -     | 0.018 | 0.027 | - | -     | 99.7  |
| 42 | Phenocryst | 51.21 | 0.067 | 30.27 | 0.647 | 0.039 | 0.069 | 13.63 | 3.52 | 0.233 | 0.058 | 0.002 | -     | - | -     | 99.7  |
| 43 | Phenocryst | 52.32 | -     | 29.51 | 0.589 | -     | 0.066 | 13.52 | 3.88 | 0.225 | 0.009 | -     | 0.019 | - | 0.009 | 100.1 |
| 44 | Phenocryst | 53.59 | 0.046 | 28.60 | 0.672 | -     | 0.086 | 12.57 | 4.17 | 0.328 | 0.022 | 0.026 | 0.015 | - | -     | 100.1 |
| 45 | Phenocryst | 51.73 | 0.054 | 29.41 | 0.625 | -     | 0.066 | 13.47 | 3.68 | 0.237 | 0.02  | -     | 0.031 | - | -     | 99.3  |
| 46 | Phenocryst | 54.22 | 0.108 | 27.65 | 0.639 | 0.034 | 0.076 | 11.64 | 4.59 | 0.335 | 0.03  | 0.007 | -     | - | -     | 99.3  |
| 47 | Phenocryst | 54.27 | 0.099 | 27.63 | 0.58  | 0.013 | 0.073 | 11.54 | 4.72 | 0.367 | -     | 0.044 | 0.008 | - | 0.011 | 99.3  |
| 48 | Phenocryst | 52.56 | 0.037 | 29.06 | 0.62  | -     | 0.078 | 12.91 | 3.90 | 0.285 | 0.018 | -     | 0.004 | - | 0.011 | 99.5  |
| 49 | Phenocryst | 54.04 | 0.05  | 28.02 | 0.627 | -     | 0.071 | 11.99 | 4.48 | 0.35  | 0.017 | 0.002 | 0.005 | - | -     | 99.7  |
| 50 | Phenocryst | 51.22 | 0.066 | 29.77 | 0.656 | 0.042 | 0.077 | 14.15 | 3.27 | 0.203 | 0.046 | -     | -     | - | -     | 99.5  |
| 51 | Phenocryst | 51.72 | 0.046 | 29.36 | 0.635 | -     | 0.087 | 13.62 | 3.62 | 0.243 | -     | 0.011 | 0.015 | - | 0.017 | 99.4  |

|    |            |       |       |       |       |       |       |       |      |       |       |       |       |   |       |      |
|----|------------|-------|-------|-------|-------|-------|-------|-------|------|-------|-------|-------|-------|---|-------|------|
| 52 | Phenocryst | 52.14 | 0.021 | 29.93 | 0.586 | 0.026 | 0.073 | 13.36 | 3.38 | 0.244 | 0.026 | -     | 0.005 | - | 0.008 | 99.8 |
| 53 | Phenocryst | 52.48 | 0.042 | 28.88 | 0.662 | 0.005 | 0.059 | 13.09 | 3.77 | 0.267 | 0.022 | 0.011 | 0.016 | - | 0.006 | 99.3 |
| 54 | Phenocryst | 54.00 | 0.037 | 28.44 | 0.657 | 0.028 | 0.07  | 11.81 | 4.42 | 0.347 | 0.024 | 0.04  | 0.001 | - | 0.003 | 99.9 |
| 55 | Phenocryst | 53.70 | 0.041 | 27.99 | 0.75  | -     | 0.064 | 12.12 | 4.35 | 0.34  | -     | 0.011 | 0.017 | - | -     | 99.4 |
| 56 | Phenocryst | 53.10 | 0.075 | 28.46 | 0.574 | 0.036 | 0.07  | 12.47 | 4.38 | 0.314 | 0.028 | 0.026 | 0.01  | - | 0.011 | 99.5 |
| 57 | Phenocryst | 54.33 | 0.07  | 27.65 | 0.68  | 0.024 | 0.081 | 11.58 | 4.54 | 0.372 | 0.015 | -     | -     | - | -     | 99.4 |
| 58 | Phenocryst | 51.45 | 0.058 | 29.68 | 0.605 | -     | 0.077 | 13.46 | 3.56 | 0.253 | 0.014 | -     | -     | - | 0.004 | 99.2 |
| 59 | Phenocryst | 51.71 | 0.008 | 29.09 | 0.63  | 0.024 | 0.073 | 13.53 | 3.65 | 0.26  | 0.042 | -     | -     | - | 0.002 | 99.0 |
| 60 | Phenocryst | 54.36 | 0.099 | 27.54 | 0.608 | 0.018 | 0.065 | 11.46 | 4.78 | 0.36  | 0.021 | 0.02  | -     | - | -     | 99.3 |
| 61 | Phenocryst | 54.25 | 0.141 | 27.74 | 0.685 | -     | 0.069 | 11.45 | 4.61 | 0.411 | 0.032 | 0.02  | -     | - | 0.007 | 99.4 |
| 62 | Phenocryst | 54.19 | 0.12  | 27.91 | 0.589 | 0.011 | 0.068 | 11.83 | 4.62 | 0.33  | 0.051 | -     | 0.021 | - | 0.01  | 99.7 |
| 63 | Phenocryst | 53.20 | 0.083 | 28.85 | 0.607 | -     | 0.087 | 12.37 | 4.32 | 0.317 | 0.004 | -     | -     | - | -     | 99.8 |
| 64 | Phenocryst | 53.41 | 0.066 | 28.30 | 0.63  | 0.026 | 0.062 | 12.20 | 4.28 | 0.318 | 0.004 | 0.029 | 0.008 | - | 0.006 | 99.3 |
| 65 | Phenocryst | 54.53 | 0.07  | 27.54 | 0.627 | -     | 0.057 | 11.56 | 4.80 | 0.393 | 0.048 | -     | 0.027 | - | 0.003 | 99.6 |
| 66 | Phenocryst | 54.19 | 0.029 | 28.21 | 0.614 | -     | 0.064 | 11.68 | 4.56 | 0.354 | 0.018 | -     | 0.014 | - | 0.003 | 99.7 |
| 67 | Phenocryst | 53.49 | 0.021 | 28.20 | 0.704 | -     | 0.092 | 12.48 | 4.51 | 0.393 | -     | -     | 0.016 | - | 0.016 | 99.9 |
| 86 | Inclusion  | 52.89 | 0.062 | 28.39 | 0.573 | 0.031 | 0.103 | 12.87 | 4.15 | 0.305 | 0.023 | -     | -     | - | 0.011 | 99.4 |
| 87 | Inclusion  | 52.37 | 0.09  | 29.08 | 0.725 | -     | 0.08  | 13.19 | 3.97 | 0.273 | -     | 0.011 | 0.043 | - | 0.006 | 99.8 |
| 88 | Phenocryst | 52.70 | 0.053 | 28.69 | 0.679 | 0.014 | 0.085 | 12.92 | 3.89 | 0.36  | 0.023 | 0.039 | 0.005 | - | -     | 99.5 |
| 89 | Phenocryst | 52.08 | 0.062 | 29.27 | 0.689 | 0.008 | 0.073 | 13.29 | 3.64 | 0.297 | -     | 0.002 | 0.019 | - | 0.005 | 99.4 |
| 90 | Phenocryst | 51.67 | -     | 29.54 | 0.77  | -     | 0.075 | 13.86 | 3.25 | 0.278 | 0.026 | -     | -     | - | 0.003 | 99.5 |

Table S4. (continued)

| Spot      | Type       | Or   | Ab    | An    | $^{87}\text{Sr}/^{86}\text{Sr}$ | $\pm 1\sigma$ | P   | T    |
|-----------|------------|------|-------|-------|---------------------------------|---------------|-----|------|
| 16BG11-2@ |            |      |       |       |                                 |               |     |      |
| 21        | Inclusion  | 1.25 | 30.05 | 68.69 | 0.70603                         | 0.00010       | 8.5 | 1265 |
| 22        | Inclusion  | 1.10 | 27.19 | 71.71 | 0.70599                         | 0.00005       | 8.0 | 1268 |
| 23        | Inclusion  | 1.68 | 36.15 | 62.17 | 0.70605                         | 0.00005       |     |      |
| 24        | Inclusion  | 1.18 | 27.53 | 71.29 | 0.70601                         | 0.00006       | 7.5 | 1244 |
| 25        | Inclusion  | 2.30 | 40.09 | 57.61 | 0.70599                         | 0.00006       |     |      |
| 26        | Inclusion  | 1.85 | 37.34 | 60.80 | 0.70580                         | 0.00006       |     |      |
| 27        | Inclusion  | 2.26 | 39.26 | 58.49 | 0.70588                         | 0.00006       |     |      |
| 28        | Inclusion  | 1.33 | 31.26 | 67.41 | 0.70593                         | 0.00005       | 7.7 | 1225 |
| 29        | Inclusion  | 1.58 | 34.06 | 64.36 | 0.70595                         | 0.00005       | 7.2 | 1186 |
| 30        | Inclusion  | 1.59 | 35.70 | 62.71 | 0.70606                         | 0.00005       |     |      |
| 31        | Inclusion  | 1.36 | 31.23 | 67.41 | 0.70600                         | 0.00006       | 6.7 | 1189 |
| 32        | Inclusion  | 1.25 | 27.89 | 70.85 | 0.70599                         | 0.00005       | 6.2 | 1192 |
| 41        | Phenocryst | 2.20 | 42.39 | 55.41 | 0.70600                         | 0.00006       |     |      |
| 42        | Phenocryst | 2.19 | 42.16 | 55.65 | 0.70603                         | 0.00006       |     |      |
| 43        | Phenocryst | 2.52 | 44.44 | 53.04 | 0.70621                         | 0.00006       |     |      |
| 44        | Phenocryst | 2.37 | 43.38 | 54.25 | 0.70583                         | 0.00006       |     |      |
| 45        | Phenocryst | 2.33 | 40.37 | 57.30 | 0.70587                         | 0.00005       |     |      |
| 46        | Phenocryst | 2.48 | 42.00 | 55.52 | 0.70598                         | 0.00006       |     |      |
| 77        | Phenocryst | 2.32 | 41.82 | 55.85 | 0.70596                         | 0.00006       |     |      |
| 78        | Phenocryst | 1.51 | 33.98 | 64.51 | 0.70589                         | 0.00006       | 7.1 | 1201 |
| 79        | Phenocryst | 1.63 | 35.06 | 63.31 | 0.70591                         | 0.00005       | 6.3 | 1165 |
| 80        | Phenocryst | 1.89 | 34.32 | 63.79 | 0.70594                         | 0.00006       | 6.3 | 1166 |

|           |            |      |       |       |         |         |     |      |
|-----------|------------|------|-------|-------|---------|---------|-----|------|
| 81        | Phenocryst | 1.96 | 37.63 | 60.40 | 0.70592 | 0.00005 | 6.9 | 1162 |
| 82        | Phenocryst | 1.69 | 35.40 | 62.91 | 0.70593 | 0.00006 | 6.4 | 1164 |
| <hr/>     |            |      |       |       |         |         |     |      |
| 16BG11-4@ |            |      |       |       |         |         |     |      |
| 11        | Phenocryst | 2.31 | 42.63 | 55.06 | 0.70589 | 0.00006 |     |      |
| 12        | Phenocryst | 2.03 | 36.63 | 61.34 | 0.70586 | 0.00006 | 7.0 | 1190 |
| 13        | Phenocryst | 2.32 | 42.51 | 55.16 | 0.70581 | 0.00007 |     |      |
| 14        | Phenocryst | 1.77 | 38.32 | 59.92 | 0.70601 | 0.00006 | 7.2 | 1188 |
| 15        | Phenocryst | 1.44 | 30.84 | 67.72 | 0.70588 | 0.00008 | 5.9 | 1196 |
| 16        | Phenocryst | 1.98 | 39.74 | 58.28 | 0.70584 | 0.00006 | 7.5 | 1186 |
| 17        | Phenocryst | 1.00 | 26.92 | 72.08 | 0.70579 | 0.00007 | 5.0 | 1189 |
| 18        | Phenocryst | 2.31 | 42.80 | 54.89 | 0.70584 | 0.00006 |     |      |
| 32        | Phenocryst | 2.00 | 38.83 | 59.17 | 0.70580 | 0.00005 | 7.1 | 1177 |
| 33        | Phenocryst | 1.72 | 34.66 | 63.61 | 0.70595 | 0.00007 | 6.3 | 1182 |
| 34        | Phenocryst | 1.69 | 37.72 | 60.59 | 0.70590 | 0.00006 | 6.8 | 1178 |
| 35        | Phenocryst | 1.27 | 32.21 | 66.52 | 0.70589 | 0.00006 | 5.7 | 1180 |
| 36        | Phenocryst | 1.56 | 34.21 | 64.23 | 0.70595 | 0.00005 | 6.0 | 1175 |
| 37        | Phenocryst | 2.18 | 41.12 | 56.70 | 0.70593 | 0.00006 |     |      |
| <hr/>     |            |      |       |       |         |         |     |      |
| 17BG02-2@ |            |      |       |       |         |         |     |      |
| 4         | Phenocryst | 1.98 | 38.96 | 59.05 |         |         |     |      |
| 5         | Phenocryst | 2.21 | 42.86 | 54.93 |         |         |     |      |
| 6         | Phenocryst | 2.49 | 41.49 | 56.02 |         |         |     |      |
| 7         | Phenocryst | 2.26 | 40.08 | 57.66 |         |         |     |      |
| 8         | Phenocryst | 2.20 | 38.81 | 58.99 |         |         |     |      |
| 9         | Phenocryst | 2.38 | 38.61 | 59.01 |         |         |     |      |
| 10        | Phenocryst | 2.13 | 37.65 | 60.22 |         |         |     |      |
| 11        | Phenocryst | 2.76 | 41.60 | 55.63 |         |         |     |      |

|    |            |      |       |       |
|----|------------|------|-------|-------|
| 12 | Phenocryst | 2.57 | 40.54 | 56.89 |
| 13 | Phenocryst | 1.87 | 37.39 | 60.74 |
| 14 | Phenocryst | 1.66 | 35.17 | 63.17 |
| 15 | Phenocryst | 3.05 | 45.79 | 51.16 |
| 16 | Phenocryst | 2.29 | 40.01 | 57.70 |
| 17 | Phenocryst | 2.00 | 36.31 | 61.69 |
| 18 | Phenocryst | 3.01 | 40.92 | 56.07 |
| 19 | Phenocryst | 2.22 | 38.84 | 58.93 |
| 20 | Phenocryst | 2.40 | 39.63 | 57.97 |
| 21 | Phenocryst | 3.09 | 46.12 | 50.79 |
| 22 | Phenocryst | 2.78 | 46.16 | 51.07 |
| 23 | Phenocryst | 2.12 | 39.37 | 58.51 |
| 24 | Phenocryst | 1.54 | 33.42 | 65.03 |
| 25 | Phenocryst | 2.88 | 45.70 | 51.42 |
| 26 | Phenocryst | 2.44 | 42.23 | 55.33 |
| 27 | Phenocryst | 1.83 | 37.22 | 60.94 |
| 28 | Phenocryst | 2.25 | 41.51 | 56.24 |
| 29 | Phenocryst | 2.86 | 44.26 | 52.87 |
| 30 | Phenocryst | 2.95 | 43.02 | 54.03 |
| 31 | Phenocryst | 2.54 | 39.27 | 58.19 |
| 32 | Phenocryst | 2.27 | 38.95 | 58.78 |
| 33 | Phenocryst | 2.66 | 45.13 | 52.21 |

---

17BG03-1@

|    |            |      |       |       |         |         |     |      |
|----|------------|------|-------|-------|---------|---------|-----|------|
| 16 | Phenocryst | 2.13 | 41.07 | 56.80 | 0.70584 | 0.00006 |     |      |
| 17 | Phenocryst | 2.68 | 31.84 | 65.48 | 0.70584 | 0.00005 | 6.2 | 1169 |
| 18 | Phenocryst | 2.20 | 37.97 | 59.84 | 0.70609 | 0.00005 |     |      |

|    |            |      |       |       |         |         |     |      |
|----|------------|------|-------|-------|---------|---------|-----|------|
| 19 | Phenocryst | 1.05 | 25.95 | 73.00 | 0.70594 | 0.00006 | 5.0 | 1173 |
| 20 | Phenocryst | 2.23 | 40.92 | 56.85 | 0.70608 | 0.00006 |     |      |
| 21 | Phenocryst | 1.75 | 37.34 | 60.91 | 0.70614 | 0.00005 | 6.8 | 1162 |
| 22 | Phenocryst | 1.03 | 27.08 | 71.89 | 0.70609 | 0.00006 | 5.2 | 1172 |
| 23 | Phenocryst | 0.99 | 27.90 | 71.10 | 0.70598 | 0.00005 | 5.2 | 1171 |
| 24 | Phenocryst | 2.07 | 39.13 | 58.80 | 0.70595 | 0.00005 |     |      |
| 25 | Phenocryst | 2.21 | 41.73 | 56.06 | 0.70619 | 0.00006 |     |      |
| 41 | Phenocryst | 1.43 | 31.78 | 66.79 | 0.70593 | 0.00004 | 5.9 | 1168 |
| 42 | Phenocryst | 2.24 | 42.35 | 55.41 | 0.70603 | 0.00006 |     |      |
| 43 | Phenocryst | 1.48 | 35.60 | 62.92 | 0.70620 | 0.00005 | 6.4 | 1163 |
| 44 | Phenocryst | 1.05 | 25.55 | 73.40 | 0.70606 | 0.00005 | 5.0 | 1173 |
| 45 | Phenocryst | 2.18 | 41.29 | 56.53 | 0.70609 | 0.00006 |     |      |
| 46 | Phenocryst | 1.38 | 30.59 | 68.03 | 0.70604 | 0.00006 | 5.7 | 1169 |
| 47 | Phenocryst | 2.10 | 43.67 | 54.23 | 0.70611 | 0.00005 |     |      |
| 48 | Phenocryst | 1.69 | 33.62 | 64.69 | 0.70605 | 0.00006 | 6.2 | 1166 |
| 49 | Phenocryst | 2.88 | 37.15 | 59.97 | 0.70603 | 0.00006 | 7.1 | 1163 |
| 50 | Phenocryst | 1.25 | 31.13 | 67.62 | 0.70583 | 0.00006 | 5.7 | 1168 |
| 54 | Phenocryst | 1.92 | 37.89 | 60.19 | 0.70604 | 0.00006 |     |      |
| 55 | Phenocryst | 1.93 | 38.07 | 60.00 | 0.70600 | 0.00006 |     |      |
| 56 | Phenocryst | 2.15 | 41.38 | 56.46 | 0.70636 | 0.00006 |     |      |
| 57 | Phenocryst | 1.88 | 35.87 | 62.24 | 0.70595 | 0.00006 | 6.6 | 1164 |
| 58 | Phenocryst | 1.80 | 37.65 | 60.55 | 0.70615 | 0.00006 |     |      |
| 59 | Phenocryst | 1.84 | 37.98 | 60.17 | 0.70627 | 0.00006 |     |      |
| 60 | Phenocryst | 1.80 | 35.87 | 62.33 | 0.70593 | 0.00006 | 6.6 | 1163 |
| 61 | Phenocryst | 1.66 | 36.16 | 62.18 | 0.70586 | 0.00006 | 6.6 | 1163 |
| 62 | Phenocryst | 1.74 | 36.50 | 61.76 | 0.70621 | 0.00005 | 6.7 | 1163 |

|           |            |      |       |       |         |         |     |      |
|-----------|------------|------|-------|-------|---------|---------|-----|------|
| 63        | Phenocryst | 1.69 | 36.06 | 62.26 | 0.70623 | 0.00006 | 6.6 | 1163 |
| 64        | Phenocryst | 2.62 | 35.95 | 61.43 | 0.70634 | 0.00006 | 6.8 | 1164 |
| 65        | Phenocryst | 1.99 | 39.73 | 58.28 | 0.70634 | 0.00005 |     |      |
| 66        | Phenocryst | 1.78 | 39.65 | 58.57 | 0.70637 | 0.00005 |     |      |
| 67        | Phenocryst | 2.10 | 39.23 | 58.67 | 0.70627 | 0.00005 |     |      |
| 68        | Phenocryst | 1.89 | 40.47 | 57.64 | 0.70594 | 0.00006 |     |      |
| 85        | Inclusion  | 1.47 | 40.60 | 57.93 | 0.70618 | 0.00009 |     |      |
| 86        | Inclusion  | 1.90 | 40.74 | 57.36 | 0.70623 | 0.00008 |     |      |
| 105       | Inclusion  | 1.69 | 38.83 | 59.48 |         |         |     |      |
| <hr/>     |            |      |       |       |         |         |     |      |
| 17BG03-2@ |            |      |       |       |         |         |     |      |
| 23        | Phenocryst | 1.45 | 33.90 | 64.66 |         |         | 6.2 | 1176 |
| 24        | Phenocryst | 1.80 | 34.84 | 63.36 |         |         | 6.5 | 1175 |
| 25        | Phenocryst | 1.66 | 36.18 | 62.16 |         |         | 6.7 | 1173 |
| 26        | Phenocryst | 1.96 | 37.71 | 60.33 |         |         |     |      |
| 49        | Phenocryst | 2.03 | 39.30 | 58.67 |         |         |     |      |
| 50        | Phenocryst | 1.89 | 40.03 | 58.08 |         |         |     |      |
| 51        | Phenocryst | 1.60 | 37.62 | 60.78 |         |         |     |      |
| 52        | Phenocryst | 1.93 | 39.15 | 58.92 |         |         |     |      |
| 53        | Phenocryst | 1.89 | 40.81 | 57.30 |         |         |     |      |
| 54        | Phenocryst | 1.77 | 38.16 | 60.08 |         |         |     |      |
| <hr/>     |            |      |       |       |         |         |     |      |
| 17BG03-3@ |            |      |       |       |         |         |     |      |
| 24        | Inclusion  | 1.87 | 37.77 | 60.36 | 0.70572 | 0.00006 |     |      |
| 25        | Inclusion  | 1.59 | 35.05 | 63.36 | 0.70594 | 0.00007 | 7.3 | 1205 |
| 26        | Inclusion  | 1.53 | 35.94 | 62.52 | 0.70600 | 0.00006 | 7.1 | 1193 |
| 27        | Inclusion  | 1.74 | 38.60 | 59.66 | 0.70602 | 0.00007 |     |      |
| 28        | Inclusion  | 1.82 | 35.62 | 62.56 | 0.70607 | 0.00007 | 7.2 | 1194 |

|    |            |      |       |       |         |         |     |      |
|----|------------|------|-------|-------|---------|---------|-----|------|
| 29 | Inclusion  | 1.32 | 32.00 | 66.67 | 0.70592 | 0.00007 | 6.5 | 1198 |
| 30 | Inclusion  | 1.09 | 27.79 | 71.12 | 0.70593 | 0.00006 | 5.8 | 1202 |
| 31 | Inclusion  | 1.82 | 35.58 | 62.60 | 0.70597 | 0.00005 | 7.1 | 1190 |
| 32 | Inclusion  | 1.75 | 36.43 | 61.82 | 0.70592 | 0.00005 |     |      |
| 33 | Inclusion  | 1.89 | 35.48 | 62.63 | 0.70603 | 0.00006 | 6.9 | 1183 |
| 37 | Phenocryst | 2.08 | 39.86 | 58.06 | 0.70591 | 0.00005 |     |      |
| 38 | Phenocryst | 1.47 | 36.14 | 62.39 |         |         | 6.6 | 1173 |
| 39 | Phenocryst | 1.71 | 36.99 | 61.30 | 0.70593 | 0.00006 |     |      |
| 40 | Phenocryst | 1.89 | 39.38 | 58.74 | 0.70595 | 0.00006 |     |      |
| 41 | Phenocryst | 1.78 | 37.32 | 60.90 |         |         |     |      |
| 42 | Phenocryst | 1.37 | 31.39 | 67.24 | 0.70591 | 0.00006 | 5.9 | 1178 |
| 43 | Phenocryst | 1.29 | 33.76 | 64.95 |         |         | 6.2 | 1176 |
| 44 | Phenocryst | 1.90 | 36.79 | 61.31 | 0.70590 | 0.00006 |     |      |
| 45 | Phenocryst | 1.38 | 32.61 | 66.00 |         |         | 6.0 | 1177 |
| 46 | Phenocryst | 1.96 | 40.80 | 57.23 | 0.70590 | 0.00006 |     |      |
| 47 | Phenocryst | 2.13 | 41.62 | 56.25 | 0.70616 | 0.00006 |     |      |
| 48 | Phenocryst | 1.67 | 34.77 | 63.56 | 0.70587 | 0.00006 | 6.5 | 1175 |
| 49 | Phenocryst | 2.03 | 39.53 | 58.44 | 0.70603 | 0.00006 |     |      |
| 50 | Phenocryst | 1.19 | 29.12 | 69.69 | 0.70587 | 0.00006 | 5.5 | 1180 |
| 51 | Phenocryst | 1.41 | 32.00 | 66.59 | 0.70620 | 0.00007 | 6.0 | 1178 |
| 52 | Phenocryst | 1.47 | 30.95 | 67.58 | 0.70596 | 0.00006 | 5.8 | 1179 |
| 53 | Phenocryst | 1.57 | 33.72 | 64.71 | 0.70606 | 0.00006 | 6.3 | 1176 |
| 54 | Phenocryst | 2.04 | 39.54 | 58.42 | 0.70587 | 0.00006 |     |      |
| 55 | Phenocryst | 1.98 | 38.59 | 59.42 |         |         |     |      |
| 56 | Phenocryst | 1.80 | 38.15 | 60.05 | 0.70615 | 0.00006 |     |      |
| 57 | Phenocryst | 2.19 | 40.62 | 57.20 |         |         |     |      |



|    |            |      |       |       |         |         |     |      |
|----|------------|------|-------|-------|---------|---------|-----|------|
| 58 | Phenocryst | 1.49 | 31.87 | 66.64 | 0.70617 | 0.00006 | 6.0 | 1178 |
| 59 | Phenocryst | 1.51 | 32.31 | 66.18 |         |         | 6.0 | 1177 |
| 60 | Phenocryst | 2.09 | 42.10 | 55.81 | 0.70618 | 0.00005 |     |      |
| 61 | Phenocryst | 2.41 | 41.12 | 56.47 |         |         |     |      |
| 62 | Phenocryst | 1.91 | 40.62 | 57.47 |         |         |     |      |
| 63 | Phenocryst | 1.84 | 37.98 | 60.18 | 0.70605 | 0.00006 |     |      |
| 64 | Phenocryst | 1.86 | 38.12 | 60.02 |         |         |     |      |
| 65 | Phenocryst | 2.26 | 41.90 | 55.84 | 0.70587 | 0.00006 |     |      |
| 66 | Phenocryst | 2.07 | 40.56 | 57.37 | 0.70596 | 0.00006 |     |      |
| 67 | Phenocryst | 2.22 | 38.69 | 59.10 | 0.70593 | 0.00006 |     |      |
| 86 | Inclusion  | 1.75 | 36.20 | 62.05 | 0.70588 | 0.00006 | 7.0 | 1185 |
| 87 | Inclusion  | 1.57 | 34.72 | 63.71 | 0.70604 | 0.00005 | 6.4 | 1175 |
| 88 | Phenocryst | 2.10 | 34.52 | 63.38 |         |         | 6.5 | 1175 |
| 89 | Phenocryst | 1.75 | 32.56 | 65.70 |         |         | 6.1 | 1177 |
| 90 | Phenocryst | 1.65 | 29.31 | 69.04 |         |         | 5.6 | 1181 |

---

3.5. Table S5: Representative titanomagnetite major element compositions (wt%) from the Nakoulai mafic dikes.

| Spot      | SiO <sub>2</sub> | TiO <sub>2</sub> | Al <sub>2</sub> O <sub>3</sub> | FeO    | MnO   | MgO   | CaO   | Na <sub>2</sub> O | K <sub>2</sub> O | P <sub>2</sub> O <sub>5</sub> | Cr <sub>2</sub> O <sub>3</sub> | NiO   | Cl    | F     | Total  |
|-----------|------------------|------------------|--------------------------------|--------|-------|-------|-------|-------------------|------------------|-------------------------------|--------------------------------|-------|-------|-------|--------|
| 16BG11-2@ |                  |                  |                                |        |       |       |       |                   |                  |                               |                                |       |       |       |        |
| 33        | 0.196            | 8.276            | 5.811                          | 78.407 | 0.398 | 1.243 | -     | 0.015             | -                | 0.009                         | 2.159                          | 0.033 | -     | 0.1   | 96.605 |
| 34        | 0.058            | 8.062            | 5.881                          | 76.529 | 0.314 | 2.717 | -     | 0.062             | -                | -                             | 1.07                           | 0.019 | 0.009 | 0.169 | 94.817 |
| 35        | 0.052            | 17.285           | 1.116                          | 77.245 | 1.029 | 0.004 | -     | 0.013             | -                | 0.025                         | 0.367                          | 0.03  | -     | 0.194 | 97.278 |
| 36        | 0.224            | 11.362           | 1.031                          | 83.191 | 0.086 | 0.024 | 0.034 | -                 | 0.009            | 0.009                         | 0.065                          | 0.033 | -     | 0.2   | 96.184 |
| 37        | 0.106            | 10.187           | 0.992                          | 83.884 | 0.369 | 0.17  | 0.021 | -                 | 0.021            | -                             | 0.046                          | 0.011 | -     | 0.243 | 95.948 |
| 38        | 0.175            | 10.551           | 1.144                          | 83.849 | 0.214 | 0.052 | -     | -                 | -                | -                             | 0.05                           | -     | 0.005 | 0.146 | 96.124 |
| 39        | 0.582            | 13.602           | 1.44                           | 79.53  | 0.113 | 0.032 | 0.074 | -                 | -                | 0.011                         | 0.204                          | 0.001 | -     | 0.254 | 95.736 |
| 40        | 4.792            | 16.823           | 1.214                          | 72.031 | 0.106 | 0.058 | 0.262 | 0.215             | 0.135            | -                             | 0.335                          | -     | -     | 0.045 | 95.997 |
| 74        | 6.532            | 6.082            | 1.287                          | 79.557 | 0.092 | 0.671 | 0.12  | 0.157             | 0.253            | 0.022                         | 0.484                          | -     | -     | 0.137 | 95.336 |
| 75        | 4.946            | 15.877           | 2.499                          | 70.141 | 0.073 | 0.057 | 0.318 | 0.292             | 0.178            | -                             | 0.438                          | -     | 0.002 | 0.122 | 94.892 |
| 76        | 3.35             | 17.298           | 1.392                          | 72.892 | 0.117 | 0.028 | 0.219 | 0.214             | 0.104            | 0.023                         | 0.351                          | -     | -     | 0.129 | 96.063 |
| 83        | 2.436            | 3.395            | 0.491                          | 89.362 | 0.047 | 0.087 | 0.124 | 0.078             | 0.044            | -                             | 0.949                          | 0.018 | -     | 0.232 | 97.165 |
| 16BG11-4@ |                  |                  |                                |        |       |       |       |                   |                  |                               |                                |       |       |       |        |
| 19        | 0.054            | 8.505            | 5.52                           | 78.85  | 0.305 | 3.692 | 0.106 | 0.009             | -                | 0.001                         | 0.554                          | 0.013 | -     | 0.214 | 97.733 |
| 20        | 0.368            | 14.866           | 2.557                          | 77.279 | 0.137 | 0.044 | 0.024 | 0.041             | 0.03             | 0.008                         | 0.509                          | 0.033 | -     | 0.159 | 95.988 |
| 21        | 1.494            | 16.205           | 2.741                          | 75.249 | 0.209 | 0.034 | 0.084 | 0.061             | 0.06             | 0.017                         | 0.557                          | 0.025 | -     | 0.21  | 96.858 |
| 39        | 0.17             | 12.178           | 1.062                          | 83.865 | 0.101 | 0.021 | 0.049 | -                 | -                | 0.008                         | 0.073                          | 0.008 | -     | 0.232 | 97.669 |
| 40        | 0.15             | 11.265           | 1.234                          | 82.94  | 0.033 | -     | 0.111 | 0.08              | 0.015            | 0.005                         | 0.051                          | -     | -     | 0.309 | 96.063 |
| 17BG02-2@ |                  |                  |                                |        |       |       |       |                   |                  |                               |                                |       |       |       |        |
| 1         | 0.068            | 14.556           | 1.194                          | 79.034 | 0.507 | 0.715 | -     | -                 | -                | -                             | 0.112                          | 0.013 | 0.096 | -     | 96.255 |
| 2         | 0.215            | 15.487           | 0.885                          | 75.319 | 0.324 | 0.612 | -     | 0.005             | 0.01             | 0.008                         | 0.044                          | 0.005 | 0.134 | -     | 92.992 |
| 3         | 0.112            | 16.828           | 0.323                          | 75.224 | 0.333 | 0.725 | 0.032 | 0.038             | 0.025            | 0.045                         | 0.032                          | -     | 0.117 | 0.009 | 93.792 |

## 17BG03-1@

|     |        |        |       |        |       |       |       |       |       |       |       |       |       |       |        |
|-----|--------|--------|-------|--------|-------|-------|-------|-------|-------|-------|-------|-------|-------|-------|--------|
| 69  | 0.091  | 8.216  | 8.159 | 74.411 | 0.389 | 3.535 | 0.119 | -     | -     | 0.023 | 0.872 | 0.058 | 0.066 | -     | 95.911 |
| 83  | 2.97   | 11.943 | 2.441 | 77.863 | 0.696 | 0.175 | -     | 0.031 | -     | 0.002 | 0.517 | 0.004 | 0.118 | -     | 96.71  |
| 84  | 11.256 | 11.968 | 2.293 | 70.028 | 0.668 | 0.104 | -     | 0.059 | 0.003 | -     | 0.483 | 0.029 | 0.13  | -     | 96.966 |
| 87  | 0.121  | 11.597 | 4.146 | 80.33  | 0.515 | 0.329 | -     | -     | -     | -     | 0.452 | -     | 0.12  | 0.019 | 97.574 |
| 88  | 0.087  | 10.497 | 4.804 | 79.569 | 0.477 | 0.468 | 0.083 | 0.085 | 0.007 | -     | 0.787 | 0.021 | 0.066 | -     | 96.923 |
| 104 | 1.083  | 8.334  | 7.063 | 75.76  | 0.451 | 2.332 | -     | 0.01  | -     | -     | 0.91  | 0.003 | 0.043 | 0.007 | 95.976 |

## 17BG03-2@

|    |       |        |       |        |       |       |       |       |       |       |       |       |       |       |        |
|----|-------|--------|-------|--------|-------|-------|-------|-------|-------|-------|-------|-------|-------|-------|--------|
| 11 | 0.148 | 12.31  | 4.551 | 74.137 | 0.438 | 2.193 | 0.247 | 0.002 | -     | -     | 0.405 | 0.002 | 0.118 | -     | 94.501 |
| 12 | 0.106 | 8.896  | 5.681 | 76.726 | 0.31  | 4.095 | 0.139 | -     | -     | 0.016 | 0.795 | 0.027 | 0.097 | 0.001 | 96.848 |
| 13 | 0.135 | 14.156 | 3.122 | 77.193 | 0.663 | 0.292 | -     | 0.027 | -     | 0.031 | 0.647 | 0.004 | 0.166 | -     | 96.366 |
| 20 | 0.109 | 8.331  | 6.2   | 74.123 | 0.295 | 4.344 | -     | -     | -     | -     | 1.492 | 0.017 | 0.11  | -     | 94.975 |
| 21 | 0.066 | 8.579  | 6.566 | 75.785 | 0.326 | 4.031 | 0.01  | 0.061 | 0.006 | 0.022 | 1.426 | 0.048 | 0.052 | -     | 96.956 |
| 22 | 0.113 | 8.229  | 5.074 | 76.56  | 0.288 | 4.525 | 0.074 | 0.088 | 0.001 | 0.016 | 0.935 | 0.003 | 0.16  | -     | 95.999 |
| 38 | 0.153 | 10.501 | 4.438 | 75.555 | 0.351 | 3.555 | -     | 0.05  | -     | 0.001 | 0.877 | 0.007 | 0.202 | 0.007 | 95.61  |

## 17BG03-3@

|    |       |       |       |        |       |       |       |       |       |       |       |       |       |       |        |
|----|-------|-------|-------|--------|-------|-------|-------|-------|-------|-------|-------|-------|-------|-------|--------|
| 21 | 0.157 | 9.758 | 4.908 | 79.198 | 0.61  | 1.334 | -     | 0.051 | -     | -     | 0.762 | 0.03  | 0.205 | -     | 96.927 |
| 22 | 0.093 | 9.363 | 6.265 | 76.208 | 0.32  | 2.745 | -     | -     | -     | 0.014 | 0.574 | 0.044 | 0.155 | 0.004 | 95.719 |
| 23 | 0.098 | 8.68  | 5.865 | 76.445 | 0.256 | 3.974 | -     | 0.026 | 0.001 | -     | 1.071 | 0.011 | 0.126 | -     | 96.5   |
| 83 | 0.094 | 9.617 | 4.774 | 76.184 | 0.313 | 4.032 | 0.167 | 0.025 | -     | 0.017 | 0.732 | 0.045 | 0.085 | -     | 96.049 |
| 84 | 0.086 | 8.641 | 6.739 | 73.203 | 0.325 | 4.329 | 0.073 | -     | -     | 0.006 | 1.926 | 0.037 | 0.109 | -     | 95.428 |
| 85 | 0.086 | 8.385 | 6.849 | 74.455 | 0.334 | 4.212 | 0.046 | -     | -     | -     | 1.871 | 0.059 | 0.165 | -     | 96.393 |

3.6. Table S6: Representative clinopyroxene trace element compositions (ppm) from the Nakoulai mafic dikes.

| Spot      | Li   | Sc   | V   | Cr   | Co   | Ni   | Cu   | Zn   | Ga   | Sr   | Y    | Zr   | Nb    | La    | Ce   |
|-----------|------|------|-----|------|------|------|------|------|------|------|------|------|-------|-------|------|
| 16BG11-2@ |      |      |     |      |      |      |      |      |      |      |      |      |       |       |      |
| 6         | 23.5 | 115  | 325 | 323  | 47.9 | 47.7 | 9.63 | 57.3 | 6.76 | 27.7 | 22.9 | 20.9 | 0.046 | 1.92  | 8.33 |
| 7         | 16.4 | 117  | 294 | 95   | 76.7 | 73.1 | 2.50 | 97.2 | 5.68 | 23.0 | 26.0 | 20.3 | 0.069 | 2.12  | 9.05 |
| 8         | 12.5 | 110  | 331 | 343  | 48.8 | 52.3 | 2.95 | 58.2 | 7.22 | 28.3 | 23.7 | 22.7 | 0.055 | 2.07  | 8.89 |
| 9         | 12.3 | 108  | 299 | 220  | 48.5 | 47.3 | 3.06 | 59.8 | 5.82 | 25.6 | 20.8 | 17.1 | 0.022 | 1.68  | 7.29 |
| 10        | 5.87 | 132  | 328 | 504  | 44.7 | 46.1 | 3.34 | 51.3 | 7.39 | 32.1 | 21.3 | 23.3 | 0.030 | 2.03  | 8.74 |
| 11        | 5.39 | 130  | 414 | 313  | 45.0 | 45.3 | 2.99 | 53.0 | 9.39 | 31.8 | 28.3 | 31.6 | 0.045 | 2.83  | 11.4 |
| 12        | 6.59 | 131  | 402 | 369  | 45.3 | 44.7 | 7.10 | 54.4 | 8.91 | 33.1 | 27.3 | 30.1 | 0.049 | 2.89  | 11.8 |
| 13        | 5.14 | 131  | 344 | 325  | 43.8 | 37.7 | 3.08 | 56.2 | 8.14 | 30.0 | 24.6 | 25.4 | 0.030 | 2.45  | 10.1 |
| 14        | 4.63 | 137  | 359 | 180  | 45.7 | 36.8 | 3.13 | 62.5 | 8.57 | 31.2 | 29.4 | 28.7 | 0.039 | 2.79  | 11.5 |
| 15        | 5.70 | 118  | 301 | 484  | 46.6 | 38.3 | 2.67 | 60.1 | 6.17 | 26.9 | 21.0 | 19.8 | 0.034 | 1.82  | 7.80 |
| 16        | 7.85 | 118  | 316 | 299  | 46.6 | 45.5 | 3.21 | 57.6 | 6.80 | 26.8 | 22.2 | 19.6 | 0.019 | 1.91  | 7.83 |
| 17        | 10.6 | 115  | 325 | 250  | 49.4 | 50.7 | 3.32 | 61.4 | 6.84 | 35.0 | 24.3 | 21.6 | 0.034 | 2.35  | 9.14 |
| 18        | 19.7 | 117  | 329 | 297  | 48.5 | 47.1 | 2.29 | 60.1 | 7.11 | 26.5 | 25.4 | 22.2 | 0.060 | 2.28  | 9.08 |
| 19        | 26.3 | 128  | 324 | 258  | 47.5 | 39.2 | 3.55 | 63.9 | 6.53 | 26.5 | 24.4 | 22.4 | 0.027 | 2.24  | 9.08 |
| 20        | 34.3 | 105  | 432 | 259  | 50.5 | 55.1 | 7.06 | 64.2 | 9.73 | 31.7 | 28.5 | 30.8 | 0.029 | 2.59  | 11.7 |
| 17BG03-1@ |      |      |     |      |      |      |      |      |      |      |      |      |       |       |      |
| 1         | 7.42 | 113  | 344 | 944  | 45.2 | 69.0 | 3.33 | 47.6 | 5.83 | 31.2 | 20.2 | 19.1 | 0.041 | 1.89  | 7.57 |
| 2         | 6.70 | 99.2 | 357 | 1569 | 41.4 | 78.1 | 3.32 | 40.9 | 8.31 | 63.7 | 17.8 | 28.1 | 0.659 | 3.44  | 10.3 |
| 3         | 3.99 | 141  | 446 | 184  | 49.0 | 57.3 | 2.84 | 56.4 | 9.07 | 34.3 | 29.8 | 33.8 | 0.066 | 3.12  | 12.7 |
| 4         | 4.60 | 85.3 | 252 | 2284 | 37.0 | 85.6 | 2.13 | 31.0 | 5.03 | 30.9 | 9.69 | 7.98 | 0.029 | 0.850 | 3.67 |
| 5         | 5.30 | 94.7 | 395 | 1072 | 49.1 | 75.6 | 3.10 | 53.5 | 8.43 | 33.7 | 22.5 | 25.0 | 0.058 | 2.25  | 9.53 |
| 6         | 6.59 | 112  | 408 | 243  | 52.5 | 73.3 | 3.35 | 60.9 | 8.84 | 32.0 | 26.2 | 28.8 | 0.051 | 2.53  | 10.6 |
| 7         | 2.98 | 83.4 | 229 | 1517 | 39.8 | 89.3 | 2.16 | 27.6 | 4.18 | 25.8 | 9.55 | 6.33 | 0.012 | 0.68  | 2.97 |

|    |      |      |     |      |      |      |      |      |      |      |      |      |       |       |      |
|----|------|------|-----|------|------|------|------|------|------|------|------|------|-------|-------|------|
| 8  | 3.65 | 96.2 | 291 | 1023 | 43.5 | 68.3 | 2.70 | 44.2 | 5.84 | 54.2 | 16.6 | 21.2 | 0.724 | 3.30  | 9.20 |
| 9  | 3.24 | 84.8 | 239 | 1564 | 42.1 | 91.4 | 2.22 | 31.4 | 4.23 | 24.4 | 10.3 | 6.28 | 0.007 | 0.693 | 2.87 |
| 10 | 2.14 | 84.4 | 232 | 1479 | 41.8 | 91.3 | 2.68 | 29.2 | 4.21 | 24.6 | 9.99 | 6.09 | 0.021 | 0.706 | 3.01 |
| 11 | 2.14 | 91.2 | 337 | 1003 | 45.4 | 84.5 | 2.08 | 42.8 | 6.65 | 30.7 | 17.9 | 18.1 | 0.051 | 1.68  | 7.25 |
| 12 | 6.27 | 106  | 488 | 351  | 55.5 | 83.6 | 3.73 | 61.5 | 11.0 | 35.8 | 29.3 | 34.3 | 0.060 | 2.77  | 11.6 |
| 13 | 3.55 | 103  | 453 | 1247 | 48.6 | 89.9 | 2.34 | 47.2 | 8.65 | 34.7 | 21.6 | 25.2 | 0.046 | 2.05  | 8.66 |
| 14 | 5.18 | 103  | 389 | 426  | 48.0 | 81.1 | 2.31 | 51.0 | 8.85 | 32.4 | 22.1 | 25.5 | 0.031 | 2.23  | 9.26 |
| 15 | 12.6 | 105  | 385 | 167  | 52.1 | 74.2 | 5.53 | 60.1 | 8.63 | 34.8 | 26.7 | 30.3 | 0.174 | 2.89  | 11.5 |
| 26 | 5.60 | 154  | 392 | 417  | 47.0 | 42.9 | 2.32 | 60.4 | 8.21 | 28.2 | 28.4 | 27.7 | 0.050 | 2.53  | 10.3 |
| 27 | 8.51 | 165  | 410 | 277  | 46.1 | 32.5 | 5.19 | 66.5 | 8.24 | 25.4 | 32.1 | 30.2 | 0.052 | 2.67  | 10.9 |
| 28 | 6.14 | 166  | 412 | 307  | 45.9 | 35.1 | 3.46 | 62.2 | 7.76 | 25.8 | 31.9 | 30.8 | 0.050 | 2.89  | 11.2 |
| 29 | 7.23 | 155  | 376 | 328  | 49.0 | 35.3 | 4.35 | 71.0 | 7.92 | 25.5 | 30.9 | 27.4 | 0.029 | 2.60  | 10.7 |
| 30 | 6.32 | 119  | 419 | 53.5 | 50.0 | 33.9 | 2.70 | 82.9 | 9.92 | 31.8 | 52.9 | 53.2 | 0.086 | 5.99  | 25.3 |
| 31 | 4.52 | 116  | 388 | 20.1 | 46.7 | 22.4 | 2.99 | 101  | 11.0 | 35.3 | 61.0 | 64.7 | 0.125 | 7.79  | 32.5 |
| 32 | 4.77 | 118  | 388 | 16.9 | 47.0 | 23.3 | 2.75 | 89.4 | 11.6 | 36.1 | 63.5 | 69.2 | 0.113 | 8.20  | 33.6 |
| 33 | 4.59 | 134  | 375 | 167  | 46.5 | 36.7 | 2.68 | 72.7 | 7.73 | 26.4 | 30.9 | 26.7 | 0.044 | 2.68  | 11.6 |
| 34 | 5.04 | 141  | 321 | 263  | 48.0 | 30.4 | 2.61 | 69.7 | 6.31 | 23.8 | 25.8 | 20.7 | 0.037 | 2.05  | 8.88 |
| 35 | 5.82 | 145  | 324 | 226  | 47.1 | 34.3 | 2.76 | 69.6 | 6.44 | 29.1 | 27.1 | 25.8 | 0.231 | 2.69  | 10.1 |
| 36 | 4.56 | 141  | 324 | 278  | 46.2 | 28.5 | 2.64 | 63.9 | 6.55 | 24.1 | 25.8 | 21.1 | 0.051 | 2.12  | 8.46 |
| 37 | 5.76 | 128  | 326 | 160  | 52.9 | 38.2 | 2.92 | 78.8 | 5.95 | 23.9 | 26.6 | 19.8 | 0.029 | 2.48  | 9.55 |
| 38 | 5.06 | 144  | 333 | 287  | 44.3 | 30.8 | 3.22 | 65.3 | 6.43 | 27.7 | 25.9 | 25.9 | 0.198 | 2.55  | 9.10 |
| 39 | 6.16 | 114  | 425 | 120  | 53.9 | 48.7 | 3.07 | 69.2 | 8.25 | 29.8 | 32.3 | 30.6 | 0.043 | 3.02  | 12.6 |
| 40 | 11.7 | 110  | 489 | 152  | 56.2 | 49.2 | 6.05 | 74.1 | 10.6 | 31.8 | 32.1 | 36.1 | 0.054 | 3.00  | 12.5 |

---

17BG03-2@

|   |      |     |     |      |      |      |      |      |      |      |      |      |       |      |      |
|---|------|-----|-----|------|------|------|------|------|------|------|------|------|-------|------|------|
| 1 | 9.60 | 130 | 264 | 34.7 | 42.1 | 26.9 | 3.65 | 56.8 | 6.22 | 31.2 | 27.3 | 24.8 | 0.056 | 2.68 | 11.7 |
| 2 | 10.1 | 111 | 406 | 99.2 | 54.4 | 53.8 | 4.34 | 71.0 | 7.88 | 28.1 | 28.2 | 27.2 | 0.036 | 2.54 | 10.5 |

|    |      |     |     |     |      |      |      |      |      |      |      |      |       |      |      |
|----|------|-----|-----|-----|------|------|------|------|------|------|------|------|-------|------|------|
| 3  | 8.50 | 127 | 346 | 100 | 48.0 | 36.8 | 2.84 | 64.2 | 6.76 | 25.9 | 28.2 | 25.7 | 0.040 | 2.46 | 10.1 |
| 4  | 6.38 | 129 | 330 | 216 | 45.5 | 37.6 | 2.60 | 57.1 | 7.03 | 27.8 | 23.6 | 21.5 | 0.040 | 2.14 | 9.29 |
| 5  | 6.15 | 138 | 333 | 268 | 44.2 | 34.5 | 2.19 | 57.6 | 7.30 | 28.6 | 24.3 | 23.5 | 0.034 | 2.22 | 9.57 |
| 6  | 6.81 | 153 | 392 | 156 | 45.9 | 34.0 | 3.10 | 61.3 | 8.29 | 29.7 | 30.6 | 30.3 | 0.041 | 3.07 | 12.9 |
| 7  | 6.92 | 140 | 354 | 293 | 43.0 | 36.1 | 2.74 | 54.3 | 7.40 | 30.4 | 26.6 | 25.1 | 0.028 | 2.54 | 10.8 |
| 8  | 9.05 | 139 | 366 | 124 | 47.6 | 39.9 | 3.85 | 68.5 | 7.01 | 28.3 | 29.8 | 26.9 | 0.068 | 2.60 | 11.8 |
| 9  | 8.91 | 127 | 446 | 126 | 49.6 | 48.5 | 4.41 | 69.0 | 9.19 | 33.4 | 32.2 | 34.6 | 0.034 | 3.32 | 13.7 |
| 10 | 8.68 | 127 | 345 | 921 | 41.2 | 48.6 | 3.92 | 44.9 | 7.97 | 31.0 | 23.1 | 26.8 | 0.025 | 2.17 | 8.95 |
| 14 | 10.7 | 109 | 355 | 263 | 48.6 | 62.4 | 5.65 | 59.1 | 7.36 | 29.5 | 23.3 | 23.1 | 0.037 | 2.22 | 9.54 |
| 15 | 8.95 | 115 | 296 | 320 | 47.8 | 44.7 | 4.26 | 57.6 | 6.36 | 26.9 | 19.5 | 16.0 | 0.042 | 1.80 | 7.42 |
| 16 | 6.88 | 124 | 314 | 195 | 47.2 | 43.0 | 3.07 | 60.7 | 6.52 | 27.8 | 22.7 | 19.6 | 0.022 | 2.03 | 8.10 |
| 17 | 7.96 | 124 | 319 | 220 | 45.7 | 39.5 | 4.42 | 60.7 | 6.23 | 30.4 | 22.5 | 20.3 | 0.084 | 2.04 | 8.92 |
| 18 | 7.73 | 148 | 419 | 289 | 45.3 | 39.2 | 4.24 | 55.3 | 8.85 | 34.5 | 30.3 | 32.5 | 0.056 | 2.93 | 12.1 |
| 19 | 9.74 | 114 | 436 | 298 | 51.3 | 60.1 | 6.07 | 63.4 | 9.49 | 34.0 | 27.9 | 31.6 | 0.053 | 2.90 | 12.2 |
| 39 | 10.9 | 142 | 361 | 233 | 46.2 | 39.9 | 6.62 | 60.3 | 7.55 | 28.2 | 27.8 | 27.8 | 0.042 | 2.61 | 10.6 |
| 40 | 8.29 | 135 | 337 | 429 | 44.7 | 40.3 | 3.82 | 56.5 | 7.18 | 29.0 | 23.8 | 22.6 | 0.027 | 2.16 | 9.18 |
| 41 | 6.42 | 123 | 338 | 342 | 48.2 | 48.2 | 3.20 | 59.5 | 7.51 | 27.5 | 24.0 | 22.3 | 0.022 | 2.06 | 9.03 |
| 42 | 5.41 | 130 | 348 | 594 | 45.6 | 48.7 | 2.55 | 53.8 | 7.68 | 31.5 | 23.2 | 24.4 | 0.048 | 2.29 | 9.42 |
| 43 | 9.26 | 111 | 473 | 269 | 53.6 | 58.6 | 4.40 | 64.8 | 10.1 | 32.7 | 30.6 | 33.3 | 0.048 | 2.70 | 11.3 |
| 44 | 9.04 | 139 | 407 | 375 | 47.1 | 44.7 | 5.39 | 57.0 | 9.49 | 30.4 | 28.9 | 30.7 | 0.045 | 2.70 | 11.6 |
| 45 | 12.0 | 108 | 462 | 234 | 54.5 | 62.0 | 8.17 | 66.0 | 9.64 | 32.1 | 29.1 | 31.3 | 0.052 | 2.85 | 11.8 |
| 46 | 8.40 | 134 | 342 | 532 | 45.6 | 41.3 | 4.20 | 54.5 | 7.54 | 29.9 | 23.7 | 24.2 | 0.033 | 2.26 | 9.39 |
| 47 | 7.19 | 140 | 407 | 319 | 46.1 | 43.4 | 3.39 | 56.1 | 8.56 | 32.1 | 29.1 | 33.3 | 0.071 | 2.95 | 11.5 |
| 48 | 10.5 | 139 | 385 | 178 | 48.2 | 42.5 | 5.44 | 60.7 | 8.41 | 31.9 | 31.3 | 30.3 | 0.046 | 3.01 | 12.2 |

---

17BG03-3@

|   |      |     |     |      |      |      |      |      |      |      |      |      |       |      |      |
|---|------|-----|-----|------|------|------|------|------|------|------|------|------|-------|------|------|
| 1 | 13.5 | 134 | 370 | 63.0 | 53.9 | 42.9 | 6.01 | 74.2 | 7.58 | 26.9 | 31.2 | 26.2 | 0.028 | 2.72 | 11.2 |
|---|------|-----|-----|------|------|------|------|------|------|------|------|------|-------|------|------|

|    |      |     |     |      |      |      |      |      |       |      |      |      |       |      |      |
|----|------|-----|-----|------|------|------|------|------|-------|------|------|------|-------|------|------|
| 2  | 5.54 | 156 | 360 | 122  | 47.3 | 34.7 | 3.10 | 63.9 | 7.73  | 31.3 | 29.1 | 28.0 | 0.044 | 2.77 | 11.1 |
| 3  | 3.33 | 146 | 420 | 183  | 47.7 | 39.7 | 2.93 | 58.5 | 9.31  | 31.3 | 31.1 | 34.2 | 0.049 | 2.97 | 12.1 |
| 4  | 3.68 | 147 | 380 | 473  | 45.7 | 36.9 | 2.18 | 54.9 | 7.70  | 30.7 | 26.8 | 28.4 | 0.030 | 2.54 | 10.6 |
| 5  | 3.97 | 134 | 418 | 113  | 49.0 | 46.5 | 2.61 | 59.3 | 9.45  | 33.0 | 30.4 | 31.4 | 0.052 | 3.00 | 11.5 |
| 6  | 4.78 | 159 | 402 | 131  | 46.0 | 36.8 | 2.86 | 60.1 | 7.85  | 31.8 | 29.8 | 32.0 | 0.052 | 2.85 | 11.7 |
| 7  | 3.94 | 155 | 395 | 137  | 46.0 | 36.6 | 3.41 | 61.1 | 8.57  | 28.6 | 30.4 | 31.0 | 0.052 | 2.63 | 10.7 |
| 8  | 4.81 | 150 | 387 | 122  | 45.8 | 37.9 | 3.15 | 59.8 | 7.97  | 29.6 | 28.6 | 29.7 | 0.062 | 2.64 | 10.9 |
| 9  | 7.00 | 129 | 402 | 82.9 | 50.9 | 52.5 | 3.43 | 64.4 | 8.72  | 28.9 | 28.9 | 31.4 | 0.033 | 2.54 | 10.2 |
| 10 | 7.04 | 121 | 409 | 256  | 49.2 | 54.1 | 4.27 | 60.4 | 9.25  | 31.7 | 28.3 | 29.4 | 0.077 | 2.70 | 10.8 |
| 11 | 4.64 | 154 | 360 | 246  | 46.4 | 39.7 | 2.87 | 55.7 | 7.68  | 29.4 | 27.5 | 26.8 | 0.041 | 2.61 | 10.8 |
| 12 | 5.41 | 143 | 364 | 490  | 45.3 | 38.7 | 2.70 | 53.3 | 7.88  | 29.0 | 25.8 | 26.7 | 0.050 | 2.37 | 9.88 |
| 13 | 9.70 | 143 | 365 | 510  | 44.8 | 40.7 | 4.61 | 54.5 | 7.79  | 29.5 | 25.2 | 26.5 | 0.032 | 2.25 | 9.30 |
| 14 | 8.50 | 148 | 375 | 489  | 47.0 | 41.6 | 4.24 | 53.2 | 8.37  | 28.9 | 26.0 | 28.2 | 0.046 | 2.23 | 9.74 |
| 15 | 5.03 | 143 | 381 | 392  | 48.0 | 42.2 | 2.42 | 58.8 | 9.02  | 40.3 | 27.1 | 30.1 | 0.033 | 2.28 | 9.91 |
| 16 | 7.00 | 151 | 360 | 130  | 44.5 | 38.9 | 4.27 | 61.6 | 7.53  | 29.9 | 29.2 | 28.8 | 0.072 | 2.96 | 11.4 |
| 17 | 4.47 | 159 | 361 | 140  | 46.9 | 29.8 | 2.33 | 63.8 | 7.47  | 27.7 | 29.7 | 30.0 | 0.057 | 2.75 | 11.3 |
| 18 | 7.65 | 151 | 372 | 102  | 47.9 | 32.5 | 3.44 | 67.0 | 8.41  | 24.8 | 32.4 | 32.1 | 0.052 | 2.73 | 11.3 |
| 19 | 9.92 | 126 | 443 | 110  | 55.1 | 51.1 | 4.67 | 70.8 | 9.40  | 30.7 | 33.1 | 35.3 | 0.075 | 2.95 | 12.5 |
| 20 | 9.11 | 118 | 496 | 95.1 | 57.2 | 57.9 | 4.84 | 72.8 | 10.9  | 29.7 | 34.4 | 39.3 | 0.071 | 3.06 | 12.6 |
| 68 | 5.39 | 123 | 375 | 178  | 47.6 | 49.1 | 3.09 | 57.7 | 8.80  | 29.3 | 25.6 | 26.8 | 0.056 | 2.51 | 9.64 |
| 69 | 1.98 | 133 | 354 | 369  | 45.1 | 42.6 | 2.66 | 55.0 | 7.48  | 31.1 | 24.7 | 24.7 | 0.061 | 2.54 | 9.89 |
| 70 | 4.35 | 111 | 465 | 400  | 48.7 | 78.4 | 5.46 | 51.9 | 10.40 | 33.5 | 28.3 | 32.4 | 0.071 | 2.69 | 11.1 |
| 71 | 3.72 | 128 | 431 | 282  | 48.8 | 56.3 | 2.33 | 55.1 | 8.92  | 30.8 | 31.3 | 35.7 | 0.041 | 2.86 | 12.1 |
| 72 | 1.88 | 140 | 394 | 336  | 45.6 | 46.8 | 2.58 | 57.6 | 8.51  | 31.7 | 29.4 | 29.9 | 0.044 | 2.78 | 11.6 |
| 73 | 3.60 | 126 | 346 | 354  | 46.0 | 46.6 | 2.09 | 56.1 | 7.21  | 28.7 | 24.4 | 23.1 | 0.042 | 2.33 | 9.44 |
| 74 | 2.70 | 121 | 405 | 260  | 48.1 | 49.4 | 2.23 | 60.0 | 8.81  | 32.4 | 27.9 | 30.7 | 0.053 | 2.83 | 11.5 |

|     |      |     |     |      |      |      |      |      |      |      |      |      |       |      |      |
|-----|------|-----|-----|------|------|------|------|------|------|------|------|------|-------|------|------|
| 75  | 2.74 | 156 | 386 | 178  | 46.6 | 33.5 | 2.63 | 60.3 | 8.35 | 32.5 | 32.7 | 33.5 | 0.063 | 3.01 | 12.3 |
| 76  | 3.60 | 128 | 339 | 353  | 47.6 | 48.8 | 2.05 | 59.2 | 7.44 | 29.2 | 24.5 | 22.2 | 0.030 | 2.21 | 9.26 |
| 77  | 4.94 | 167 | 368 | 139  | 46.0 | 33.4 | 2.91 | 58.2 | 8.39 | 32.2 | 31.6 | 33.4 | 0.072 | 3.02 | 12.8 |
| 78  | 3.92 | 119 | 332 | 340  | 48.5 | 51.7 | 2.02 | 58.5 | 6.74 | 27.6 | 23.0 | 21.4 | 0.027 | 2.09 | 8.64 |
| 79  | 4.10 | 118 | 359 | 212  | 50.8 | 53.5 | 2.28 | 61.7 | 7.71 | 33.6 | 26.1 | 26.9 | 0.218 | 2.80 | 11.0 |
| 80  | 4.13 | 138 | 372 | 229  | 48.9 | 51.2 | 2.43 | 59.9 | 7.72 | 28.1 | 27.7 | 28.0 | 0.025 | 2.57 | 10.3 |
| 81  | 2.93 | 145 | 365 | 540  | 46.2 | 46.0 | 2.32 | 53.6 | 7.33 | 30.1 | 25.1 | 26.6 | 0.061 | 2.50 | 9.86 |
| 82  | 5.66 | 136 | 355 | 360  | 45.4 | 41.8 | 2.75 | 59.5 | 7.84 | 28.4 | 25.0 | 25.7 | 0.041 | 2.13 | 9.20 |
| 109 | 10.8 | 136 | 380 | 383  | 48.8 | 52.5 | 5.93 | 60.8 | 7.85 | 31.9 | 27.4 | 28.8 | 0.048 | 2.57 | 10.3 |
| 110 | 17.1 | 113 | 354 | 283  | 47.5 | 56.4 | 3.82 | 56.8 | 7.95 | 30.3 | 26.2 | 33.9 | 0.384 | 2.84 | 10.4 |
| 111 | 15.4 | 113 | 304 | 297  | 53.4 | 65.6 | 5.78 | 67.0 | 7.47 | 31.4 | 23.7 | 25.3 | 0.077 | 2.49 | 9.82 |
| 112 | 19.3 | 107 | 400 | 212  | 51.9 | 62.1 | 7.93 | 62.8 | 8.31 | 30.7 | 26.4 | 28.1 | 0.088 | 2.46 | 9.88 |
| 113 | 10.7 | 107 | 382 | 56.9 | 50.3 | 64.1 | 5.58 | 63.2 | 8.47 | 31.6 | 30.1 | 33.6 | 0.073 | 2.94 | 11.4 |

Table S6. (continued)

| Spot      | Pr   | Nd   | Sm   | Eu    | Gd   | Tb    | Dy   | Ho    | Er   | Tm    | Yb   | Lu    | Hf    | Pb    | Th    |
|-----------|------|------|------|-------|------|-------|------|-------|------|-------|------|-------|-------|-------|-------|
| 16BG11-2@ |      |      |      |       |      |       |      |       |      |       |      |       |       |       |       |
| 6         | 1.71 | 10.5 | 3.70 | 0.983 | 4.15 | 0.632 | 4.13 | 0.767 | 2.38 | 0.325 | 2.28 | 0.250 | 1.090 | 0.101 | 0.046 |
| 7         | 1.73 | 10.7 | 3.57 | 0.927 | 4.46 | 0.736 | 4.41 | 1.01  | 2.89 | 0.338 | 2.56 | 0.373 | 0.697 | 0.117 | 0.047 |
| 8         | 1.75 | 10.1 | 3.23 | 0.957 | 4.38 | 0.656 | 4.73 | 0.883 | 2.57 | 0.332 | 1.96 | 0.302 | 0.967 | 0.114 | 0.042 |
| 9         | 1.46 | 8.68 | 2.87 | 0.817 | 3.46 | 0.624 | 3.79 | 0.737 | 2.25 | 0.302 | 1.95 | 0.248 | 0.694 | 0.088 | 0.029 |
| 10        | 1.68 | 10.8 | 3.14 | 0.969 | 4.26 | 0.628 | 4.43 | 0.785 | 2.47 | 0.295 | 1.74 | 0.234 | 0.973 | 0.063 | 0.025 |
| 11        | 2.19 | 13.1 | 4.12 | 1.20  | 4.93 | 0.722 | 4.90 | 1.10  | 3.33 | 0.418 | 2.58 | 0.353 | 1.56  | 0.112 | 0.052 |
| 12        | 2.17 | 12.7 | 4.49 | 1.33  | 5.58 | 0.834 | 5.00 | 1.03  | 3.31 | 0.422 | 2.27 | 0.331 | 1.37  | 1.65  | 0.060 |
| 13        | 1.84 | 11.2 | 3.92 | 0.958 | 4.42 | 0.689 | 4.69 | 0.960 | 2.75 | 0.360 | 2.11 | 0.283 | 0.973 | 0.102 | 0.052 |



|    |      |      |      |       |      |       |      |       |      |       |      |       |       |       |       |
|----|------|------|------|-------|------|-------|------|-------|------|-------|------|-------|-------|-------|-------|
| 14 | 2.20 | 12.8 | 4.28 | 1.28  | 5.53 | 0.918 | 4.78 | 1.12  | 3.32 | 0.412 | 2.53 | 0.379 | 1.21  | 0.104 | 0.061 |
| 15 | 1.47 | 8.04 | 2.73 | 0.803 | 3.84 | 0.640 | 3.99 | 0.928 | 2.19 | 0.254 | 1.67 | 0.306 | 0.794 | 0.052 | 0.031 |
| 16 | 1.49 | 8.81 | 2.98 | 0.924 | 4.02 | 0.576 | 4.24 | 0.689 | 2.43 | 0.279 | 1.86 | 0.309 | 1.05  | 0.106 | 0.056 |
| 17 | 1.82 | 11.2 | 3.64 | 0.897 | 4.38 | 0.685 | 4.25 | 0.986 | 2.84 | 0.389 | 2.15 | 0.292 | 0.891 | 0.105 | 0.045 |
| 18 | 1.64 | 10.4 | 3.02 | 1.01  | 4.56 | 0.613 | 4.52 | 0.939 | 2.70 | 0.341 | 2.34 | 0.286 | 0.959 | 0.113 | 0.059 |
| 19 | 1.78 | 10.7 | 3.42 | 0.936 | 4.10 | 0.706 | 4.09 | 0.840 | 2.37 | 0.308 | 1.86 | 0.316 | 1.02  | 0.097 | 0.044 |
| 20 | 2.05 | 11.8 | 3.91 | 1.23  | 5.47 | 0.837 | 5.45 | 1.04  | 2.83 | 0.460 | 2.82 | 0.385 | 1.39  | 0.129 | 0.067 |

---

17BG03-1@

|    |       |      |      |       |      |       |      |       |       |       |       |       |       |       |       |
|----|-------|------|------|-------|------|-------|------|-------|-------|-------|-------|-------|-------|-------|-------|
| 1  | 1.38  | 8.65 | 2.88 | 0.840 | 3.56 | 0.589 | 3.69 | 0.722 | 2.20  | 0.238 | 2.02  | 0.224 | 0.831 | 0.105 | 0.051 |
| 2  | 1.62  | 8.30 | 2.61 | 0.922 | 3.32 | 0.522 | 3.45 | 0.721 | 2.18  | 0.254 | 1.35  | 0.236 | 1.03  | 0.915 | 0.827 |
| 3  | 2.28  | 15.3 | 4.90 | 1.37  | 5.68 | 0.908 | 5.78 | 1.10  | 3.34  | 0.441 | 2.54  | 0.322 | 1.58  | 0.099 | 0.080 |
| 4  | 0.700 | 4.04 | 1.67 | 0.505 | 1.69 | 0.264 | 1.71 | 0.353 | 0.977 | 0.142 | 0.901 | 0.110 | 0.324 | 0.047 | 0.018 |
| 5  | 1.83  | 10.3 | 3.49 | 0.964 | 4.69 | 0.647 | 3.88 | 0.872 | 2.43  | 0.334 | 2.16  | 0.290 | 1.08  | 0.107 | 0.075 |
| 6  | 2.15  | 12.1 | 4.14 | 1.14  | 5.36 | 0.799 | 5.20 | 0.941 | 2.81  | 0.350 | 2.42  | 0.363 | 1.33  | 0.101 | 0.050 |
| 7  | 0.554 | 4.07 | 1.40 | 0.425 | 1.71 | 0.297 | 1.73 | 0.314 | 0.958 | 0.128 | 0.811 | 0.124 | 0.320 | 0.066 | 0.015 |
| 8  | 1.52  | 7.64 | 2.18 | 0.764 | 2.99 | 0.446 | 3.30 | 0.616 | 1.67  | 0.234 | 1.58  | 0.206 | 0.813 | 0.882 | 0.771 |
| 9  | 0.570 | 3.50 | 1.30 | 0.409 | 1.92 | 0.239 | 1.88 | 0.368 | 0.938 | 0.128 | 0.930 | 0.097 | 0.279 | 0.038 | 0.010 |
| 10 | 0.568 | 3.91 | 1.26 | 0.469 | 1.77 | 0.309 | 2.05 | 0.340 | 1.07  | 0.112 | 0.961 | 0.117 | 0.240 | 0.074 | 0.013 |
| 11 | 1.42  | 8.05 | 2.72 | 0.892 | 3.22 | 0.566 | 3.39 | 0.701 | 2.04  | 0.277 | 1.48  | 0.207 | 0.939 | 0.093 | 0.070 |
| 12 | 2.12  | 13.4 | 4.88 | 1.11  | 5.36 | 0.862 | 5.91 | 1.08  | 3.00  | 0.465 | 2.70  | 0.369 | 1.55  | 0.145 | 0.070 |
| 13 | 1.68  | 10.8 | 3.31 | 1.08  | 4.31 | 0.628 | 4.30 | 0.844 | 2.50  | 0.305 | 2.03  | 0.268 | 1.23  | 0.089 | 0.090 |
| 14 | 1.88  | 11.2 | 3.60 | 0.971 | 4.16 | 0.668 | 4.01 | 0.877 | 2.15  | 0.336 | 1.74  | 0.270 | 1.07  | 0.101 | 0.041 |
| 15 | 2.14  | 11.7 | 4.73 | 1.12  | 4.73 | 0.786 | 5.36 | 0.970 | 3.37  | 0.405 | 2.36  | 0.331 | 1.39  | 0.250 | 0.177 |
| 26 | 2.03  | 12.9 | 3.57 | 1.16  | 5.40 | 0.851 | 5.04 | 1.13  | 3.13  | 0.319 | 2.59  | 0.375 | 1.17  | 0.114 | 0.078 |
| 27 | 2.12  | 13.0 | 4.28 | 1.21  | 5.76 | 0.913 | 5.52 | 1.26  | 3.30  | 0.478 | 3.00  | 0.423 | 1.41  | 0.106 | 0.079 |
| 28 | 2.07  | 12.8 | 4.48 | 1.20  | 6.03 | 0.881 | 5.88 | 1.23  | 3.40  | 0.415 | 3.06  | 0.438 | 1.33  | 0.143 | 0.073 |

|    |      |      |      |       |      |       |      |       |      |       |      |       |       |       |       |
|----|------|------|------|-------|------|-------|------|-------|------|-------|------|-------|-------|-------|-------|
| 29 | 2.09 | 12.7 | 4.71 | 1.26  | 5.30 | 0.834 | 5.50 | 1.16  | 2.82 | 0.402 | 2.98 | 0.415 | 1.17  | 0.114 | 0.081 |
| 30 | 4.73 | 28.2 | 8.99 | 1.81  | 9.82 | 1.53  | 9.82 | 2.00  | 5.98 | 0.690 | 5.02 | 0.696 | 2.15  | 0.217 | 0.091 |
| 31 | 5.82 | 37.6 | 11.0 | 2.68  | 13.0 | 1.88  | 12.3 | 2.46  | 6.61 | 0.904 | 5.52 | 0.775 | 2.64  | 0.284 | 0.154 |
| 32 | 6.33 | 36.5 | 11.3 | 2.71  | 12.9 | 2.04  | 12.9 | 2.44  | 6.72 | 0.936 | 5.92 | 0.781 | 2.86  | 0.221 | 0.156 |
| 33 | 2.14 | 13.3 | 4.82 | 1.17  | 5.47 | 0.878 | 5.93 | 1.11  | 3.61 | 0.431 | 2.62 | 0.396 | 1.13  | 0.154 | 0.051 |
| 34 | 1.64 | 10.4 | 3.51 | 0.908 | 4.67 | 0.692 | 4.94 | 0.980 | 2.86 | 0.352 | 2.83 | 0.358 | 0.766 | 0.149 | 0.048 |
| 35 | 1.78 | 10.9 | 3.76 | 0.955 | 4.59 | 0.717 | 4.94 | 0.981 | 3.11 | 0.301 | 2.39 | 0.318 | 1.02  | 0.397 | 0.316 |
| 36 | 1.62 | 10.7 | 3.29 | 0.878 | 4.33 | 0.677 | 4.92 | 0.930 | 2.91 | 0.304 | 2.61 | 0.359 | 0.976 | 0.113 | 0.061 |
| 37 | 1.78 | 10.5 | 3.42 | 0.879 | 4.25 | 0.725 | 5.12 | 0.986 | 2.97 | 0.343 | 2.26 | 0.341 | 0.764 | 0.122 | 0.052 |
| 38 | 1.67 | 10.7 | 3.34 | 1.03  | 4.81 | 0.687 | 4.73 | 0.924 | 2.82 | 0.394 | 2.51 | 0.380 | 1.06  | 0.267 | 0.200 |
| 39 | 2.31 | 16.1 | 5.26 | 1.26  | 6.25 | 0.872 | 5.85 | 1.29  | 3.37 | 0.468 | 2.92 | 0.436 | 1.26  | 0.142 | 0.061 |
| 40 | 2.28 | 15.7 | 4.62 | 1.31  | 5.90 | 0.853 | 5.92 | 1.13  | 3.25 | 0.480 | 2.40 | 0.429 | 1.51  | 0.113 | 0.068 |

---

17BG03-2@

|    |      |      |      |      |      |       |      |       |      |       |      |       |      |       |       |
|----|------|------|------|------|------|-------|------|-------|------|-------|------|-------|------|-------|-------|
| 1  | 2.15 | 13.1 | 4.34 | 1.11 | 5.40 | 0.738 | 5.02 | 1.07  | 3.12 | 0.363 | 2.65 | 0.341 | 1.24 | 0.088 | 0.037 |
| 2  | 1.98 | 11.2 | 3.96 | 1.10 | 5.34 | 0.807 | 5.11 | 0.980 | 2.98 | 0.339 | 2.57 | 0.306 | 1.01 | 0.121 | 0.047 |
| 3  | 1.94 | 11.6 | 4.14 | 1.09 | 4.78 | 0.817 | 5.25 | 1.03  | 3.05 | 0.373 | 2.49 | 0.336 | 1.00 | 0.073 | 0.047 |
| 4  | 1.83 | 11.0 | 3.70 | 1.10 | 4.44 | 0.682 | 4.21 | 0.858 | 2.53 | 0.328 | 1.77 | 0.290 | 0.95 | 0.074 | 0.040 |
| 5  | 1.86 | 11.4 | 3.58 | 1.13 | 4.06 | 0.697 | 4.36 | 0.856 | 2.34 | 0.357 | 2.04 | 0.259 | 1.13 | 0.071 | 0.038 |
| 6  | 2.34 | 14.4 | 4.56 | 1.32 | 5.92 | 0.869 | 5.36 | 1.12  | 2.90 | 0.315 | 2.63 | 0.378 | 1.38 | 0.078 | 0.071 |
| 7  | 2.06 | 12.3 | 4.12 | 1.20 | 4.98 | 0.802 | 4.87 | 0.895 | 2.43 | 0.352 | 2.54 | 0.335 | 1.08 | 0.051 | 0.055 |
| 8  | 2.13 | 12.8 | 4.22 | 1.12 | 5.40 | 0.800 | 5.41 | 1.09  | 3.15 | 0.385 | 2.85 | 0.397 | 1.12 | 0.101 | 0.042 |
| 9  | 2.62 | 14.7 | 4.51 | 1.54 | 6.19 | 0.990 | 5.95 | 1.27  | 3.59 | 0.449 | 2.90 | 0.417 | 1.49 | 0.101 | 0.068 |
| 10 | 1.82 | 11.2 | 4.09 | 1.02 | 3.98 | 0.704 | 4.31 | 0.885 | 2.60 | 0.305 | 2.03 | 0.280 | 1.25 | 0.068 | 0.061 |
| 14 | 1.71 | 10.9 | 4.24 | 1.04 | 4.62 | 0.618 | 4.19 | 0.900 | 2.36 | 0.324 | 2.03 | 0.290 | 1.06 | 0.079 | 0.043 |
| 15 | 1.38 | 8.6  | 2.69 | 0.81 | 3.62 | 0.498 | 3.71 | 0.789 | 1.97 | 0.240 | 1.56 | 0.268 | 0.70 | 0.070 | 0.042 |
| 16 | 1.63 | 9.5  | 3.60 | 0.94 | 3.95 | 0.616 | 3.82 | 0.856 | 2.34 | 0.355 | 1.76 | 0.264 | 0.64 | 0.095 | 0.032 |

|    |      |      |      |      |      |       |      |       |      |       |      |       |      |       |       |
|----|------|------|------|------|------|-------|------|-------|------|-------|------|-------|------|-------|-------|
| 17 | 1.61 | 9.5  | 3.66 | 0.93 | 3.95 | 0.646 | 4.83 | 0.860 | 2.55 | 0.312 | 2.04 | 0.281 | 0.93 | 0.157 | 0.090 |
| 18 | 2.35 | 14.0 | 4.49 | 1.42 | 5.48 | 0.903 | 5.51 | 1.09  | 2.86 | 0.373 | 2.53 | 0.387 | 1.40 | 0.094 | 0.053 |
| 19 | 2.17 | 12.4 | 4.36 | 1.27 | 5.13 | 0.790 | 4.56 | 0.949 | 2.73 | 0.306 | 2.11 | 0.308 | 1.35 | 0.090 | 0.072 |
| 39 | 2.11 | 12.3 | 4.11 | 1.22 | 4.78 | 0.813 | 5.13 | 1.01  | 3.20 | 0.360 | 2.75 | 0.335 | 1.21 | 0.088 | 0.059 |
| 40 | 1.73 | 10.4 | 3.39 | 1.02 | 4.10 | 0.665 | 4.44 | 0.907 | 2.48 | 0.296 | 2.15 | 0.316 | 0.98 | 0.101 | 0.039 |
| 41 | 1.70 | 10.1 | 3.52 | 1.02 | 4.32 | 0.697 | 3.94 | 0.830 | 2.53 | 0.338 | 2.02 | 0.282 | 1.00 | 0.106 | 0.048 |
| 42 | 1.81 | 11.1 | 3.69 | 1.04 | 4.60 | 0.643 | 4.37 | 0.834 | 2.31 | 0.288 | 2.08 | 0.310 | 1.02 | 0.135 | 0.070 |
| 43 | 2.21 | 13.5 | 4.65 | 1.19 | 5.38 | 0.799 | 5.47 | 1.14  | 3.54 | 0.475 | 2.60 | 0.401 | 1.37 | 0.130 | 0.052 |
| 44 | 2.24 | 12.9 | 4.08 | 1.28 | 5.20 | 0.920 | 5.04 | 0.985 | 3.28 | 0.399 | 2.62 | 0.374 | 1.27 | 0.098 | 0.059 |
| 45 | 2.33 | 13.2 | 4.73 | 1.17 | 5.07 | 0.778 | 5.45 | 1.01  | 2.78 | 0.442 | 2.65 | 0.338 | 1.30 | 0.101 | 0.079 |
| 46 | 1.79 | 10.1 | 3.79 | 1.13 | 4.29 | 0.685 | 4.23 | 0.799 | 2.44 | 0.345 | 2.17 | 0.375 | 1.10 | 0.083 | 0.032 |
| 47 | 2.27 | 13.2 | 4.24 | 1.28 | 5.65 | 0.883 | 4.92 | 1.07  | 2.95 | 0.361 | 2.59 | 0.315 | 1.40 | 0.065 | 0.077 |
| 48 | 2.33 | 13.6 | 4.57 | 1.28 | 5.84 | 0.908 | 5.95 | 1.17  | 3.28 | 0.436 | 2.67 | 0.409 | 1.42 | 0.088 | 0.065 |

17BG03-3@

|    |      |      |      |      |      |       |      |       |      |       |      |       |      |       |       |
|----|------|------|------|------|------|-------|------|-------|------|-------|------|-------|------|-------|-------|
| 1  | 2.01 | 12.6 | 4.49 | 1.37 | 6.04 | 0.820 | 5.61 | 1.11  | 2.97 | 0.400 | 2.58 | 0.386 | 1.11 | 0.094 | 0.048 |
| 2  | 2.18 | 13.4 | 4.32 | 1.16 | 5.43 | 0.826 | 5.12 | 1.15  | 2.81 | 0.399 | 2.53 | 0.357 | 1.28 | 0.087 | 0.055 |
| 3  | 2.24 | 12.9 | 4.86 | 1.52 | 5.77 | 0.877 | 5.73 | 1.08  | 3.80 | 0.419 | 2.74 | 0.365 | 1.58 | 0.102 | 0.083 |
| 4  | 2.09 | 13.5 | 3.92 | 1.18 | 5.07 | 0.774 | 4.80 | 0.956 | 2.94 | 0.321 | 2.18 | 0.354 | 1.12 | 0.059 | 0.044 |
| 5  | 2.19 | 14.3 | 4.49 | 1.22 | 5.74 | 0.934 | 5.63 | 1.09  | 3.24 | 0.499 | 2.61 | 0.361 | 1.65 | 0.093 | 0.067 |
| 6  | 2.24 | 14.4 | 4.44 | 1.17 | 5.60 | 0.934 | 5.87 | 1.16  | 3.19 | 0.407 | 2.54 | 0.386 | 1.68 | 0.132 | 0.072 |
| 7  | 1.97 | 13.5 | 4.22 | 1.14 | 5.66 | 0.811 | 5.27 | 1.09  | 3.19 | 0.384 | 2.91 | 0.348 | 1.33 | 0.061 | 0.055 |
| 8  | 2.02 | 12.8 | 4.27 | 1.11 | 5.34 | 0.743 | 5.48 | 1.02  | 3.23 | 0.373 | 2.53 | 0.357 | 1.34 | 0.087 | 0.074 |
| 9  | 2.13 | 11.6 | 4.64 | 1.20 | 5.12 | 0.823 | 5.37 | 1.15  | 3.18 | 0.438 | 2.69 | 0.363 | 1.42 | 0.106 | 0.061 |
| 10 | 1.95 | 12.3 | 4.41 | 1.10 | 4.95 | 0.827 | 5.49 | 1.03  | 3.14 | 0.391 | 2.31 | 0.320 | 1.28 | 0.125 | 0.059 |
| 11 | 2.02 | 12.3 | 4.29 | 1.17 | 5.36 | 0.840 | 5.11 | 1.01  | 2.95 | 0.355 | 2.06 | 0.354 | 1.10 | 0.121 | 0.051 |
| 12 | 1.82 | 11.0 | 3.59 | 1.11 | 4.59 | 0.667 | 4.77 | 0.938 | 2.86 | 0.349 | 2.56 | 0.316 | 1.31 | 0.080 | 0.053 |

|     |      |      |      |      |      |       |      |       |      |       |      |       |      |       |       |
|-----|------|------|------|------|------|-------|------|-------|------|-------|------|-------|------|-------|-------|
| 13  | 1.76 | 11.1 | 3.80 | 0.94 | 4.99 | 0.777 | 4.77 | 0.954 | 2.93 | 0.345 | 2.29 | 0.256 | 1.17 | 0.098 | 0.052 |
| 14  | 1.81 | 12.0 | 4.32 | 1.35 | 4.69 | 0.742 | 4.87 | 1.01  | 2.58 | 0.348 | 2.28 | 0.289 | 1.27 | 0.069 | 0.060 |
| 15  | 1.92 | 12.3 | 3.79 | 1.07 | 4.98 | 0.799 | 5.41 | 1.01  | 2.80 | 0.353 | 2.46 | 0.309 | 1.44 | 0.143 | 0.063 |
| 16  | 2.14 | 13.2 | 3.98 | 1.15 | 5.38 | 0.852 | 5.32 | 1.14  | 3.13 | 0.410 | 2.58 | 0.370 | 1.19 | 0.216 | 0.072 |
| 17  | 2.21 | 13.5 | 4.54 | 1.39 | 5.93 | 0.820 | 5.33 | 1.10  | 3.39 | 0.312 | 2.56 | 0.383 | 1.35 | 0.098 | 0.084 |
| 18  | 2.21 | 14.0 | 4.61 | 1.36 | 6.16 | 0.872 | 5.47 | 1.28  | 3.35 | 0.431 | 2.80 | 0.420 | 1.55 | 0.098 | 0.041 |
| 19  | 2.37 | 13.8 | 4.96 | 1.36 | 6.17 | 0.881 | 5.86 | 1.22  | 3.47 | 0.482 | 3.09 | 0.423 | 1.67 | 0.116 | 0.061 |
| 20  | 2.37 | 14.9 | 5.36 | 1.50 | 6.19 | 0.945 | 5.96 | 1.31  | 3.67 | 0.509 | 2.85 | 0.452 | 1.83 | 0.148 | 0.097 |
| 68  | 1.83 | 11.2 | 3.97 | 1.15 | 5.10 | 0.774 | 4.97 | 0.987 | 2.81 | 0.355 | 2.19 | 0.311 | 1.12 | 0.092 | 0.042 |
| 69  | 1.87 | 11.5 | 3.50 | 1.20 | 4.79 | 0.708 | 4.80 | 1.01  | 2.20 | 0.334 | 2.09 | 0.296 | 1.30 | 0.095 | 0.068 |
| 70  | 1.97 | 12.7 | 4.31 | 1.27 | 5.42 | 0.837 | 5.08 | 1.01  | 3.13 | 0.359 | 2.67 | 0.347 | 1.64 | 0.103 | 0.072 |
| 71  | 2.30 | 14.4 | 4.59 | 1.42 | 5.88 | 0.941 | 6.20 | 1.08  | 3.18 | 0.510 | 2.59 | 0.391 | 1.68 | 0.085 | 0.075 |
| 72  | 2.18 | 12.6 | 4.59 | 1.23 | 5.36 | 0.828 | 5.53 | 1.04  | 2.88 | 0.359 | 2.90 | 0.360 | 1.29 | 0.074 | 0.072 |
| 73  | 1.79 | 11.1 | 3.86 | 1.19 | 4.61 | 0.743 | 5.15 | 0.874 | 2.75 | 0.370 | 2.29 | 0.343 | 1.04 | 0.078 | 0.050 |
| 74  | 2.21 | 14.8 | 4.56 | 1.29 | 5.39 | 0.816 | 5.62 | 1.19  | 2.57 | 0.405 | 2.92 | 0.323 | 1.28 | 0.117 | 0.068 |
| 75  | 2.35 | 14.2 | 4.79 | 1.43 | 6.28 | 0.962 | 6.17 | 1.21  | 3.70 | 0.487 | 3.01 | 0.401 | 1.37 | 0.133 | 0.075 |
| 76  | 1.90 | 11.2 | 3.92 | 1.08 | 4.36 | 0.727 | 4.23 | 0.878 | 2.21 | 0.316 | 2.02 | 0.282 | 1.03 | 0.099 | 0.048 |
| 77  | 2.28 | 14.8 | 4.66 | 1.33 | 6.35 | 1.00  | 6.00 | 1.34  | 3.49 | 0.392 | 2.90 | 0.402 | 1.45 | 0.117 | 0.064 |
| 78  | 1.74 | 11.4 | 3.33 | 1.04 | 4.67 | 0.626 | 4.54 | 0.822 | 2.54 | 0.257 | 2.00 | 0.327 | 0.84 | 0.061 | 0.048 |
| 79  | 2.02 | 11.6 | 3.54 | 1.18 | 4.99 | 0.667 | 4.71 | 0.988 | 2.32 | 0.336 | 2.42 | 0.312 | 1.19 | 0.277 | 0.195 |
| 80  | 1.89 | 11.4 | 4.23 | 1.14 | 5.00 | 0.801 | 5.23 | 1.07  | 2.85 | 0.400 | 3.05 | 0.336 | 1.21 | 0.115 | 0.061 |
| 81  | 1.90 | 12.0 | 3.44 | 1.12 | 4.95 | 0.706 | 4.90 | 0.956 | 2.89 | 0.348 | 2.30 | 0.321 | 1.21 | 0.086 | 0.052 |
| 82  | 1.69 | 10.5 | 3.48 | 1.03 | 4.37 | 0.748 | 5.15 | 0.935 | 2.69 | 0.325 | 2.73 | 0.328 | 1.23 | 0.078 | 0.051 |
| 109 | 1.93 | 12.3 | 3.58 | 1.16 | 4.75 | 0.863 | 5.23 | 1.05  | 2.99 | 0.318 | 2.10 | 0.293 | 1.33 | 0.117 | 0.063 |
| 110 | 1.96 | 11.9 | 3.98 | 0.98 | 4.64 | 0.684 | 4.99 | 0.974 | 2.72 | 0.339 | 2.46 | 0.334 | 1.44 | 0.612 | 0.217 |
| 111 | 1.72 | 10.7 | 3.71 | 1.11 | 4.17 | 0.718 | 4.31 | 0.861 | 2.55 | 0.318 | 2.09 | 0.299 | 0.94 | 0.187 | 0.069 |

|     |      |      |      |      |      |       |      |       |      |       |      |       |      |       |       |
|-----|------|------|------|------|------|-------|------|-------|------|-------|------|-------|------|-------|-------|
| 112 | 1.80 | 11.3 | 3.98 | 1.07 | 4.65 | 0.689 | 5.06 | 0.969 | 2.88 | 0.342 | 2.00 | 0.329 | 1.04 | 0.238 | 0.099 |
| 113 | 2.20 | 12.5 | 4.62 | 1.17 | 5.29 | 0.852 | 5.95 | 1.20  | 3.45 | 0.390 | 2.74 | 0.418 | 1.54 | 0.081 | 0.061 |

3.7. Table S7: Representative orthopyroxene trace element compositions (ppm) from the Nakoulai mafic dikes.

| Spot      | Li   | Sc   | V   | Cr   | Co   | Ni   | Cu   | Zn  | Ga   | Sr    | Y    | Zr   | La    | Ce    |
|-----------|------|------|-----|------|------|------|------|-----|------|-------|------|------|-------|-------|
| 16BG11-2@ |      |      |     |      |      |      |      |     |      |       |      |      |       |       |
| 62        | 5.04 | 42.0 | 132 | 83.6 | 102  | 92.0 | 1.98 | 181 | 4.20 | 0.309 | 3.76 | 2.37 | 0.022 | 0.098 |
| 64        | 5.23 | 47.3 | 218 | 153  | 108  | 103  | 1.82 | 182 | 8.04 | 0.240 | 4.66 | 4.31 | 0.019 | 0.163 |
| 65        | 4.61 | 47.1 | 223 | 162  | 107  | 103  | 2.09 | 180 | 7.96 | 0.256 | 4.76 | 4.49 | 0.032 | 0.165 |
| 66        | 5.22 | 47.7 | 223 | 155  | 107  | 105  | 1.69 | 177 | 6.84 | 0.378 | 4.55 | 4.74 | 0.021 | 0.177 |
| 67        | 5.49 | 46.2 | 212 | 148  | 104  | 104  | 1.59 | 165 | 6.72 | 0.311 | 4.53 | 4.24 | 0.028 | 0.166 |
| 68        | 5.33 | 48.8 | 219 | 119  | 106  | 103  | 1.96 | 178 | 7.10 | 0.442 | 4.98 | 4.37 | 0.023 | 0.176 |
| 69        | 5.72 | 47.5 | 198 | 106  | 105  | 91.3 | 1.69 | 189 | 6.72 | 0.309 | 4.66 | 3.85 | 0.026 | 0.166 |
| 70        | 5.68 | 37.1 | 133 | 80   | 108  | 95.7 | 1.60 | 190 | 4.37 | 0.275 | 3.47 | 2.26 | 0.032 | 0.130 |
| 71        | 5.86 | 49.1 | 209 | 121  | 107  | 92.0 | 1.52 | 193 | 7.42 | 0.260 | 5.07 | 4.29 | 0.037 | 0.207 |
| 17BG03-1@ |      |      |     |      |      |      |      |     |      |       |      |      |       |       |
| 51        | 7.27 | 34.5 | 109 | 96.8 | 103  | 97.2 | 3.52 | 169 | 3.35 | 0.387 | 3.01 | 1.97 | 0.020 | 0.083 |
| 53        | 5.14 | 50.2 | 211 | 155  | 106  | 110  | 3.04 | 172 | 6.34 | 0.235 | 4.78 | 4.26 | 0.026 | 0.145 |
| 89        | 5.33 | 49.5 | 177 | 102  | 104  | 82.5 | 2.75 | 185 | 5.34 | 0.434 | 5.15 | 3.74 | 0.033 | 0.155 |
| 90        | 6.39 | 49.4 | 200 | 134  | 106  | 100  | 3.36 | 177 | 6.65 | 0.325 | 4.59 | 3.77 | 0.012 | 0.137 |
| 91        | 6.70 | 49.0 | 207 | 136  | 107  | 99.0 | 2.89 | 173 | 6.90 | 0.358 | 4.58 | 4.28 | 0.016 | 0.181 |
| 92        | 8.15 | 53.8 | 174 | 113  | 101  | 84.1 | 3.80 | 173 | 5.72 | 0.343 | 4.66 | 3.44 | 0.018 | 0.164 |
| 93        | 5.78 | 57.7 | 153 | 150  | 91.6 | 68.1 | 3.63 | 160 | 5.00 | 0.284 | 4.37 | 3.24 | 0.028 | 0.134 |
| 94        | 7.04 | 51.9 | 221 | 173  | 110  | 100  | 3.49 | 184 | 7.48 | 0.286 | 4.86 | 4.82 | 0.026 | 0.177 |
| 95        | 6.80 | 49.4 | 159 | 127  | 100  | 81.8 | 3.32 | 173 | 5.36 | 0.310 | 4.38 | 3.59 | 0.026 | 0.103 |

|           |      |      |     |      |      |      |      |     |      |       |      |      |       |       |
|-----------|------|------|-----|------|------|------|------|-----|------|-------|------|------|-------|-------|
| 96        | 6.52 | 50.3 | 179 | 153  | 107  | 85.3 | 5.14 | 183 | 6.33 | 1.212 | 4.77 | 3.86 | 0.044 | 0.228 |
| 97        | 7.20 | 58.3 | 177 | 132  | 97.2 | 79.9 | 3.45 | 167 | 5.64 | 0.267 | 4.74 | 3.69 | 0.018 | 0.163 |
| 101       | 6.81 | 48.5 | 201 | 150  | 106  | 104  | 3.28 | 175 | 6.43 | 0.324 | 4.63 | 4.42 | 0.026 | 0.145 |
| 102       | 6.90 | 49.3 | 167 | 168  | 102  | 102  | 3.60 | 168 | 5.47 | 0.239 | 4.25 | 3.21 | 0.016 | 0.152 |
| 103       | 7.03 | 52.5 | 202 | 117  | 107  | 107  | 3.02 | 168 | 6.82 | 0.299 | 5.16 | 5.19 | 0.023 | 0.154 |
| 17BG03-2@ |      |      |     |      |      |      |      |     |      |       |      |      |       |       |
| 31        | 5.24 | 44.5 | 158 | 154  | 108  | 118  | 3.50 | 176 | 4.66 | 0.361 | 3.56 | 3.13 | 0.029 | 0.161 |
| 32        | 6.03 | 47.7 | 174 | 148  | 107  | 114  | 3.51 | 178 | 5.16 | 0.378 | 4.30 | 3.62 | 0.030 | 0.137 |
| 56        | 5.41 | 59.1 | 176 | 102  | 101  | 78   | 3.15 | 171 | 5.60 | 0.187 | 5.45 | 4.69 | 0.032 | 0.172 |
| 57        | 7.15 | 60.1 | 189 | 81   | 103  | 83   | 3.88 | 177 | 6.44 | 0.321 | 5.50 | 4.72 | 0.030 | 0.156 |
| 58        | 6.14 | 39.9 | 112 | 150  | 114  | 109  | 1.80 | 200 | 4.78 | 0.208 | 4.31 | 2.40 | 0.031 | 0.219 |
| 61        | 7.29 | 50.9 | 216 | 159  | 108  | 98   | 3.49 | 186 | 6.98 | 0.318 | 4.96 | 5.02 | 0.037 | 0.196 |
| 17BG03-3@ |      |      |     |      |      |      |      |     |      |       |      |      |       |       |
| 105       | 6.55 | 49.5 | 166 | 112  | 105  | 108  | 3.07 | 158 | 6.59 | 0.236 | 4.62 | 4.74 | 0.018 | 0.140 |
| 106       | 6.28 | 49.5 | 168 | 130  | 103  | 104  | 3.23 | 162 | 6.85 | 0.408 | 4.51 | 4.99 | 0.014 | 0.147 |
| 107       | 6.56 | 53.5 | 202 | 31.9 | 102  | 97.5 | 3.00 | 165 | 8.34 | 3.774 | 4.72 | 6.50 | 0.044 | 0.177 |
| 108       | 10.6 | 37.4 | 109 | 28.2 | 107  | 109  | 4.72 | 173 | 4.03 | 0.340 | 3.55 | 2.37 | 0.014 | 0.114 |

Table S7. (continued)

| Spot      | Pr    | Nd    | Sm    | Eu    | Gd    | Tb    | Dy    | Ho    | Er    | Tm    | Yb    | Lu    | Hf    | Pb    |
|-----------|-------|-------|-------|-------|-------|-------|-------|-------|-------|-------|-------|-------|-------|-------|
| 16BG11-2@ |       |       |       |       |       |       |       |       |       |       |       |       |       |       |
| 62        | 0.024 | 0.199 | 0.089 | 0.052 | 0.195 | 0.092 | 0.637 | 0.133 | 0.591 | 0.111 | 0.711 | 0.114 | 0.125 | 0.014 |
| 64        | 0.040 | 0.335 | 0.190 | 0.070 | 0.368 | 0.075 | 0.534 | 0.167 | 0.527 | 0.102 | 0.928 | 0.153 | 0.189 | 0.008 |
| 65        | 0.041 | 0.311 | 0.300 | 0.100 | 0.395 | 0.091 | 0.649 | 0.178 | 0.557 | 0.126 | 0.672 | 0.123 | 0.217 | 0.006 |
| 66        | 0.041 | 0.284 | 0.169 | 0.069 | 0.337 | 0.079 | 0.512 | 0.161 | 0.577 | 0.096 | 0.618 | 0.116 | 0.134 | 0.010 |

|           |       |       |       |       |       |       |       |       |       |       |       |       |       |       |
|-----------|-------|-------|-------|-------|-------|-------|-------|-------|-------|-------|-------|-------|-------|-------|
| 67        | 0.043 | 0.318 | 0.089 | 0.055 | 0.432 | 0.075 | 0.663 | 0.179 | 0.579 | 0.075 | 0.860 | 0.123 | 0.153 | 0.000 |
| 68        | 0.039 | 0.324 | 0.294 | 0.061 | 0.398 | 0.077 | 0.493 | 0.127 | 0.520 | 0.087 | 0.733 | 0.122 | 0.171 | 0.002 |
| 69        | 0.032 | 0.327 | 0.287 | 0.051 | 0.395 | 0.062 | 0.541 | 0.158 | 0.584 | 0.109 | 0.707 | 0.105 | 0.150 | 0.025 |
| 70        | 0.031 | 0.412 | 0.137 | 0.041 | 0.216 | 0.053 | 0.487 | 0.133 | 0.426 | 0.071 | 0.554 | 0.110 | 0.087 | 0.009 |
| 71        | 0.062 | 0.315 | 0.260 | 0.052 | 0.358 | 0.087 | 0.756 | 0.198 | 0.725 | 0.099 | 0.838 | 0.135 | 0.135 | 0.014 |
| 17BG03-1@ |       |       |       |       |       |       |       |       |       |       |       |       |       |       |
| 51        | 0.041 | 0.202 | 0.125 | 0.054 | 0.166 | 0.042 | 0.475 | 0.108 | 0.350 | 0.049 | 0.482 | 0.090 | 0.117 | 0.002 |
| 53        | 0.050 | 0.412 | 0.124 | 0.072 | 0.395 | 0.082 | 0.634 | 0.145 | 0.537 | 0.105 | 0.700 | 0.128 | 0.198 | 0.000 |
| 89        | 0.046 | 0.296 | 0.176 | 0.081 | 0.351 | 0.095 | 0.716 | 0.160 | 0.581 | 0.113 | 0.779 | 0.114 | 0.282 | 0.003 |
| 90        | 0.028 | 0.434 | 0.179 | 0.041 | 0.258 | 0.064 | 0.539 | 0.168 | 0.599 | 0.067 | 0.762 | 0.146 | 0.167 | 0.005 |
| 91        | 0.035 | 0.312 | 0.176 | 0.062 | 0.280 | 0.068 | 0.616 | 0.169 | 0.740 | 0.107 | 0.983 | 0.147 | 0.206 | 0.000 |
| 92        | 0.058 | 0.305 | 0.255 | 0.059 | 0.356 | 0.064 | 0.615 | 0.188 | 0.685 | 0.093 | 0.685 | 0.117 | 0.186 | 0.011 |
| 93        | 0.046 | 0.458 | 0.146 | 0.074 | 0.223 | 0.063 | 0.688 | 0.162 | 0.477 | 0.073 | 0.752 | 0.125 | 0.123 | 0.035 |
| 94        | 0.053 | 0.234 | 0.174 | 0.062 | 0.333 | 0.074 | 0.610 | 0.178 | 0.622 | 0.097 | 0.787 | 0.146 | 0.156 | 0.015 |
| 95        | 0.036 | 0.281 | 0.183 | 0.067 | 0.258 | 0.049 | 0.566 | 0.194 | 0.657 | 0.089 | 0.507 | 0.137 | 0.166 | 0.010 |
| 96        | 0.041 | 0.375 | 0.151 | 0.047 | 0.328 | 0.071 | 0.535 | 0.158 | 0.757 | 0.095 | 0.773 | 0.134 | 0.105 | 0.046 |
| 97        | 0.052 | 0.351 | 0.274 | 0.085 | 0.175 | 0.079 | 0.743 | 0.192 | 0.624 | 0.097 | 0.870 | 0.149 | 0.098 | 0.058 |
| 101       | 0.041 | 0.368 | 0.202 | 0.070 | 0.330 | 0.072 | 0.623 | 0.193 | 0.662 | 0.110 | 0.862 | 0.105 | 0.154 | 0.004 |
| 102       | 0.029 | 0.188 | 0.156 | 0.036 | 0.333 | 0.081 | 0.613 | 0.157 | 0.646 | 0.081 | 0.740 | 0.119 | 0.176 | 0.010 |
| 103       | 0.039 | 0.489 | 0.230 | 0.041 | 0.404 | 0.087 | 0.828 | 0.192 | 0.445 | 0.099 | 0.781 | 0.124 | 0.206 | 0.004 |
| 17BG03-2@ |       |       |       |       |       |       |       |       |       |       |       |       |       |       |
| 31        | 0.035 | 0.215 | 0.142 | 0.035 | 0.271 | 0.054 | 0.582 | 0.126 | 0.553 | 0.067 | 0.626 | 0.135 | 0.124 | 0.000 |
| 32        | 0.027 | 0.292 | 0.200 | 0.049 | 0.333 | 0.087 | 0.489 | 0.205 | 0.376 | 0.083 | 0.594 | 0.103 | 0.151 | 0.000 |
| 56        | 0.050 | 0.516 | 0.119 | 0.045 | 0.315 | 0.079 | 0.639 | 0.187 | 0.694 | 0.096 | 0.979 | 0.142 | 0.210 | 0.000 |
| 57        | 0.030 | 0.303 | 0.257 | 0.087 | 0.364 | 0.078 | 0.640 | 0.231 | 0.732 | 0.081 | 1.07  | 0.161 | 0.244 | 0.009 |
| 58        | 0.052 | 0.485 | 0.265 | 0.048 | 0.310 | 0.105 | 0.601 | 0.203 | 0.635 | 0.084 | 0.715 | 0.153 | 0.112 | 0.016 |

|           |       |       |       |       |       |       |       |       |       |       |       |       |       |       |
|-----------|-------|-------|-------|-------|-------|-------|-------|-------|-------|-------|-------|-------|-------|-------|
| 61        | 0.051 | 0.188 | 0.186 | 0.093 | 0.363 | 0.072 | 0.659 | 0.214 | 0.596 | 0.084 | 0.861 | 0.150 | 0.190 | 0.011 |
| 17BG03-3@ |       |       |       |       |       |       |       |       |       |       |       |       |       |       |
| 105       | 0.021 | 0.275 | 0.169 | 0.058 | 0.265 | 0.071 | 0.746 | 0.142 | 0.488 | 0.094 | 0.712 | 0.155 | 0.245 | 0.005 |
| 106       | 0.036 | 0.317 | 0.130 | 0.036 | 0.343 | 0.093 | 0.631 | 0.147 | 0.525 | 0.078 | 0.773 | 0.119 | 0.288 | 0.018 |
| 107       | 0.038 | 0.405 | 0.184 | 0.071 | 0.385 | 0.091 | 0.607 | 0.163 | 0.643 | 0.089 | 0.713 | 0.142 | 0.307 | 0.067 |
| 108       | 0.026 | 0.231 | 0.182 | 0.042 | 0.232 | 0.039 | 0.492 | 0.134 | 0.446 | 0.094 | 0.733 | 0.113 | 0.135 | 0.007 |

3.8. Table S8: Representative plagioclase trace element compositions (ppm) from the Nakoulai mafic dikes.

| Spot       | Sc   | V     | Co   | Zn   | Ga    | Rb   | Sr  | Y    | Ba  | La   | Ce   | Pr   | Nd   | Sm   | Eu   | Gd   | Pb   |
|------------|------|-------|------|------|-------|------|-----|------|-----|------|------|------|------|------|------|------|------|
| 17BG03-2 @ |      |       |      |      |       |      |     |      |     |      |      |      |      |      |      |      |      |
| 49         | 3.36 | 2.01  | 0.34 | 5.09 | 19.99 | 1.11 | 877 | 0.28 | 121 | 2.70 | 4.48 | 0.45 | 1.33 | 0.26 | 0.46 | 0.06 | 1.93 |
| 50         | 1.45 | 2.00  | 0.28 | 3.44 | 21.85 | 0.61 | 875 | 0.27 | 137 | 3.24 | 4.74 | 0.44 | 1.75 | 0.08 | 0.55 | 0.06 | 2.03 |
| 51         | 3.00 | 2.48  | 0.47 | 4.29 | 24.37 | 0.87 | 840 | 0.25 | 144 | 2.42 | 3.99 | 0.36 | 1.41 | 0.32 | 0.58 | 0.12 | 1.97 |
| 52         | 2.94 | 1.62  | 0.43 | 4.60 | 20.27 | 0.86 | 878 | 0.18 | 126 | 2.75 | 4.59 | 0.43 | 1.24 | 0.21 | 0.47 | 0.09 | 1.98 |
| 53         | 2.43 | 2.41  | 0.94 | 5.28 | 21.83 | 1.12 | 885 | 0.27 | 118 | 2.97 | 4.78 | 0.46 | 1.27 | 0.11 | 0.45 | 0.05 | 1.93 |
| 54         | 1.98 | 2.18  | 0.99 | 4.85 | 21.06 | 1.53 | 843 | 0.11 | 119 | 2.57 | 4.04 | 0.42 | 1.68 | 0.21 | 0.47 | 0.06 | 2.03 |
| 17BG03-3 @ |      |       |      |      |       |      |     |      |     |      |      |      |      |      |      |      |      |
| 37         | 3.97 | 14.82 | 1.85 | 5.25 | 18.74 | 1.42 | 821 | 0.36 | 114 | 2.60 | 4.36 | 0.34 | 1.52 | 0.17 | 0.54 | 0.13 | 1.66 |
| 39         | 3.18 | 2.34  | 0.56 | 3.93 | 23.37 | 0.66 | 807 | 0.21 | 95  | 2.48 | 3.80 | 0.26 | 1.05 | 0.27 | 0.42 | 0.07 | 1.54 |
| 40         | 3.31 | 2.65  | 0.64 | 4.70 | 22.74 | 1.24 | 832 | 0.27 | 111 | 2.23 | 4.04 | 0.36 | 1.23 | 0.22 | 0.40 | 0.09 | 1.51 |
| 41         | 2.98 | 2.21  | 0.91 | 5.74 | 23.90 | 1.15 | 819 | 0.30 | 111 | 2.52 | 3.99 | 0.34 | 1.52 | 0.10 | 0.42 | 0.09 | 1.43 |
| 42         | 1.79 | 1.82  | 0.45 | 4.46 | 21.76 | 0.35 | 819 | 0.30 | 93  | 2.35 | 3.47 | 0.38 | 1.41 | 0.20 | 0.35 | 0.00 | 1.36 |
| 43         | 2.31 | 6.22  | 0.77 | 4.36 | 23.45 | 0.59 | 831 | 0.23 | 96  | 2.23 | 3.85 | 0.35 | 1.07 | 0.10 | 0.36 | 0.05 | 1.39 |



|    |      |       |      |      |       |      |     |      |     |      |      |      |      |      |      |      |      |
|----|------|-------|------|------|-------|------|-----|------|-----|------|------|------|------|------|------|------|------|
| 44 | 2.88 | 3.11  | 0.81 | 5.30 | 23.41 | 1.16 | 834 | 0.30 | 114 | 2.75 | 3.85 | 0.43 | 1.00 | 0.14 | 0.41 | 0.00 | 1.47 |
| 45 | 2.27 | 1.98  | 0.06 | 4.96 | 22.51 | 0.73 | 811 | 0.26 | 94  | 2.26 | 3.73 | 0.30 | 1.19 | 0.12 | 0.45 | 0.03 | 1.50 |
| 46 | 1.89 | 2.41  | 0.41 | 4.30 | 21.82 | 1.08 | 859 | 0.24 | 96  | 2.53 | 3.56 | 0.39 | 0.89 | 0.17 | 0.50 | 0.06 | 1.73 |
| 55 | 2.69 | 3.30  | 0.40 | 4.24 | 22.77 | 3.80 | 825 | 0.24 | 127 | 2.53 | 4.22 | 0.38 | 1.11 | 0.12 | 0.32 | 0.03 | 1.97 |
| 57 | 2.90 | 3.07  | 0.65 | 5.00 | 21.66 | 1.72 | 862 | 0.20 | 125 | 2.81 | 4.47 | 0.42 | 1.20 | 0.16 | 0.53 | 0.16 | 1.72 |
| 58 | 2.86 | 4.90  | 0.51 | 4.92 | 22.48 | 0.99 | 879 | 0.46 | 103 | 3.47 | 5.94 | 0.57 | 1.74 | 0.45 | 0.41 | 0.18 | 1.66 |
| 59 | 2.21 | 1.96  | 0.26 | 3.88 | 22.56 | 0.91 | 862 | 0.31 | 116 | 3.02 | 4.68 | 0.41 | 1.85 | 0.20 | 0.46 | 0.21 | 1.69 |
| 60 | 2.76 | 1.75  | 0.58 | 4.40 | 21.06 | 0.81 | 874 | 0.23 | 122 | 2.86 | 4.56 | 0.41 | 1.54 | 0.15 | 0.46 | 0.20 | 1.82 |
| 61 | 2.29 | 2.85  | 0.55 | 4.54 | 21.10 | 2.97 | 830 | 0.24 | 128 | 2.80 | 4.23 | 0.42 | 1.50 | 0.17 | 0.45 | 0.12 | 1.73 |
| 62 | 2.37 | 1.86  | 0.48 | 4.42 | 20.98 | 0.75 | 861 | 0.23 | 110 | 2.74 | 4.09 | 0.33 | 1.18 | 0.16 | 0.40 | 0.24 | 1.98 |
| 63 | 3.03 | 3.05  | 0.61 | 3.69 | 19.55 | 1.69 | 832 | 0.25 | 115 | 2.67 | 3.96 | 0.43 | 1.21 | 0.20 | 0.33 | 0.22 | 1.76 |
| 64 | 3.39 | 3.31  | 0.86 | 4.16 | 22.17 | 2.36 | 824 | 0.26 | 129 | 2.63 | 4.29 | 0.42 | 0.99 | 0.13 | 0.33 | 0.06 | 1.75 |
| 65 | 2.59 | 2.76  | 0.61 | 4.59 | 21.52 | 1.89 | 803 | 0.28 | 156 | 2.92 | 4.34 | 0.38 | 1.31 | 0.10 | 0.52 | 0.14 | 2.17 |
| 66 | 4.22 | 11.95 | 1.40 | 6.15 | 21.88 | 9.36 | 785 | 1.09 | 171 | 3.74 | 6.28 | 0.55 | 2.24 | 0.20 | 0.60 | 0.39 | 2.83 |
| 67 | 2.80 | 7.07  | 1.82 | 5.28 | 19.38 | 2.30 | 779 | 0.51 | 158 | 3.76 | 5.32 | 0.55 | 1.46 | 0.26 | 0.62 | 0.15 | 2.48 |

3.9. Table S9: Major (wt%) and trace (ppm) element data for the Nakoulai mafic dikes.

| Sample                                      | 16BG11-1 | 16BG11-2 | 16BG11-3 | 16BG11-4 | 16BG11-5 | 17BG02-1 | 17BG02-2 | 17BG03-1 | 17BG03-2 | 17BG03-3 | 17BG03-4 |
|---------------------------------------------|----------|----------|----------|----------|----------|----------|----------|----------|----------|----------|----------|
| SiO <sub>2</sub>                            | 50.04    | 53.32    | 52.47    | 52.91    | 51.98    | 49.93    | 50.24    | 52.50    | 52.77    | 52.31    | 52.32    |
| TiO <sub>2</sub>                            | 0.94     | 1.01     | 1.00     | 1.00     | 0.96     | 0.96     | 0.93     | 1.03     | 1.02     | 1.03     | 1.03     |
| Al <sub>2</sub> O <sub>3</sub>              | 15.71    | 16.41    | 16.12    | 16.10    | 16.39    | 16.29    | 16.28    | 16.54    | 16.39    | 16.57    | 16.52    |
| Fe <sub>2</sub> O <sub>3</sub> <sup>T</sup> | 8.05     | 8.75     | 9.19     | 9.22     | 8.45     | 8.07     | 7.92     | 8.97     | 9.10     | 9.14     | 9.03     |
| MnO                                         | 0.17     | 0.15     | 0.17     | 0.15     | 0.14     | 0.18     | 0.19     | 0.14     | 0.15     | 0.14     | 0.13     |

|                               |       |       |       |        |        |       |       |       |       |       |       |
|-------------------------------|-------|-------|-------|--------|--------|-------|-------|-------|-------|-------|-------|
| MgO                           | 3.46  | 4.80  | 5.01  | 5.08   | 2.67   | 2.98  | 2.86  | 4.84  | 5.14  | 4.76  | 4.86  |
| CaO                           | 9.87  | 8.84  | 8.67  | 8.68   | 10.26  | 10.64 | 10.76 | 8.73  | 8.56  | 8.78  | 8.93  |
| Na <sub>2</sub> O             | 2.96  | 3.15  | 3.13  | 3.12   | 2.75   | 2.78  | 2.71  | 2.87  | 2.79  | 2.75  | 2.79  |
| K <sub>2</sub> O              | 0.96  | 1.46  | 1.44  | 1.43   | 0.85   | 1.23  | 1.14  | 1.44  | 1.42  | 1.01  | 1.03  |
| P <sub>2</sub> O <sub>5</sub> | 0.20  | 0.21  | 0.21  | 0.21   | 0.21   | 0.20  | 0.20  | 0.23  | 0.23  | 0.23  | 0.23  |
| LOI                           | 7.17  | 1.83  | 2.19  | 2.10   | 5.44   | 6.42  | 6.45  | 2.21  | 1.66  | 2.63  | 2.44  |
| Total                         | 99.53 | 99.93 | 99.60 | 100.01 | 100.09 | 99.68 | 99.67 | 99.49 | 99.22 | 99.36 | 99.31 |
| Mg <sup>#</sup>               | 46.0  | 52.0  | 51.9  | 52.2   | 38.5   | 42.3  | 41.7  | 51.7  | 52.8  | 50.8  | 51.6  |
| Sc                            | 26.0  | 27.0  | 26.4  | 27.4   | 25.4   | 25.8  | 25.6  | 26.8  | 27.5  | 27.0  | 27.0  |
| Ti                            | 5917  | 6224  | 5943  | 6183   | 5996   | 5751  | 5675  | 6005  | 6190  | 6155  | 6064  |
| V                             | 246   | 255   | 241   | 249    | 244    | 239   | 236   | 244   | 253   | 247   | 248   |
| Cr                            | 58.0  | 58.3  | 58.8  | 66.5   | 54.4   | 104   | 97.8  | 112   | 111   | 91.5  | 104   |
| Mn                            | 1350  | 1211  | 1264  | 1225   | 1118   | 1333  | 1419  | 1074  | 1170  | 1069  | 1019  |
| Co                            | 25.2  | 26.5  | 26.8  | 28.2   | 23.0   | 26.8  | 24.1  | 26.6  | 27.7  | 27.2  | 27.2  |
| Ni                            | 19.2  | 19.1  | 19.2  | 19.9   | 18.3   | 19.9  | 18.9  | 19.2  | 20.1  | 18.8  | 19.2  |
| Cu                            | 20.7  | 17.5  | 22.7  | 24.2   | 21.6   | 29.9  | 31.9  | 41.6  | 42.0  | 41.9  | 42.0  |
| Zn                            | 86.1  | 84.9  | 85.1  | 89.2   | 88.2   | 79.1  | 74.1  | 83.9  | 85.3  | 87.1  | 89.2  |
| Ga                            | 18.0  | 18.4  | 17.9  | 18.4   | 18.5   | 18.4  | 18.3  | 18.6  | 18.9  | 19.3  | 18.9  |
| Ge                            | 2.35  | 2.66  | 2.64  | 2.66   | 2.47   | 2.31  | 2.27  | 2.55  | 2.73  | 2.73  | 2.67  |
| Rb                            | 23.8  | 39.2  | 37.1  | 38.0   | 20.0   | 29.5  | 26.4  | 27.1  | 30.5  | 19.1  | 17.0  |
| Sr                            | 314   | 387   | 378   | 383    | 389    | 401   | 394   | 425   | 422   | 440   | 432   |
| Y                             | 23.2  | 23.6  | 23.2  | 23.3   | 23.0   | 22.0  | 21.1  | 23.4  | 24.1  | 24.1  | 23.9  |
| Zr                            | 119   | 125   | 120   | 124    | 121    | 120   | 114   | 125   | 128   | 129   | 128   |
| Nb                            | 7.67  | 8.18  | 7.95  | 8.26   | 7.97   | 7.73  | 7.24  | 8.08  | 8.25  | 8.34  | 8.25  |
| Cs                            | 3.12  | 0.711 | 0.988 | 0.744  | 1.28   | 0.898 | 1.25  | 3.85  | 7.26  | 4.47  | 4.06  |
| Ba                            | 206   | 305   | 302   | 306    | 206    | 284   | 262   | 368   | 344   | 375   | 400   |

|                      |       |       |       |       |       |       |       |       |       |       |       |
|----------------------|-------|-------|-------|-------|-------|-------|-------|-------|-------|-------|-------|
| La                   | 22.6  | 22.6  | 21.8  | 22.8  | 23.0  | 22.0  | 21.0  | 23.6  | 24.0  | 23.6  | 23.3  |
| Ce                   | 46.0  | 46.3  | 44.9  | 46.6  | 46.5  | 44.5  | 42.7  | 47.5  | 48.8  | 48.4  | 47.2  |
| Pr                   | 5.74  | 5.64  | 5.52  | 5.86  | 5.71  | 5.49  | 5.16  | 5.83  | 5.97  | 5.85  | 5.78  |
| Nd                   | 23.3  | 23.3  | 23.0  | 23.9  | 23.3  | 22.1  | 21.1  | 24.0  | 24.2  | 24.0  | 23.5  |
| Sm                   | 4.77  | 4.83  | 4.66  | 4.80  | 4.74  | 4.52  | 4.31  | 4.84  | 4.94  | 4.89  | 4.89  |
| Eu                   | 1.28  | 1.32  | 1.27  | 1.33  | 1.30  | 1.27  | 1.26  | 1.33  | 1.36  | 1.33  | 1.34  |
| Gd                   | 4.56  | 4.57  | 4.40  | 4.49  | 4.43  | 4.27  | 4.13  | 4.57  | 4.62  | 4.54  | 4.55  |
| Tb                   | 0.681 | 0.696 | 0.669 | 0.699 | 0.676 | 0.646 | 0.628 | 0.702 | 0.722 | 0.704 | 0.697 |
| Dy                   | 4.13  | 4.09  | 4.03  | 4.12  | 4.01  | 3.84  | 3.75  | 4.13  | 4.24  | 4.16  | 4.16  |
| Ho                   | 0.848 | 0.85  | 0.842 | 0.851 | 0.831 | 0.795 | 0.757 | 0.857 | 0.865 | 0.852 | 0.857 |
| Er                   | 2.23  | 2.30  | 2.18  | 2.27  | 2.18  | 2.13  | 2.07  | 2.31  | 2.36  | 2.32  | 2.31  |
| Tm                   | 0.321 | 0.336 | 0.32  | 0.334 | 0.321 | 0.307 | 0.296 | 0.329 | 0.345 | 0.332 | 0.325 |
| Yb                   | 2.08  | 2.11  | 2.06  | 2.12  | 2.06  | 1.94  | 1.86  | 2.06  | 2.11  | 2.09  | 2.08  |
| Lu                   | 0.309 | 0.323 | 0.311 | 0.318 | 0.306 | 0.307 | 0.295 | 0.336 | 0.34  | 0.334 | 0.331 |
| Hf                   | 3.36  | 3.36  | 3.26  | 3.48  | 3.36  | 3.30  | 3.15  | 3.48  | 3.51  | 3.51  | 3.44  |
| Ta                   | 0.457 | 0.471 | 0.457 | 0.484 | 0.465 | 0.477 | 0.447 | 0.499 | 0.504 | 0.5   | 0.49  |
| Pb                   | 9.03  | 8.91  | 7.54  | 8.03  | 8.53  | 8.57  | 8.60  | 8.43  | 9.42  | 8.72  | 8.26  |
| Th                   | 6.76  | 6.86  | 6.69  | 6.98  | 6.93  | 6.77  | 6.51  | 7.13  | 7.33  | 7.23  | 7.11  |
| U                    | 1.27  | 1.31  | 1.21  | 1.31  | 1.26  | 1.28  | 1.21  | 1.36  | 1.41  | 1.40  | 1.38  |
| ΣREE                 | 119   | 119   | 116   | 120   | 119   | 114   | 109   | 122   | 125   | 123   | 121   |
| Eu/Eu*               | 0.84  | 0.86  | 0.85  | 0.88  | 0.87  | 0.89  | 0.91  | 0.87  | 0.87  | 0.86  | 0.87  |
| (Gd/Yb) <sub>N</sub> | 1.81  | 1.79  | 1.77  | 1.75  | 1.78  | 1.82  | 1.84  | 1.83  | 1.82  | 1.80  | 1.81  |
| (La/Yb) <sub>N</sub> | 7.83  | 7.51  | 7.51  | 7.68  | 8.05  | 7.69  | 7.61  | 7.54  | 7.56  | 7.57  | 7.54  |

3.10. Table S10: Whole-rock Sr–Nd–Hf isotope data for the Nakoulai mafic dikes.

| Sample   | Rb   | Sr  | $^{87}\text{Sr}/^{86}\text{Sr}$ |               | $(^{87}\text{Sr}/^{86}\text{Sr})_i$ | Sm   | Nd   | $^{143}\text{Nd}/^{144}\text{Nd}$ |               | $(^{143}\text{Nd}/^{144}\text{Nd})_i$ | $\epsilon_{\text{Nd}}(t)$ | $T_{\text{Nd}}^{\text{DM}}$ (Ma) | $f_{\text{Sm}/\text{Nd}}$ |
|----------|------|-----|---------------------------------|---------------|-------------------------------------|------|------|-----------------------------------|---------------|---------------------------------------|---------------------------|----------------------------------|---------------------------|
|          | ppm  | ppm | ratio                           | $\pm 1\sigma$ |                                     | ppm  | ppm  | ratio                             | $\pm 1\sigma$ |                                       |                           |                                  |                           |
| 16BG11-2 | 39.2 | 387 | 0.706482                        | 0.000009      | 0.70599                             | 4.83 | 23.3 | 0.512472                          | 0.000004      | 0.512375                              | -2.15                     | 1172                             | -0.36                     |
| 16BG11-3 | 37.1 | 378 | 0.706452                        | 0.000010      | 0.70597                             | 4.66 | 23.0 | 0.512487                          | 0.000006      | 0.512391                              | -1.82                     | 1110                             | -0.38                     |
| 16BG11-4 | 38.0 | 383 | 0.706460                        | 0.000009      | 0.70597                             | 4.80 | 23.9 | 0.512489                          | 0.000005      | 0.512395                              | -1.75                     | 1092                             | -0.38                     |
| 17BG02-1 | 29.5 | 401 | 0.706510                        | 0.000012      | 0.70616                             | 4.52 | 22.1 | 0.512486                          | 0.000006      | 0.512392                              | -1.90                     | 1131                             | -0.37                     |
| 17BG02-2 | 26.4 | 394 | 0.706507                        | 0.000010      | 0.70619                             | 4.31 | 21.1 | 0.512487                          | 0.000006      | 0.512394                              | -1.86                     | 1125                             | -0.37                     |
| 17BG03-1 | 27.1 | 425 | 0.706391                        | 0.000008      | 0.70609                             | 4.84 | 24.0 | 0.512502                          | 0.000005      | 0.512410                              | -1.55                     | 1084                             | -0.38                     |
| 17BG03-2 | 30.5 | 422 | 0.706458                        | 0.000010      | 0.70612                             | 4.94 | 24.2 | 0.512492                          | 0.000006      | 0.512399                              | -1.76                     | 1112                             | -0.37                     |
| 17BG03-3 | 19.1 | 440 | 0.706274                        | 0.000009      | 0.70607                             | 4.89 | 24.0 | 0.512492                          | 0.000008      | 0.512399                              | -1.77                     | 1113                             | -0.37                     |
| 17BG03-4 | 17.0 | 432 | 0.706275                        | 0.000008      | 0.70609                             | 4.89 | 23.5 | 0.512486                          | 0.000006      | 0.512391                              | -1.92                     | 1152                             | -0.36                     |

Table S10. (continued)

| Sample   | Lu    | Hf   | $^{176}\text{Hf}/^{177}\text{Hf}$ |               | $(^{176}\text{Hf}/^{177}\text{Hf})_i$ | $\epsilon_{\text{Hf}}(t)$ | $T_{\text{Hf}}^{\text{DM}}$ (Ma) | $f_{\text{Lu}/\text{Hf}}$ |
|----------|-------|------|-----------------------------------|---------------|---------------------------------------|---------------------------|----------------------------------|---------------------------|
|          | ppm   | ppm  | ratio                             | $\pm 1\sigma$ |                                       |                           |                                  |                           |
| 16BG11-2 | 0.323 | 3.36 | 0.282825                          | 0.000006      | 0.282794                              | 3.4                       | 912                              | -0.59                     |
| 16BG11-3 | 0.311 | 3.26 | 0.282813                          | 0.000004      | 0.282782                              | 3.0                       | 935                              | -0.59                     |
| 16BG11-4 | 0.318 | 3.48 | 0.282827                          | 0.000006      | 0.282798                              | 3.5                       | 884                              | -0.61                     |
| 17BG02-1 | 0.307 | 3.30 | 0.282816                          | 0.000005      | 0.282787                              | 3.1                       | 915                              | -0.60                     |
| 17BG02-2 | 0.295 | 3.15 | 0.282803                          | 0.000007      | 0.282774                              | 2.6                       | 946                              | -0.60                     |
| 17BG03-1 | 0.336 | 3.48 | 0.282800                          | 0.000006      | 0.282770                              | 2.5                       | 968                              | -0.59                     |
| 17BG03-2 | 0.340 | 3.51 | 0.282809                          | 0.000005      | 0.282779                              | 2.8                       | 949                              | -0.59                     |
| 17BG03-3 | 0.334 | 3.51 | 0.282820                          | 0.000005      | 0.282791                              | 3.2                       | 917                              | -0.59                     |
| 17BG03-4 | 0.331 | 3.44 | 0.282827                          | 0.000006      | 0.282798                              | 3.5                       | 907                              | -0.59                     |

3.11. Table S11: Zircon Hf–O isotope data for the Nakoulai mafic dikes.

| Spot     | $^{176}\text{Yb}/^{177}\text{Hf}$ | $^{176}\text{Lu}/^{177}\text{Hf}$ | $^{176}\text{Hf}/^{177}\text{Hf}$ | $\pm 2\sigma$ | $(^{176}\text{Hf}/^{177}\text{Hf})_i$ | $\epsilon_{\text{Hf}}(0)$ | $\epsilon_{\text{Hf}}(t)$ | $\pm 2\sigma$ | $T_{\text{DM}}$ (Ma) | $f_{\text{Lu/Hf}}$ | $\delta^{18}\text{O}(\text{‰})$ | $\pm 2\sigma$ |
|----------|-----------------------------------|-----------------------------------|-----------------------------------|---------------|---------------------------------------|---------------------------|---------------------------|---------------|----------------------|--------------------|---------------------------------|---------------|
| 16BG11-3 |                                   |                                   |                                   |               |                                       |                           |                           |               |                      |                    |                                 |               |
| 1        | 0.15269                           | 0.00428                           | 0.282760                          | 0.000012      | 0.282750                              | -0.43                     | 1.89                      | 0.44          | 764                  | -0.87              | 6.85                            | 0.21          |
| 2        | 0.12379                           | 0.00377                           | 0.282798                          | 0.000012      | 0.282789                              | 0.91                      | 3.29                      | 0.42          | 695                  | -0.89              | 6.71                            | 0.21          |
| 3        | 0.10983                           | 0.00338                           | 0.282779                          | 0.000013      | 0.282771                              | 0.24                      | 2.59                      | 0.44          | 716                  | -0.90              | 5.66                            | 0.21          |
| 4        | 0.20270                           | 0.00523                           | 0.282738                          | 0.000014      | 0.282727                              | -1.19                     | 1.00                      | 0.49          | 820                  | -0.84              | 5.97                            | 0.20          |
| 5        | 0.15725                           | 0.00531                           | 0.282667                          | 0.000012      | 0.282655                              | -3.72                     | -1.53                     | 0.44          | 936                  | -0.84              | 6.69                            | 0.24          |
| 6        | 0.15725                           | 0.00422                           | 0.282643                          | 0.000015      | 0.282634                              | -4.55                     | -2.23                     | 0.54          | 942                  | -0.87              | 6.76                            | 0.26          |
| 7        | 0.12824                           | 0.00411                           | 0.282718                          | 0.000013      | 0.282709                              | -1.90                     | 0.36                      | 0.47          | 824                  | -0.88              | 5.64                            | 0.25          |
| 8        | 0.13844                           | 0.00371                           | 0.282724                          | 0.000016      | 0.282716                              | -1.69                     | 0.64                      | 0.55          | 806                  | -0.89              | 5.59                            | 0.22          |
| 9        | 0.15387                           | 0.00411                           | 0.282765                          | 0.000012      | 0.282756                              | -0.23                     | 2.05                      | 0.41          | 752                  | -0.88              | 6.96                            | 0.23          |
| 17BG02-2 |                                   |                                   |                                   |               |                                       |                           |                           |               |                      |                    |                                 |               |
| 1        | 0.01580                           | 0.00051                           | 0.282769                          | 0.000009      | 0.282768                              | 0.20                      | 2.71                      | 0.30          | 664                  | -0.98              | 6.36                            | 0.14          |
| 2        | 0.03991                           | 0.00125                           | 0.282816                          | 0.000010      | 0.282813                              | 1.90                      | 4.40                      | 0.35          | 608                  | -0.96              | 6.65                            | 0.21          |
| 3        | 0.03518                           | 0.00113                           | 0.282756                          | 0.000010      | 0.282753                              | -0.22                     | 2.20                      | 0.36          | 691                  | -0.97              | 6.56                            | 0.26          |
| 4        | 0.03518                           | 0.00111                           | 0.282817                          | 0.000010      | 0.282815                              | 1.97                      | 4.47                      | 0.36          | 603                  | -0.97              | 6.35                            | 0.32          |
| 5        |                                   |                                   |                                   |               |                                       |                           |                           |               |                      |                    | 6.12                            | 0.22          |
| 6        | 0.04981                           | 0.00198                           | 0.282830                          | 0.000012      | 0.282826                              | 2.47                      | 4.82                      | 0.42          | 597                  | -0.94              | 6.26                            | 0.21          |
| 7        | 0.03437                           | 0.00147                           | 0.282679                          | 0.000016      | 0.282676                              | -2.72                     | -0.29                     | 0.55          | 799                  | -0.96              | 6.25                            | 0.29          |
| 8        | 0.03523                           | 0.00134                           | 0.282702                          | 0.000010      | 0.282699                              | -2.12                     | 0.22                      | 0.36          | 772                  | -0.96              | 6.24                            | 0.12          |
| 9        | 0.03730                           | 0.00156                           | 0.282894                          | 0.000014      | 0.282891                              | 4.83                      | 7.24                      | 0.50          | 494                  | -0.95              | 6.44                            | 0.22          |
| 10       | 0.03322                           | 0.00137                           | 0.282733                          | 0.000013      | 0.282730                              | -0.92                     | 1.59                      | 0.47          | 724                  | -0.96              | 6.15                            | 0.10          |
| 11       | 0.03948                           | 0.00175                           | 0.282739                          | 0.000013      | 0.282734                              | -0.71                     | 1.66                      | 0.47          | 723                  | -0.95              | 6.20                            | 0.30          |
| 12       | 0.02619                           | 0.00115                           | 0.282870                          | 0.000013      | 0.282867                              | 3.91                      | 6.36                      | 0.45          | 526                  | -0.97              | 6.44                            | 0.26          |

|    |         |         |          |          |          |      |      |      |     |       |      |      |
|----|---------|---------|----------|----------|----------|------|------|------|-----|-------|------|------|
| 13 | 0.09741 | 0.00335 | 0.282872 | 0.000030 | 0.282865 | 4.59 | 6.78 | 1.06 | 529 | -0.90 | 6.04 | 0.24 |
|----|---------|---------|----------|----------|----------|------|------|------|-----|-------|------|------|

3.12. Table S12: LA-ICP-MS analyzed trace elements (ppm) for standard sample (TB-1G).

| Spot     | Li   | Sc   | V   | Cr   | Co   | Ni   | Cu   | Zn  | Ga   | Rb  | Sr   | Y    | Zr  | Nb   | Cs   | Ba   | La   |
|----------|------|------|-----|------|------|------|------|-----|------|-----|------|------|-----|------|------|------|------|
| TB-1G-01 | 18.4 | 26.0 | 190 | 58.9 | 24.2 | 16.2 | 78.6 | 100 | 22.7 | 148 | 1376 | 26.6 | 248 | 27.3 | 2.81 | 1003 | 45.5 |
| TB-1G-02 | 18.5 | 26.1 | 189 | 64.5 | 24.1 | 17.2 | 78.3 | 98  | 24.3 | 150 | 1388 | 26.0 | 247 | 27.1 | 2.83 | 1002 | 45.5 |
| TB-1G-03 | 18.3 | 25.1 | 190 | 57.5 | 23.7 | 14.9 | 76.6 | 100 | 23.5 | 149 | 1366 | 25.8 | 242 | 26.9 | 2.79 | 983  | 43.1 |
| TB-1G-04 | 17.3 | 24.9 | 191 | 58.0 | 24.0 | 17.7 | 77.6 | 103 | 23.0 | 149 | 1412 | 26.6 | 249 | 27.7 | 2.90 | 991  | 44.6 |
| TB-1G-05 | 18.0 | 25.0 | 189 | 61.9 | 24.3 | 17.7 | 79.7 | 103 | 21.9 | 151 | 1412 | 26.6 | 247 | 27.3 | 2.75 | 996  | 45.8 |
| TB-1G-06 | 17.0 | 25.2 | 191 | 60.9 | 24.2 | 16.5 | 79.5 | 103 | 23.6 | 151 | 1417 | 26.2 | 248 | 28.4 | 2.96 | 989  | 45.8 |
| TB-1G-07 | 19.3 | 24.1 | 192 | 55.1 | 24.0 | 14.2 | 77.7 | 101 | 23.2 | 152 | 1402 | 26.1 | 250 | 28.4 | 2.86 | 995  | 44.9 |
| TB-1G-08 | 17.1 | 23.6 | 192 | 58.9 | 24.3 | 19.0 | 78.2 | 103 | 22.0 | 149 | 1386 | 25.8 | 250 | 27.5 | 2.88 | 969  | 44.1 |
| TB-1G-09 | 18.4 | 24.2 | 193 | 60.9 | 24.0 | 17.0 | 81.0 | 104 | 23.0 | 152 | 1427 | 26.6 | 258 | 28.3 | 2.90 | 1000 | 45.7 |
| TB-1G-10 | 18.4 | 25.0 | 195 | 60.6 | 24.0 | 18.4 | 80.1 | 108 | 21.0 | 150 | 1424 | 27.0 | 254 | 27.4 | 2.79 | 1000 | 45.0 |
| TB-1G-11 | 19.6 | 24.4 | 195 | 58.0 | 23.6 | 17.9 | 77.5 | 104 | 22.3 | 153 | 1428 | 26.4 | 260 | 28.3 | 3.08 | 999  | 46.2 |
| TB-1G-12 | 19.0 | 25.8 | 196 | 60.0 | 24.0 | 15.8 | 76.9 | 103 | 22.7 | 152 | 1409 | 26.7 | 254 | 27.6 | 2.92 | 992  | 44.9 |
| TB-1G-13 | 19.9 | 24.4 | 195 | 57.8 | 23.2 | 18.3 | 77.5 | 102 | 22.5 | 151 | 1410 | 25.9 | 255 | 28.2 | 3.05 | 992  | 45.2 |
| TB-1G-14 | 17.7 | 24.0 | 190 | 61.4 | 23.6 | 19.2 | 78.6 | 104 | 22.4 | 151 | 1395 | 26.5 | 254 | 27.0 | 2.65 | 989  | 44.8 |
| TB-1G-15 | 18.0 | 24.0 | 190 | 59.5 | 23.8 | 17.5 | 77.9 | 104 | 22.0 | 150 | 1408 | 26.2 | 255 | 28.1 | 2.81 | 1001 | 44.8 |
| TB-1G-16 | 18.0 | 24.5 | 191 | 53.7 | 23.8 | 15.9 | 77.9 | 103 | 22.2 | 152 | 1405 | 27.0 | 258 | 27.3 | 2.95 | 988  | 45.5 |
| TB-1G-17 | 18.2 | 24.5 | 193 | 55.0 | 23.8 | 16.5 | 78.0 | 105 | 22.0 | 150 | 1410 | 26.1 | 257 | 28.4 | 3.07 | 993  | 46.3 |
| TB-1G-18 | 17.0 | 24.8 | 190 | 59.2 | 23.6 | 16.1 | 79.6 | 102 | 21.9 | 149 | 1409 | 26.4 | 247 | 27.5 | 2.78 | 987  | 45.4 |
| TB-1G-19 | 16.1 | 24.6 | 190 | 58.3 | 24.1 | 16.4 | 80.0 | 101 | 21.9 | 151 | 1409 | 26.5 | 252 | 27.2 | 2.92 | 993  | 45.0 |
| TB-1G-20 | 17.7 | 23.9 | 194 | 58.3 | 24.2 | 14.9 | 78.9 | 103 | 22.8 | 149 | 1413 | 25.4 | 251 | 27.7 | 2.90 | 981  | 45.3 |

|                     |      |      |     |      |      |      |      |     |      |     |      |      |     |      |      |      |      |
|---------------------|------|------|-----|------|------|------|------|-----|------|-----|------|------|-----|------|------|------|------|
| TB-1G-21            | 16.9 | 23.7 | 193 | 56.5 | 24.0 | 16.2 | 78.6 | 101 | 21.9 | 149 | 1397 | 26.3 | 247 | 28.0 | 2.87 | 999  | 45.7 |
| TB-1G-22            | 18.0 | 23.7 | 192 | 57.5 | 24.4 | 15.3 | 78.4 | 107 | 21.0 | 153 | 1409 | 27.1 | 251 | 28.0 | 2.95 | 977  | 45.0 |
| TB-1G-23            | 18.4 | 24.2 | 195 | 59.8 | 23.5 | 14.5 | 78.8 | 102 | 21.1 | 152 | 1408 | 26.5 | 251 | 27.9 | 2.90 | 1007 | 45.7 |
| TB-1G-24            | 17.7 | 24.5 | 190 | 56.9 | 24.2 | 13.6 | 76.9 | 106 | 22.2 | 151 | 1410 | 26.1 | 256 | 27.6 | 2.97 | 1005 | 45.7 |
| TB-1G-25            | 17.5 | 24.8 | 191 | 55.1 | 24.0 | 16.5 | 78.0 | 103 | 21.4 | 152 | 1410 | 26.4 | 250 | 27.5 | 2.92 | 1015 | 45.2 |
| TB-1G-26            | 18.0 | 25.8 | 191 | 64.1 | 24.2 | 17.3 | 77.4 | 106 | 24.2 | 149 | 1401 | 26.5 | 252 | 27.4 | 2.82 | 1023 | 46.0 |
| Reference<br>value* | -    | 22.8 | 189 | 60.0 | 23.5 | 19.4 | 73.1 | 102 | 19.8 | 145 | 1363 | 26.9 | 250 | 28.2 | -    | 925  | 45.3 |

Table S12. (continued)

| Spot     | Ce   | Pr   | Nd   | Sm   | Eu   | Gd   | Tb    | Dy   | Ho    | Er   | Tm    | Yb   | Lu    | Hf   | Ta   | Pb   | Th   | U    |
|----------|------|------|------|------|------|------|-------|------|-------|------|-------|------|-------|------|------|------|------|------|
| TB-1G-01 | 91.1 | 10.2 | 41.1 | 7.47 | 1.73 | 5.85 | 0.782 | 4.19 | 0.879 | 3.10 | 0.346 | 2.63 | 0.348 | 5.59 | 1.25 | 17.5 | 15.5 | 4.35 |
| TB-1G-02 | 91.8 | 10.2 | 40.0 | 7.71 | 1.95 | 6.33 | 0.710 | 4.55 | 0.943 | 2.48 | 0.350 | 2.82 | 0.420 | 5.31 | 1.23 | 17.2 | 15.2 | 4.31 |
| TB-1G-03 | 89.9 | 9.7  | 40.4 | 6.51 | 1.79 | 5.22 | 0.739 | 4.47 | 0.868 | 2.57 | 0.324 | 2.32 | 0.350 | 5.78 | 1.39 | 16.5 | 15.2 | 4.11 |
| TB-1G-04 | 92.0 | 10.1 | 43.5 | 7.61 | 1.91 | 5.95 | 0.749 | 4.57 | 0.949 | 2.77 | 0.375 | 2.29 | 0.376 | 5.38 | 1.29 | 16.6 | 15.4 | 4.41 |
| TB-1G-05 | 92.5 | 10.3 | 40.3 | 7.00 | 1.98 | 6.27 | 0.750 | 4.24 | 0.915 | 2.87 | 0.384 | 2.27 | 0.411 | 5.19 | 1.42 | 17.1 | 15.7 | 4.28 |
| TB-1G-06 | 92.7 | 10.2 | 39.6 | 7.61 | 2.01 | 6.02 | 0.727 | 4.85 | 0.909 | 2.67 | 0.424 | 2.86 | 0.331 | 5.54 | 1.40 | 17.3 | 15.5 | 4.34 |
| TB-1G-07 | 90.5 | 10.3 | 42.9 | 6.63 | 1.88 | 6.03 | 0.777 | 4.46 | 0.974 | 2.39 | 0.401 | 2.79 | 0.385 | 5.34 | 1.42 | 17.4 | 15.2 | 4.43 |
| TB-1G-08 | 90.7 | 10.0 | 37.2 | 7.33 | 1.90 | 5.77 | 0.835 | 4.61 | 0.932 | 2.94 | 0.341 | 2.59 | 0.377 | 5.33 | 1.36 | 17.1 | 15.1 | 4.22 |
| TB-1G-09 | 92.4 | 10.4 | 40.1 | 7.23 | 1.86 | 6.31 | 0.771 | 5.21 | 0.864 | 2.68 | 0.309 | 2.63 | 0.382 | 5.69 | 1.43 | 17.8 | 15.2 | 4.24 |
| TB-1G-10 | 93.3 | 10.3 | 39.7 | 7.69 | 1.87 | 6.02 | 0.807 | 4.48 | 0.892 | 2.78 | 0.375 | 2.28 | 0.360 | 5.83 | 1.34 | 17.7 | 15.1 | 4.28 |
| TB-1G-11 | 94.9 | 10.5 | 41.0 | 8.02 | 1.92 | 5.83 | 0.836 | 4.79 | 0.985 | 2.51 | 0.318 | 2.53 | 0.409 | 5.85 | 1.34 | 17.8 | 15.9 | 4.21 |
| TB-1G-12 | 94.2 | 10.5 | 40.1 | 6.92 | 1.86 | 6.01 | 0.727 | 4.68 | 0.959 | 2.56 | 0.422 | 2.62 | 0.359 | 5.68 | 1.34 | 16.9 | 15.8 | 4.23 |
| TB-1G-13 | 92.6 | 10.3 | 39.3 | 7.71 | 1.86 | 5.90 | 0.790 | 4.73 | 0.957 | 2.45 | 0.319 | 2.53 | 0.381 | 5.70 | 1.34 | 17.5 | 15.1 | 4.17 |
| TB-1G-14 | 91.5 | 10.2 | 39.1 | 7.56 | 1.91 | 5.88 | 0.734 | 4.26 | 0.863 | 2.53 | 0.401 | 2.80 | 0.401 | 5.40 | 1.45 | 16.5 | 14.6 | 4.24 |

|                     |      |      |      |      |      |      |       |      |       |      |       |      |       |      |      |      |      |      |
|---------------------|------|------|------|------|------|------|-------|------|-------|------|-------|------|-------|------|------|------|------|------|
| TB-1G-15            | 92.0 | 10.4 | 41.4 | 7.75 | 1.73 | 5.27 | 0.804 | 4.67 | 0.926 | 2.85 | 0.374 | 2.84 | 0.403 | 5.40 | 1.27 | 17.0 | 14.8 | 4.37 |
| TB-1G-16            | 93.0 | 10.0 | 39.9 | 6.91 | 1.78 | 5.67 | 0.816 | 4.64 | 0.840 | 2.82 | 0.376 | 3.04 | 0.407 | 5.62 | 1.44 | 17.0 | 15.0 | 4.42 |
| TB-1G-17            | 91.3 | 10.2 | 41.1 | 7.44 | 1.68 | 5.63 | 0.766 | 4.66 | 0.899 | 2.63 | 0.387 | 2.29 | 0.371 | 5.68 | 1.31 | 17.3 | 15.0 | 4.63 |
| TB-1G-18            | 92.7 | 10.2 | 40.3 | 7.58 | 1.77 | 6.06 | 0.774 | 4.50 | 0.876 | 2.70 | 0.340 | 2.69 | 0.364 | 5.34 | 1.30 | 17.5 | 14.8 | 4.28 |
| TB-1G-19            | 92.7 | 10.3 | 40.7 | 7.58 | 1.73 | 6.06 | 0.789 | 4.71 | 0.943 | 2.90 | 0.366 | 3.09 | 0.394 | 5.62 | 1.26 | 17.1 | 15.0 | 4.27 |
| TB-1G-20            | 91.8 | 10.4 | 39.8 | 6.70 | 1.85 | 5.81 | 0.779 | 4.84 | 0.956 | 3.04 | 0.357 | 2.29 | 0.406 | 5.48 | 1.33 | 17.4 | 15.7 | 4.38 |
| TB-1G-21            | 92.1 | 10.5 | 39.9 | 7.17 | 1.69 | 6.48 | 0.735 | 4.70 | 0.907 | 2.39 | 0.343 | 2.37 | 0.320 | 5.47 | 1.29 | 17.3 | 15.1 | 4.40 |
| TB-1G-22            | 92.0 | 10.4 | 40.6 | 7.17 | 1.82 | 6.02 | 0.746 | 4.73 | 0.949 | 2.83 | 0.458 | 2.82 | 0.383 | 5.84 | 1.38 | 17.6 | 15.2 | 4.20 |
| TB-1G-23            | 92.8 | 10.2 | 40.6 | 7.01 | 1.71 | 6.27 | 0.739 | 4.17 | 0.855 | 2.62 | 0.336 | 2.55 | 0.346 | 5.69 | 1.42 | 17.6 | 15.9 | 4.25 |
| TB-1G-24            | 92.2 | 10.3 | 39.4 | 7.14 | 1.85 | 5.51 | 0.773 | 4.45 | 0.874 | 2.69 | 0.383 | 2.74 | 0.379 | 5.81 | 1.38 | 17.5 | 14.9 | 4.29 |
| TB-1G-25            | 92.6 | 10.0 | 38.6 | 7.74 | 1.83 | 5.33 | 0.708 | 4.58 | 0.885 | 2.90 | 0.412 | 2.82 | 0.396 | 5.62 | 1.42 | 17.4 | 15.3 | 4.30 |
| TB-1G-26            | 94.6 | 10.4 | 41.0 | 7.99 | 1.98 | 6.30 | 0.743 | 4.60 | 0.979 | 2.46 | 0.354 | 2.76 | 0.406 | 5.50 | 1.28 | 17.6 | 15.6 | 4.43 |
| Reference<br>value* | 89.7 | 10.6 | 40.0 | 7.63 | 1.91 | 6.20 | 0.840 | 4.95 | 0.980 | 2.76 | 0.390 | 2.58 | 0.400 | 5.87 | 1.51 | 16.0 | 15.0 | 4.20 |

\*Kimura, J.I., and Chang, Q., 2012. Origin of the suppressed matrix effect for improved analytical performance in determination of major and trace elements in anhydrous silicate samples using 200 nm femtosecond laser ablation sector-field inductively coupled plasma mass spectrometry: *Journal of Analytical Atomic Spectrometry*, v. 27, p. 1549–1559.



3.13. Table S13: Trace element (ppm) compositions of replicate sample and reference materials.

|    | 17BG03-3           | 17BG03-3R | AGV-2               | BHVO-2 | GSR-1 | GSR-2 | GSR-3 | W-2a  |
|----|--------------------|-----------|---------------------|--------|-------|-------|-------|-------|
|    | Replicate analysis |           | Reference materials |        |       |       |       |       |
| Sc | 27.0               | 26.9      | 12.6                | 31.1   | 6.2   | 9.4   | 14.4  | 35.5  |
| Ti | 6155               | 6115      | 6039                | 16569  | 1630  | 3000  | 13893 | 6606  |
| V  | 247                | 247       | 117                 | 319    | 23    | 95    | 168   | 270   |
| Cr | 91.5               | 92.6      | 16.6                | 282    | 4.64  | 30.3  | 134   | 86.4  |
| Mn | 1069               | 1061      | 720                 | 1289   | 458   | 582   | 1292  | 1303  |
| Co | 27.2               | 27.3      | 15.1                | 44.2   | 3.30  | 12.4  | 46.7  | 44.4  |
| Ni | 18.8               | 18.7      | 17.9                | 118    | 2.22  | 17.13 | 142   | 71.32 |
| Cu | 41.9               | 41.6      | 48.7                | 128    | 3.11  | 54.5  | 50.1  | 104   |
| Zn | 87.1               | 88.3      | 82.8                | 107    | 29.0  | 68.0  | 144   | 78.2  |
| Ga | 19.3               | 19.1      | 20.0                | 21.6   | 19.3  | 18.3  | 23.9  | 19.2  |
| Ge | 2.73               | 2.67      | 2.16                | 3.29   | 2.39  | 1.57  | 3.53  | 2.83  |
| Rb | 19.1               | 19.2      | 63.7                | 9.71   | 466   | 36.7  | 36.1  | 19.4  |
| Sr | 440                | 439       | 632                 | 380    | 104   | 799   | 1111  | 190   |
| Y  | 24.1               | 24.1      | 19.1                | 25.9   | 63.9  | 8.87  | 22.6  | 21.8  |
| Zr | 129                | 130       | 225                 | 173    | 162   | 92.6  | 282   | 94.1  |
| Nb | 8.34               | 8.38      | 14.4                | 19.3   | 38.6  | 6.92  | 69.6  | 7.92  |
| Cs | 4.47               | 4.46      | 1.10                | 0.098  | 38.5  | 2.18  | 0.418 | 0.958 |
| Ba | 375                | 373       | 1126                | 128    | 331   | 1036  | 527   | 170   |
| La | 23.6               | 23.9      | 37.7                | 15.1   | 55.8  | 21.0  | 55.1  | 10.2  |
| Ce | 48.4               | 49.1      | 67.1                | 37.2   | 105   | 40.0  | 106   | 23.5  |
| Pr | 5.85               | 5.92      | 8.06                | 5.30   | 13.4  | 4.69  | 12.6  | 3.13  |
| Nd | 24.0               | 24.2      | 31.0                | 25.0   | 48.2  | 18.5  | 51.8  | 13.9  |
| Sm | 4.89               | 4.90      | 5.42                | 6.01   | 10.1  | 3.30  | 9.96  | 3.40  |

|    |       |       |       |       |       |       |       |       |
|----|-------|-------|-------|-------|-------|-------|-------|-------|
| Eu | 1.33  | 1.362 | 1.50  | 2.03  | 0.841 | 0.997 | 3.19  | 1.02  |
| Gd | 4.538 | 4.611 | 4.669 | 5.959 | 9.358 | 2.643 | 8.509 | 3.781 |
| Tb | 0.704 | 0.714 | 0.616 | 0.923 | 1.66  | 0.371 | 1.18  | 0.637 |
| Dy | 4.16  | 4.14  | 3.537 | 5.191 | 10.5  | 1.778 | 5.349 | 3.914 |
| Ho | 0.852 | 0.870 | 0.698 | 0.971 | 2.23  | 0.332 | 0.879 | 0.851 |
| Er | 2.32  | 2.37  | 1.74  | 2.38  | 6.56  | 0.823 | 1.91  | 2.36  |
| Tm | 0.332 | 0.331 | 0.240 | 0.308 | 1.09  | 0.128 | 0.268 | 0.309 |
| Yb | 2.09  | 2.10  | 1.56  | 1.87  | 7.58  | 0.908 | 1.49  | 2.00  |
| Lu | 0.334 | 0.338 | 0.238 | 0.270 | 1.18  | 0.116 | 0.185 | 0.319 |
| Hf | 3.51  | 3.53  | 5.19  | 4.11  | 6.49  | 2.77  | 6.34  | 2.46  |
| Ta | 0.500 | 0.509 | 0.839 | 1.38  | 7.25  | 0.435 | 4.30  | 0.491 |
| Pb | 8.72  | 8.79  | 12.5  | 1.48  | 32.1  | 9.84  | 4.30  | 7.50  |
| Th | 7.23  | 7.24  | 6.049 | 1.21  | 55.1  | 2.57  | 5.82  | 2.22  |
| U  | 1.40  | 1.38  | 1.86  | 0.422 | 19.0  | 0.865 | 1.41  | 0.535 |

---
